# Supplementary material for: Synthesis of 4-sulfonyl-1,7-diesters via K2CO3-mediated alkylative debenzoylation of α-sulfonyl o-hydroxyacetophenones with acrylates
Source: Royal Society of Chemistry journal article supplement (doi:10.1039/d3ob01703f), 2024-01-01
Supplement: d3ob01703f1.pdf [file d3ob01703f1.pdf]

# Supporting Information

## Synthesis of 4-Sulfonyl-1,7-diesters via K<sub>2</sub>CO<sub>3</sub>-Mediated Alkylative Debenzoylation of $\alpha$ -Sulfonyl *o*-Hydroxyacetophenones with Acrylates

Meng-Yang Chang<sup>\*a,b,c</sup> and Pin-Hsien Chen<sup>a</sup>

<sup>a</sup>Department of Medicinal and Applied Chemistry, Kaohsiung Medical University, Kaohsiung 807, Taiwan. <sup>b</sup>Department of Medical Research, Kaohsiung Medical University Hospital, Kaohsiung 807, Taiwan. <sup>c</sup>NPUST College of Professional Studies, National Pingtung University of Science and Technology, Pingtung 912, Taiwan.

\*Corresponding author, email: [mychang@kmu.edu.tw](mailto:mychang@kmu.edu.tw)

### Table of Contents

|    |                                                                                                    |         |
|----|----------------------------------------------------------------------------------------------------|---------|
| 1. | <sup>1</sup> H NMR and <sup>13</sup> C NMR spectra copies of compounds <b>6a-6n</b> , <b>7a-7b</b> | S2~S33  |
| 2. | <sup>1</sup> H NMR and <sup>13</sup> C NMR spectra copies of compounds <b>5a-5r</b> , <b>5t-5y</b> | S34~S81 |
| 3. | <sup>1</sup> H NMR and <sup>13</sup> C NMR spectra copies of compounds <b>8a-8b</b> , <b>9</b>     | S82~S87 |
| 4. | X-ray crystal data of compound <b>7b</b>                                                           | S88~S89 |

# Compound 6a (<sup>1</sup>H-NMR spectral data)

PS1107

Pulse Sequence: s2pu1

UNITYplus-400 "unity400"

Date: Nov 6 2020

Solvent: CDCl<sub>3</sub>

Ambient temperature

Total 32 repetitions

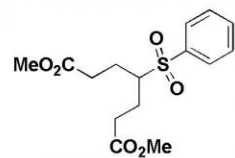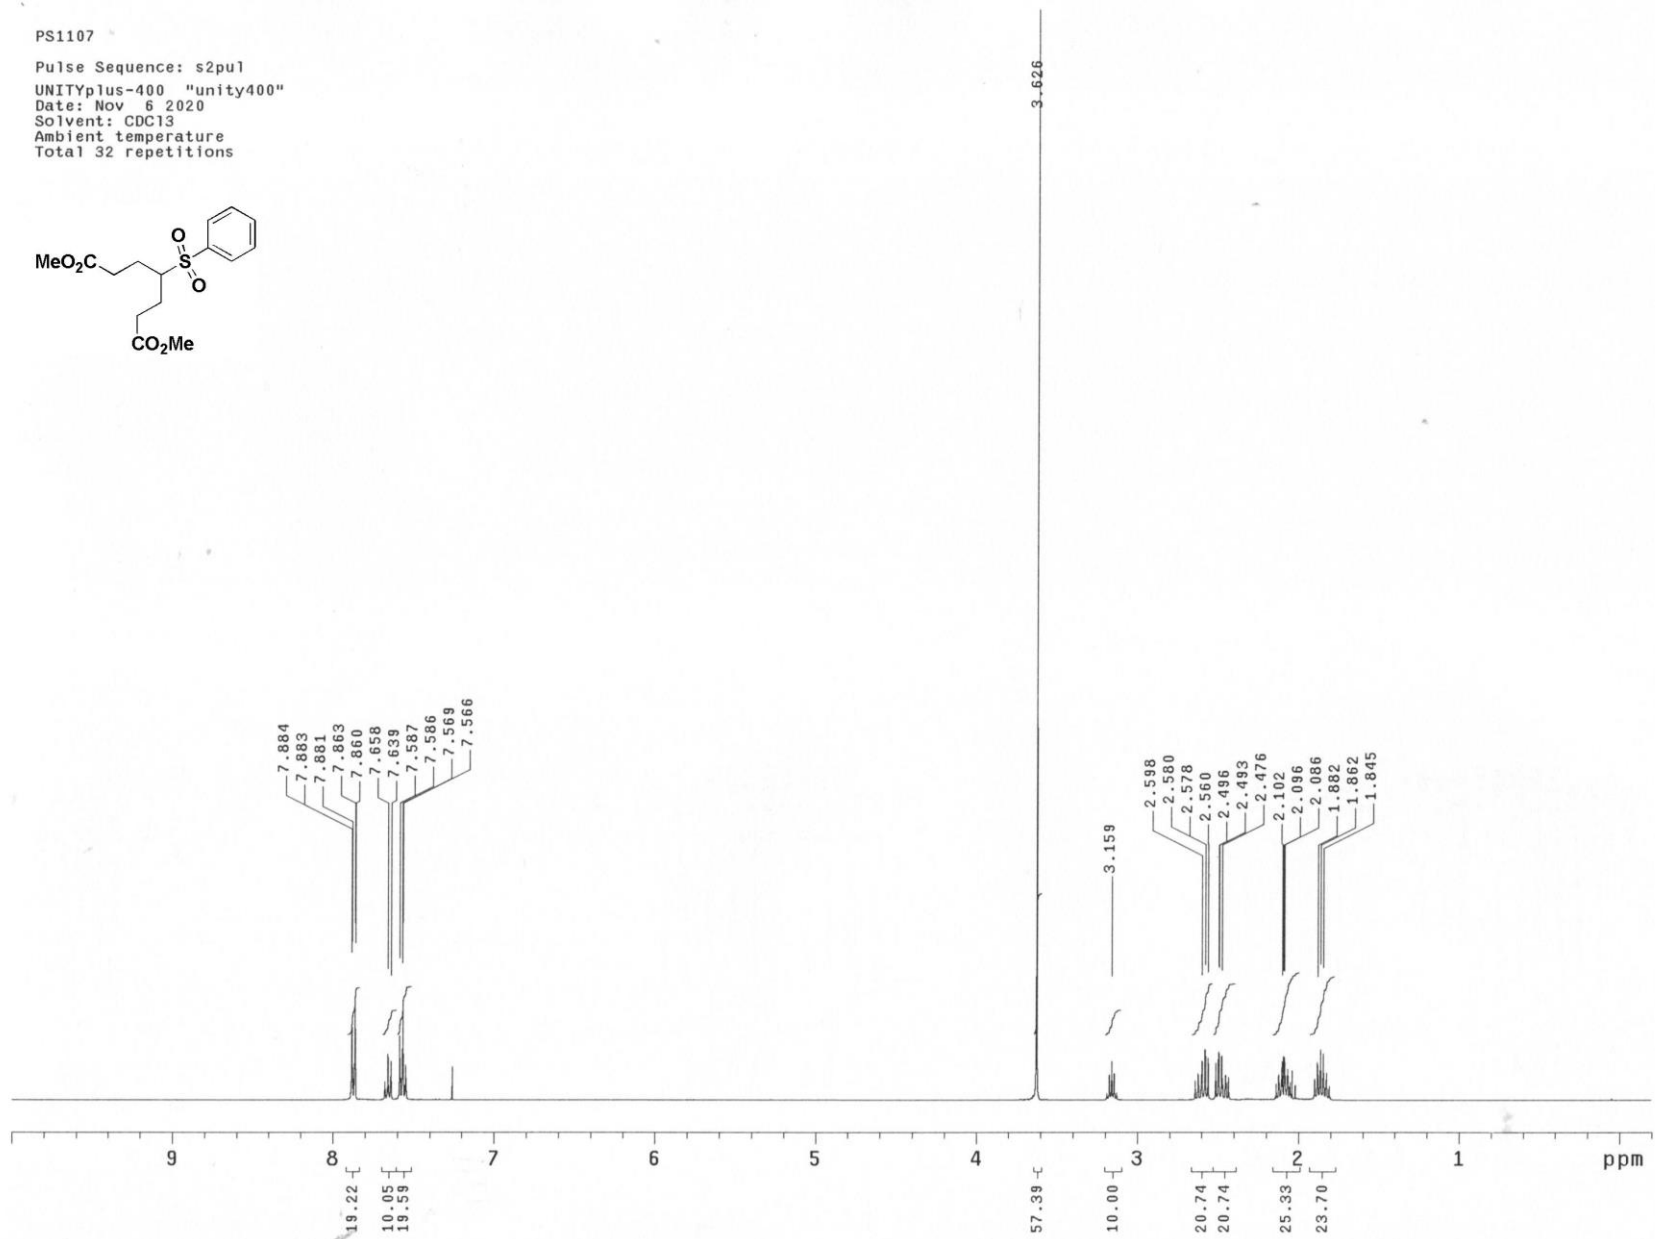

# Compound 6a (<sup>13</sup>C-NMR spectral data)

PS1107

Pulse Sequence: s2pu1  
UNITYplus-400 "unity400"  
Date: Nov 6 2020  
Solvent: CDCl<sub>3</sub>  
Ambient temperature  
Total 672 repetitions

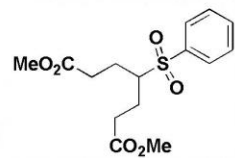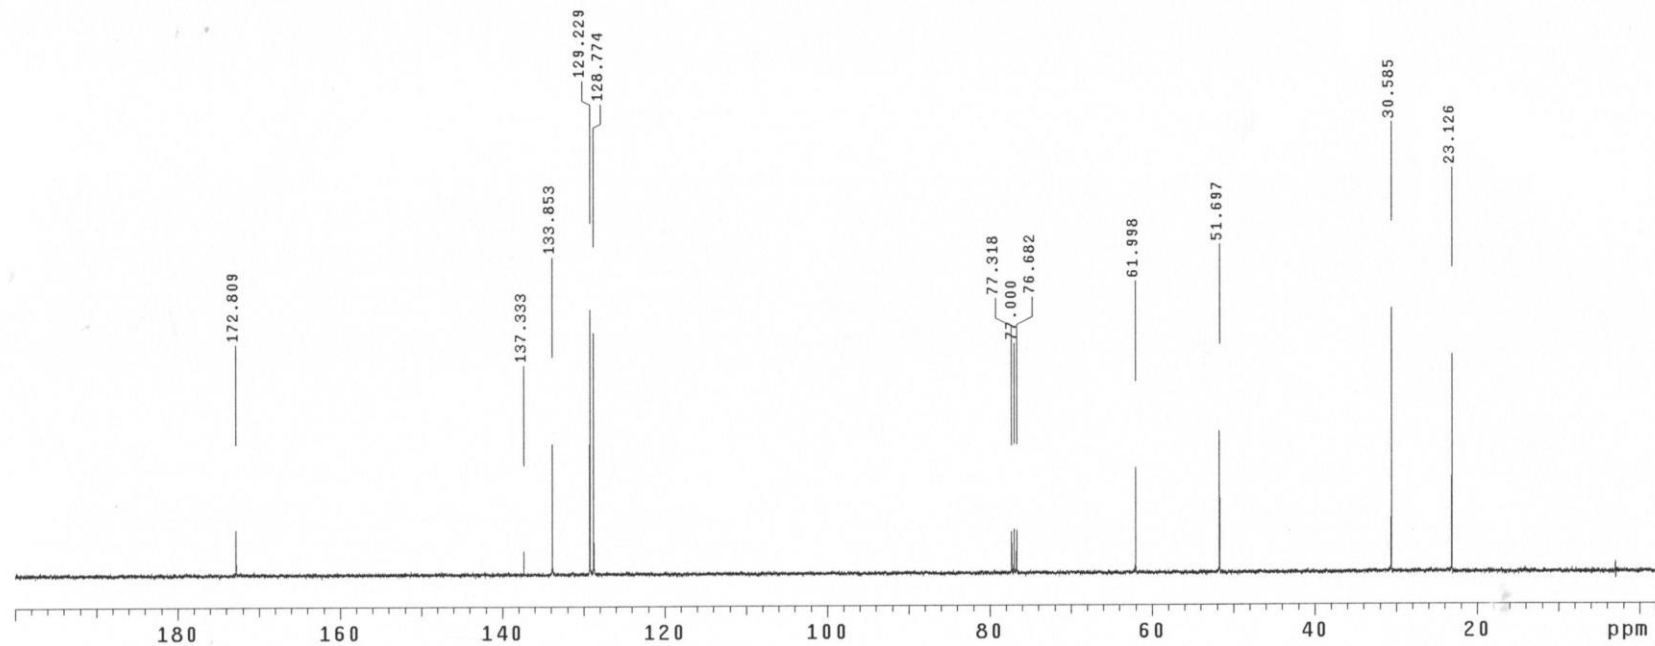

# Compound 6b (<sup>1</sup>H-NMR spectral data)

PS1105

Pulse Sequence: s2pu1

UNITYplus-400 "unity400"

Date: Nov 5 2020

Solvent: CDCl<sub>3</sub>

Ambient temperature

Total 32 repetitions

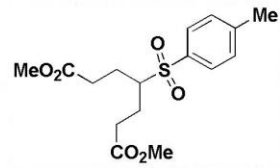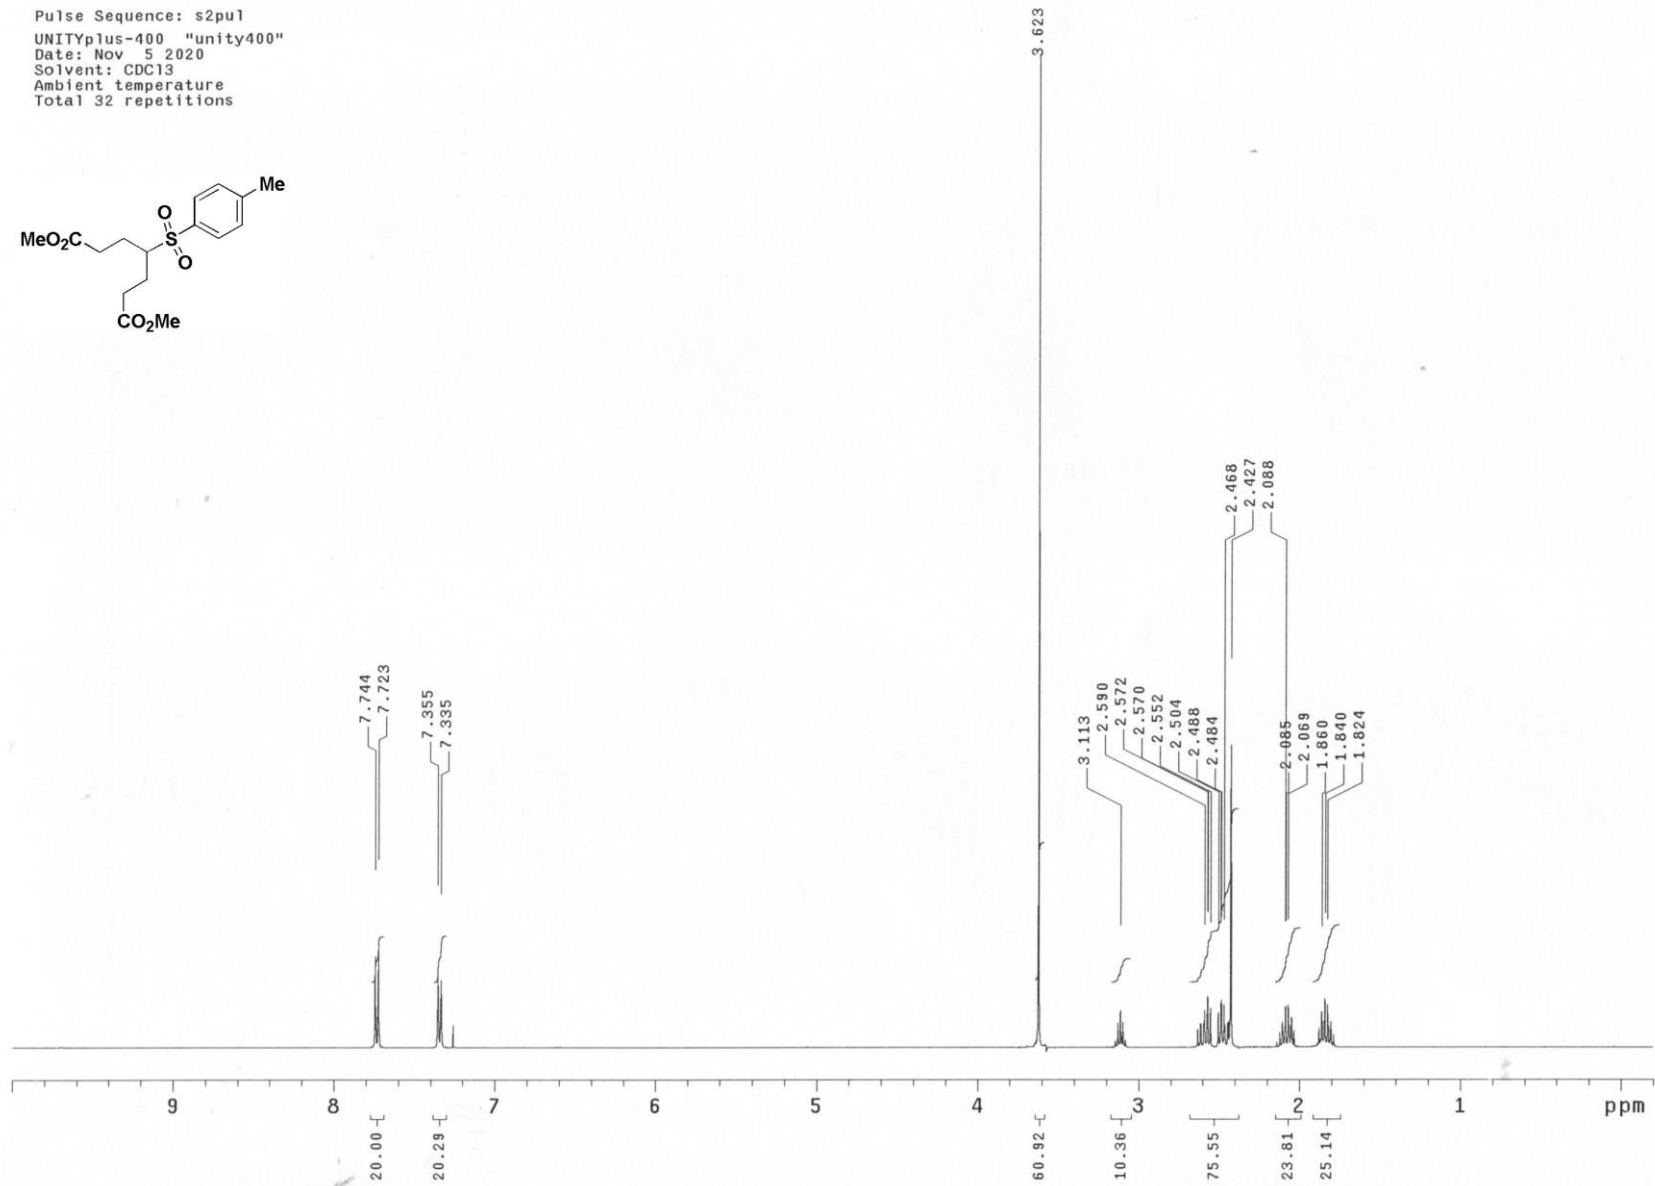



# Compound 6b (<sup>13</sup>C-NMR spectral data)

PS1105

Pulse Sequence: s2pu1

UNITYplus-400 "unity400"

Date: Nov 5 2020

Solvent: CDCl<sub>3</sub>

Ambient temperature

Total 432 repetitions

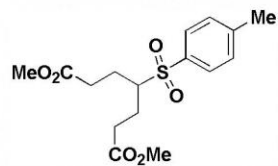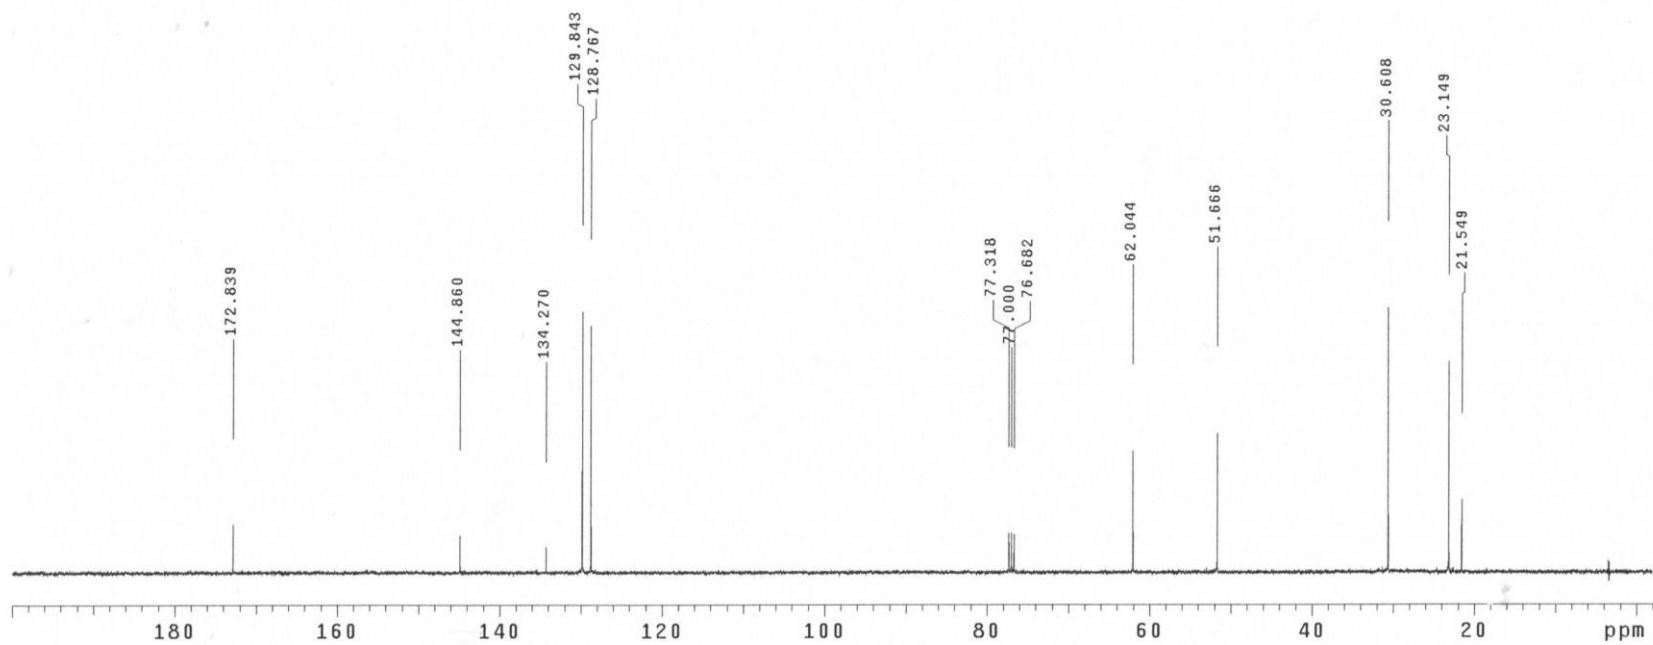

# Compound 6c (<sup>1</sup>H-NMR spectral data)

PS1113

Pulse Sequence: s2pu1  
UNITYplus-400 "unity400"  
Date: Nov 13 2020  
Solvent: CDCl<sub>3</sub>  
Ambient temperature  
Total 32 repetitions

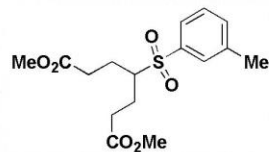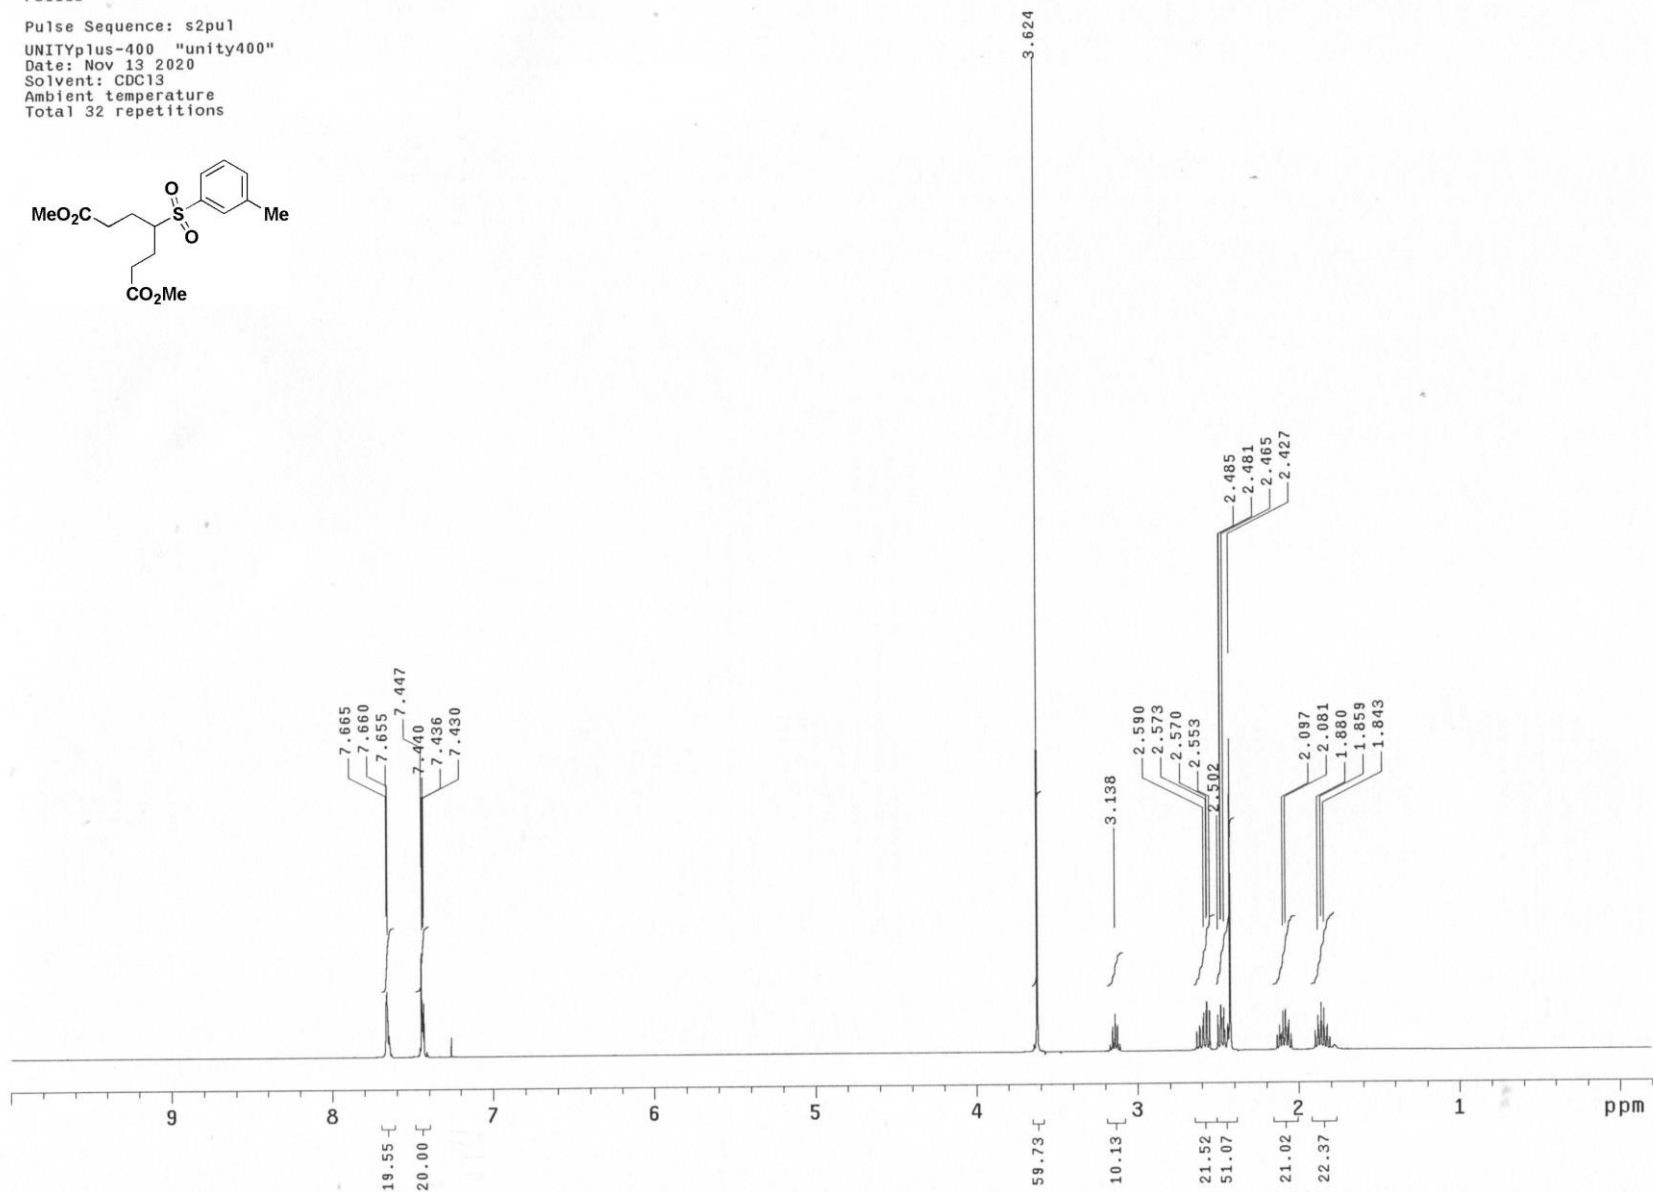

# Compound 6c (<sup>13</sup>C-NMR spectral data)

Pulse Sequence: s2pu1  
UNITYplus-400 "unity400"  
Date: Nov 13 2020  
Solvent: CDCl<sub>3</sub>  
Ambient temperature  
Total 368 repetitions

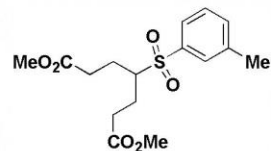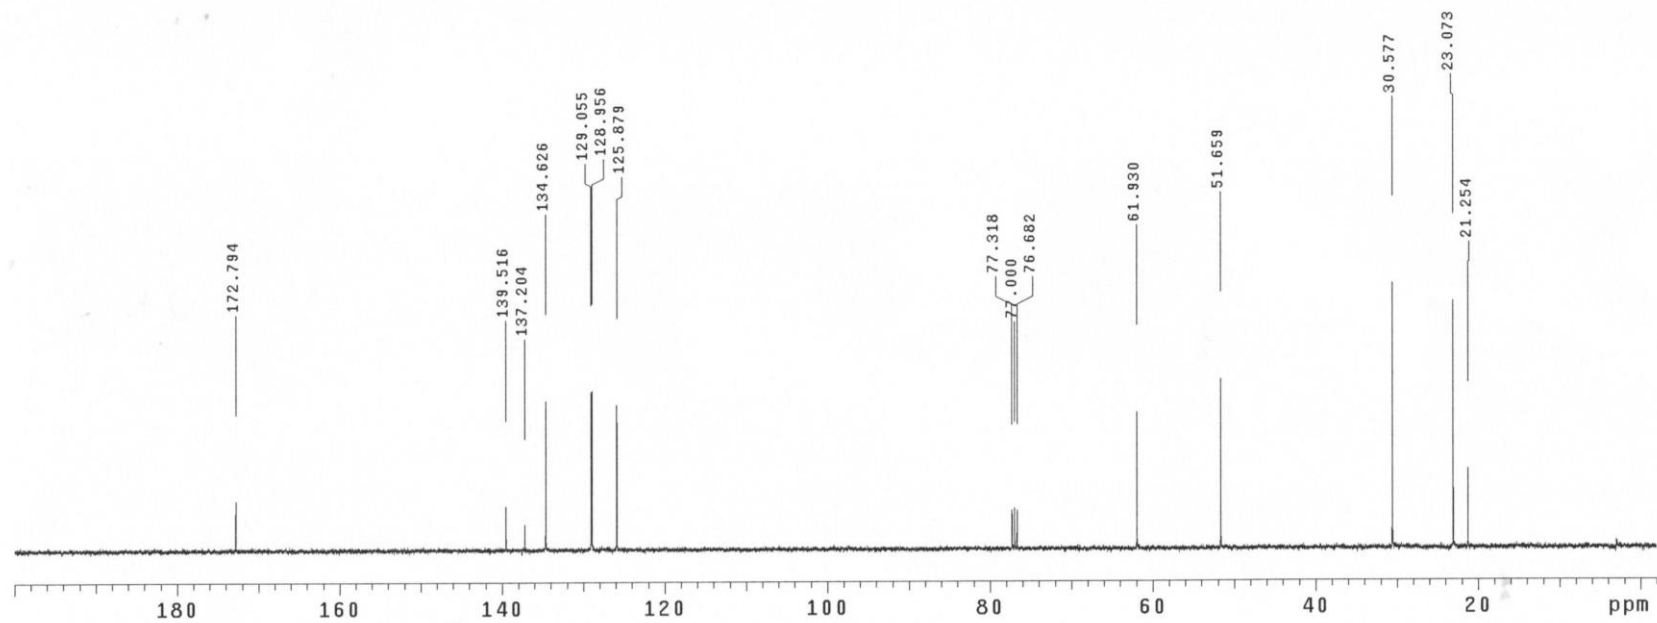

# Compound 6d (<sup>1</sup>H-NMR spectral data)

PS1120

Pulse Sequence: s2pu1

UNITYplus-400 "unity400"

Date: Nov 19 2020

Solvent: CDCl<sub>3</sub>

Ambient temperature

Total 32 repetitions

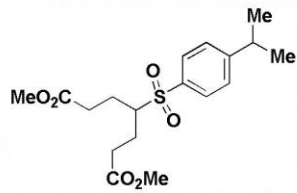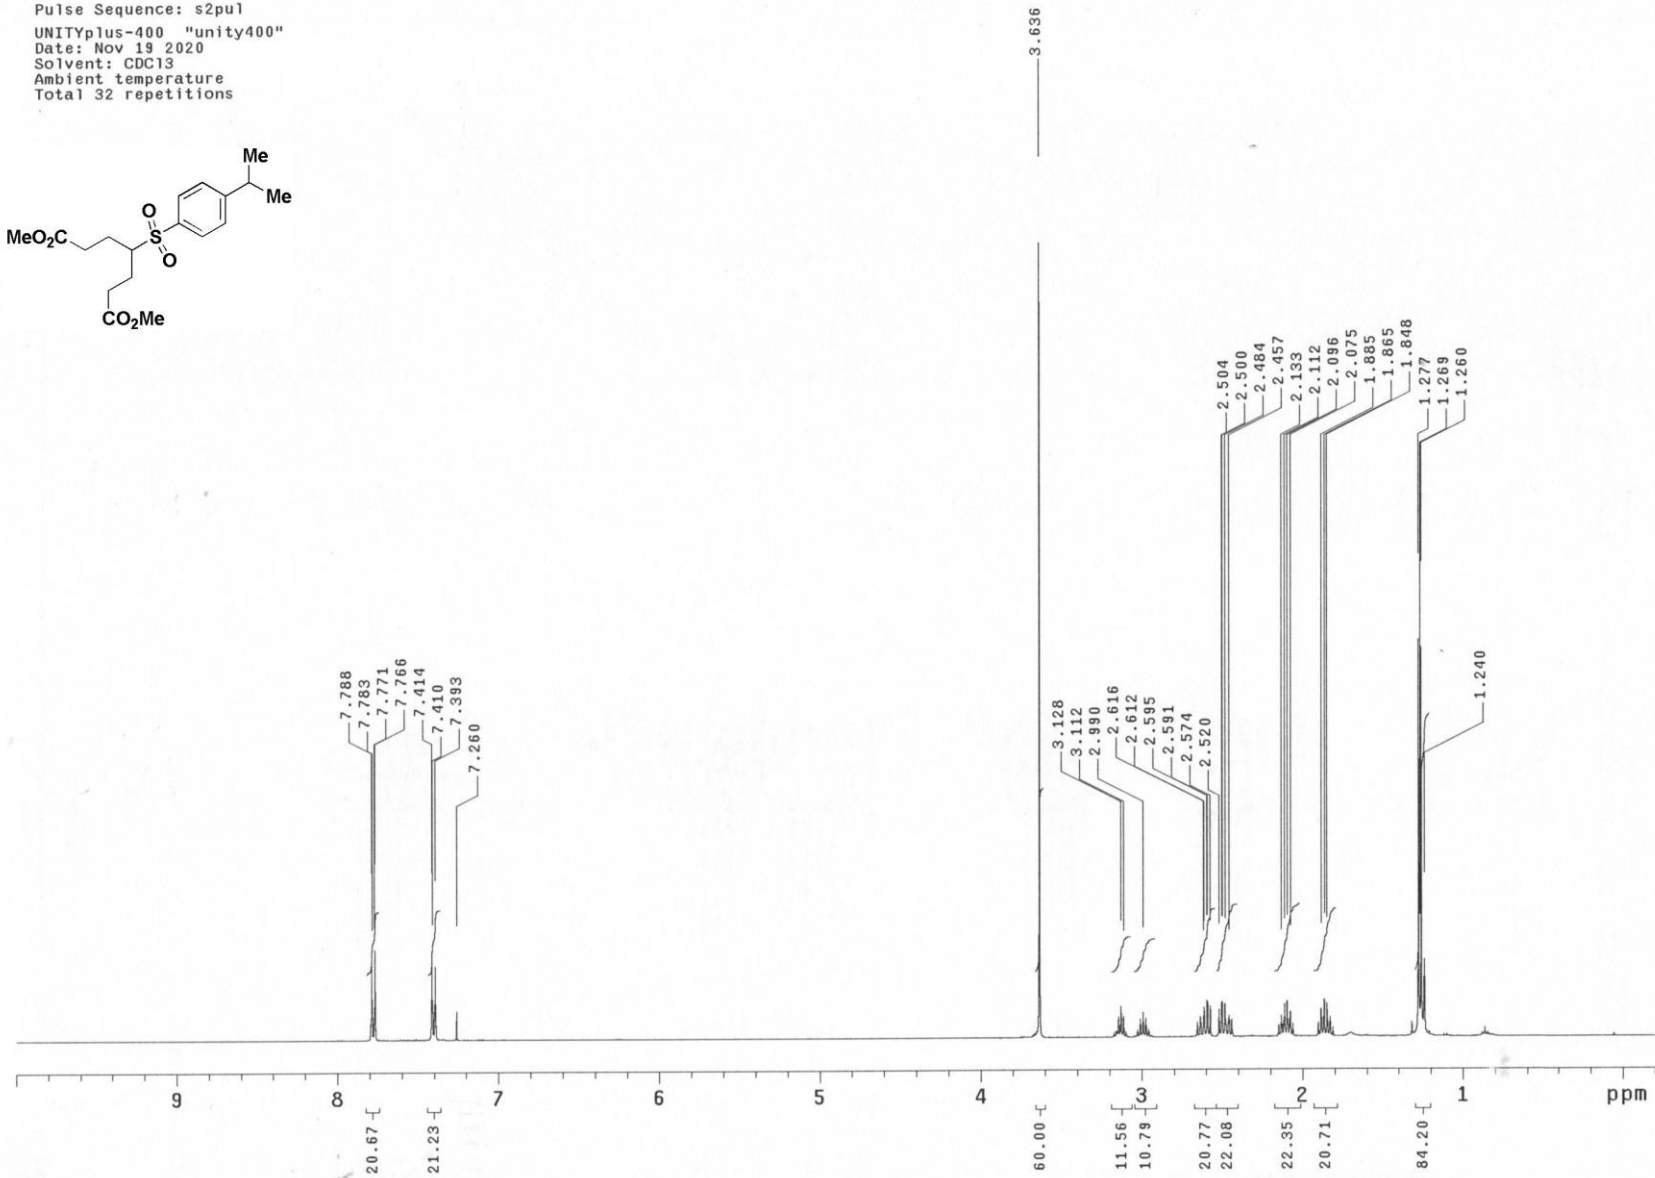

# Compound 6d (<sup>13</sup>C-NMR spectral data)

PS1120  
Pulse Sequence: s2pu1  
UNITYplus-400 "unity400"  
Date: Nov 19 2020  
Solvent: CDCl<sub>3</sub>  
Ambient temperature  
Total 1008 repetitions

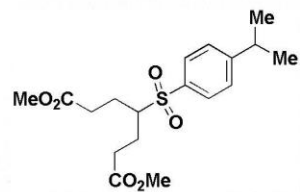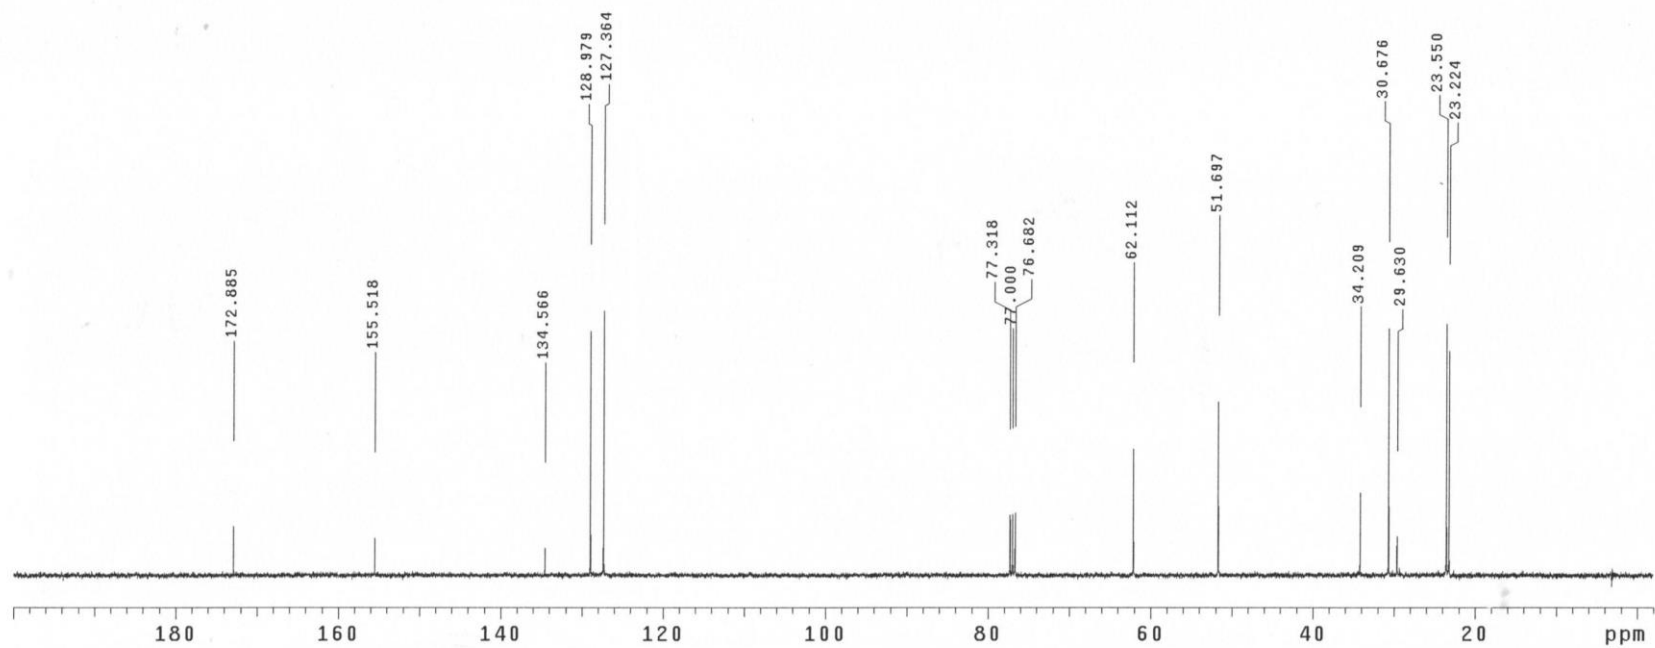

# Compound 6e (<sup>1</sup>H-NMR spectral data)

PS1125

Pulse Sequence: s2pu1

UNITYplus-400 "unity400"

Date: Nov 26 2020

Solvent: CDCl<sub>3</sub>

Ambient temperature

Total 32 repetitions

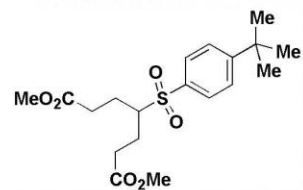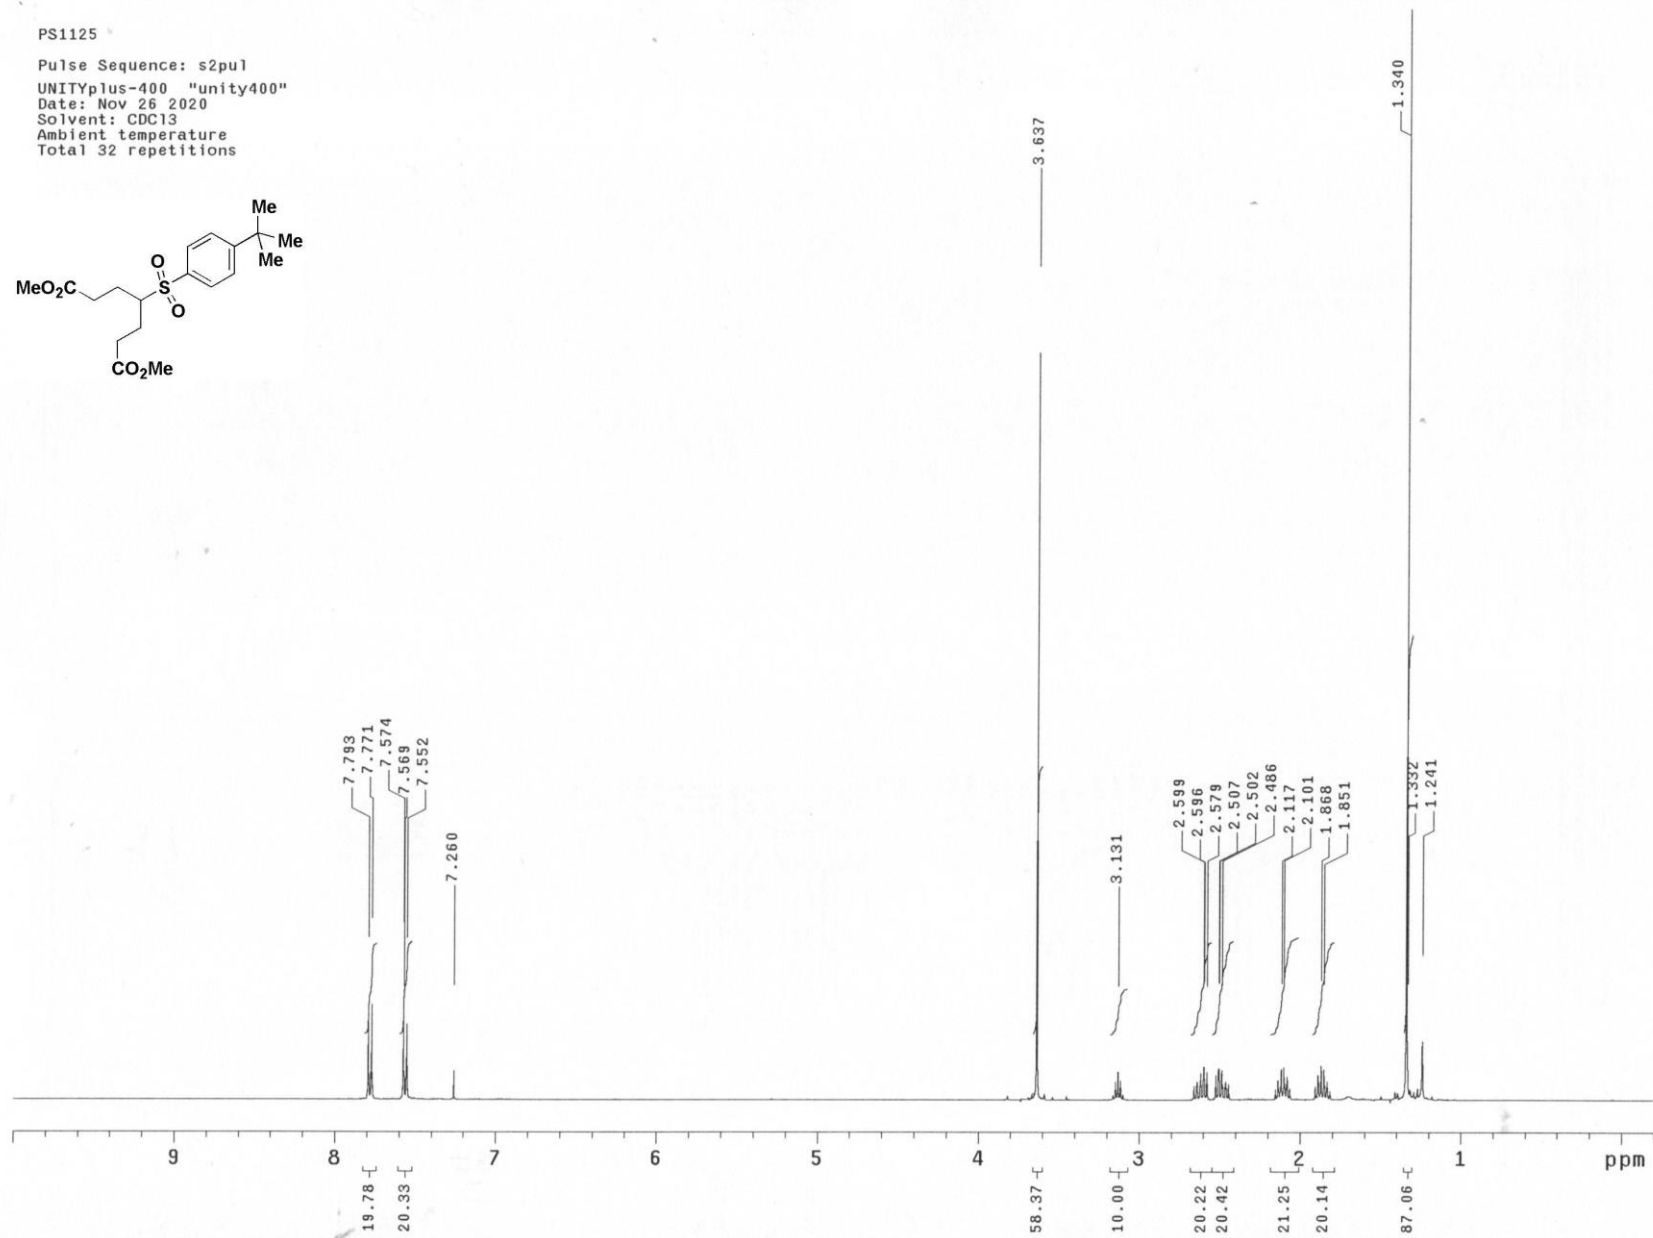

# Compound 6e (<sup>13</sup>C-NMR spectral data)

PS1125

Pulse Sequence: s2pu1  
UNITYplus-400 "unity400"  
Date: Nov 26 2020  
Solvent: CDCl<sub>3</sub>  
Ambient temperature  
Total 1088 repetitions

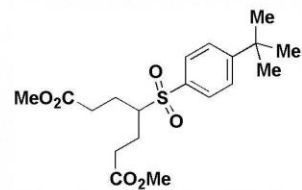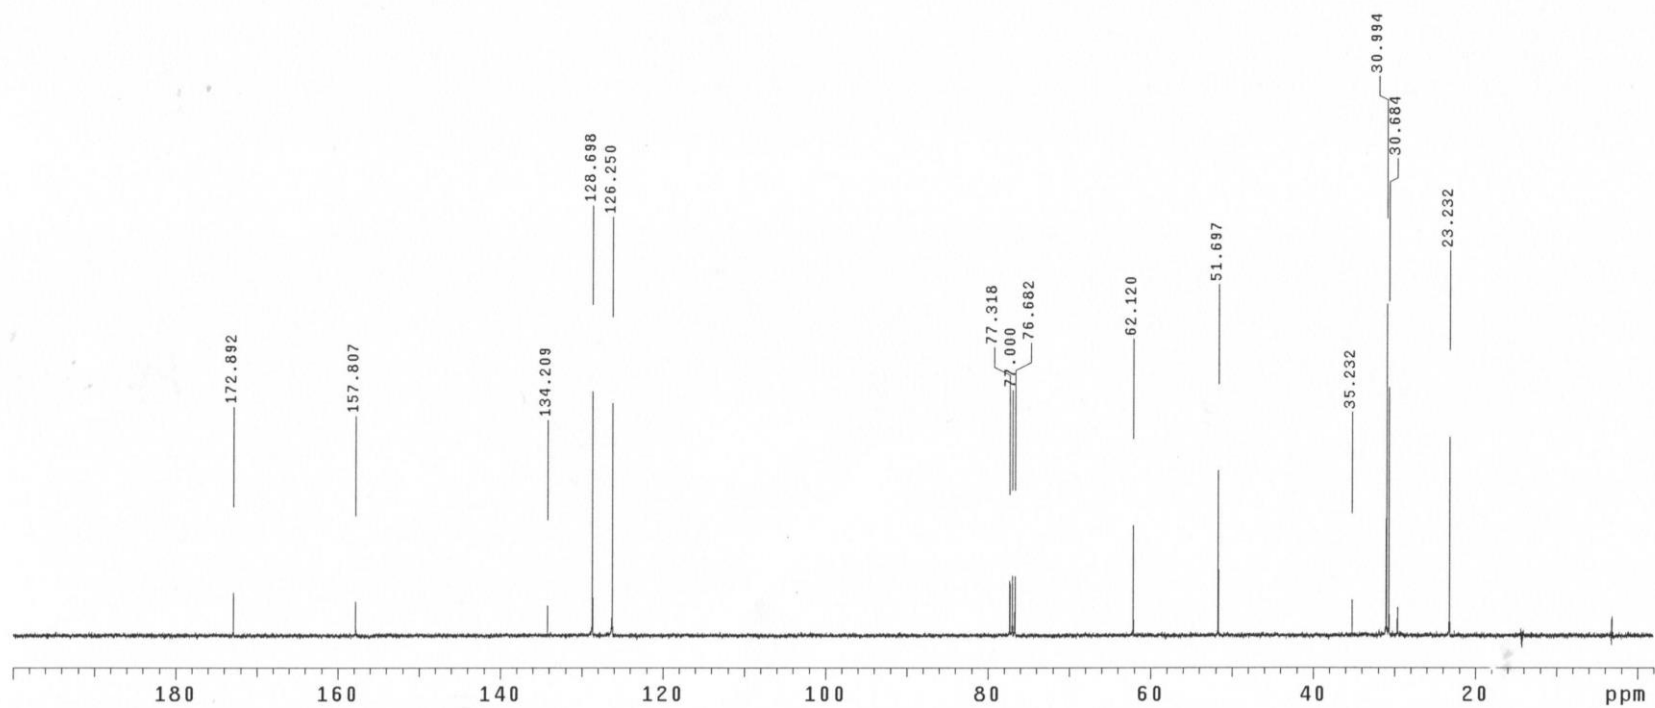

# Compound 6f (<sup>1</sup>H-NMR spectral data)

PS1126

Pulse Sequence: s2pu1

UNITYplus-400 "unity400"

Date: Nov 27 2020

Solvent: CDCl<sub>3</sub>

Ambient temperature

Total 64 repetitions

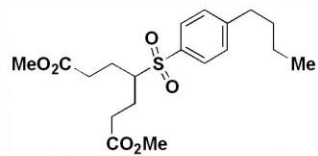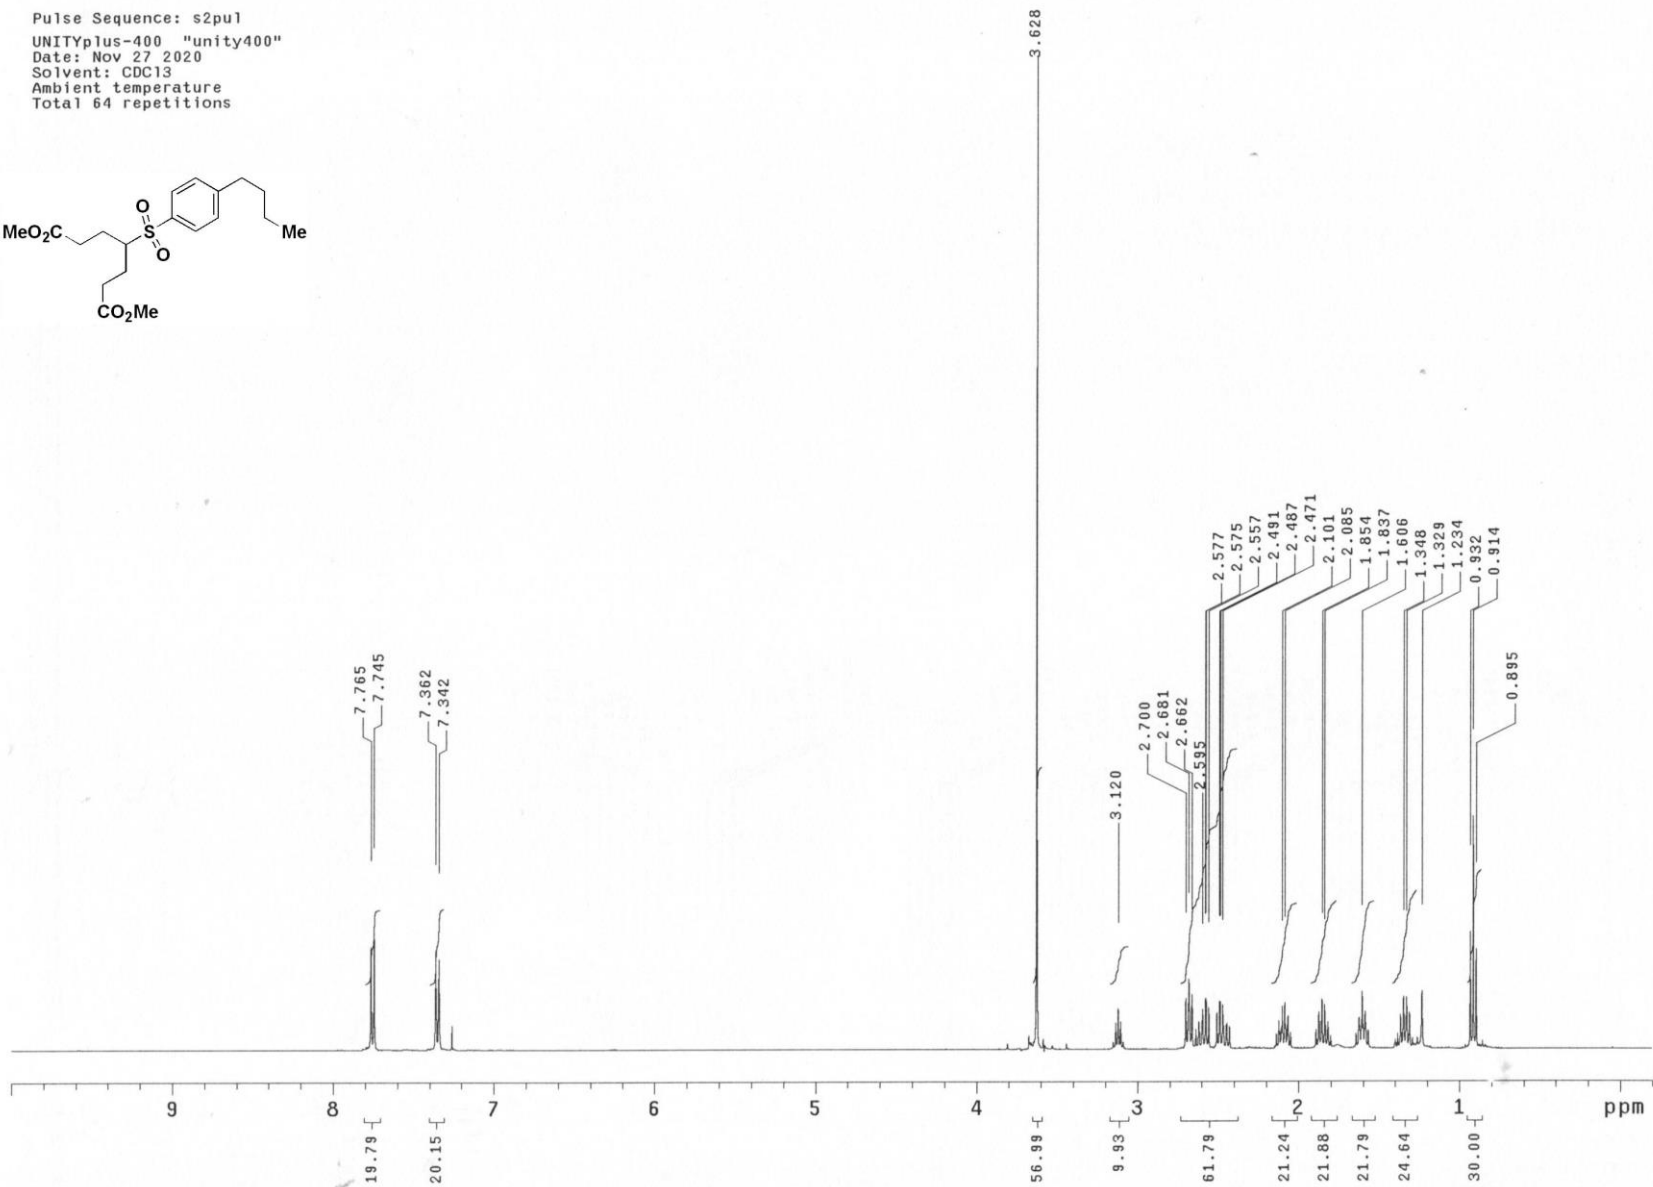



# Compound 6f (<sup>13</sup>C-NMR spectral data)

PS1126  
Pulse Sequence: s2pu1  
UNITYplus-400 "unity400"  
Date: Nov 27 2020  
Solvent: CDC13  
Ambient temperature  
Total 512 repetitions

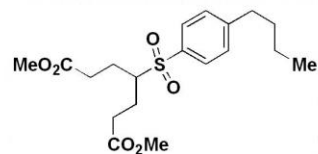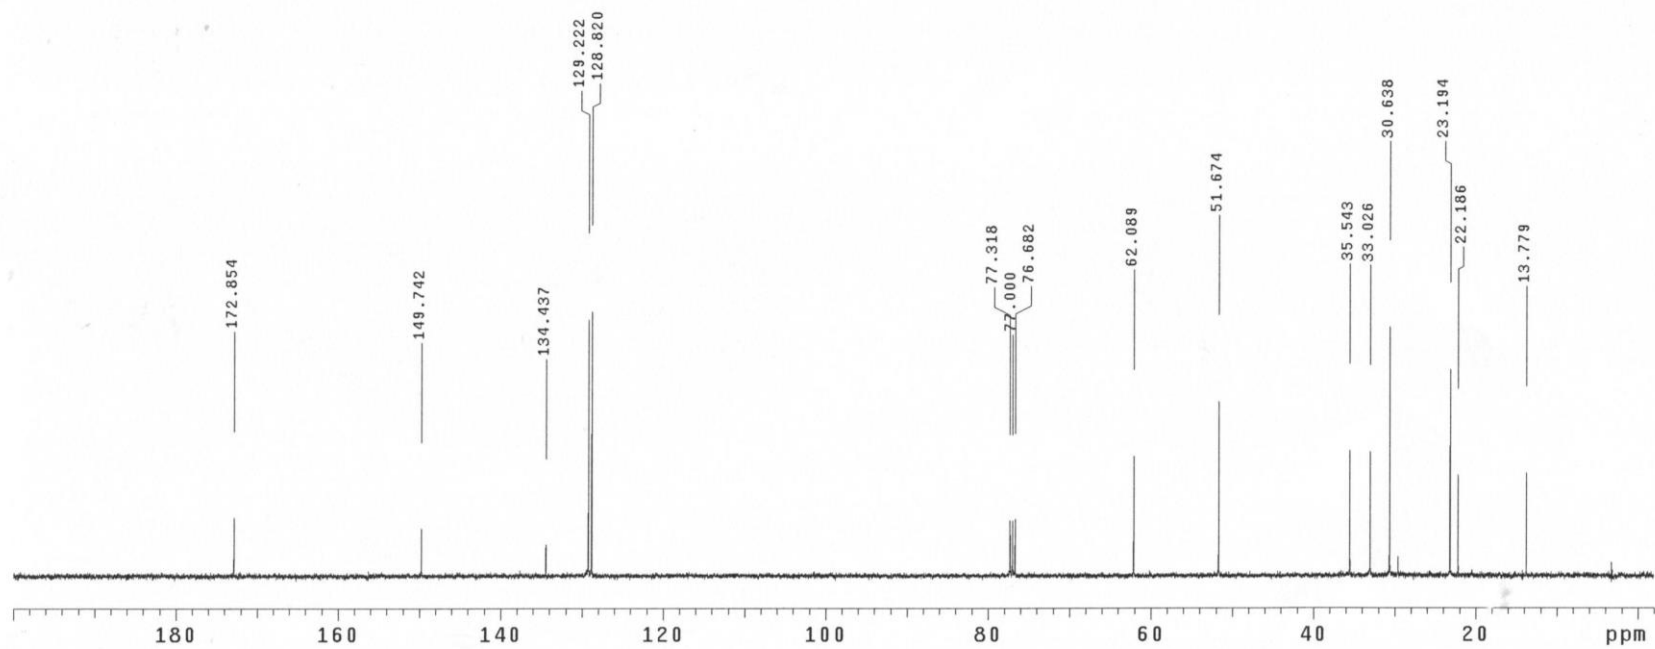

# Compound 6g (<sup>1</sup>H-NMR spectral data)

PS1112

Pulse Sequence: s2pu1  
UNITYplus-400 "unity400"  
Date: Nov 13 2020  
Solvent: CDCl<sub>3</sub>  
Ambient temperature  
Total 32 repetitions

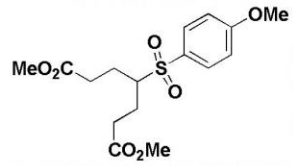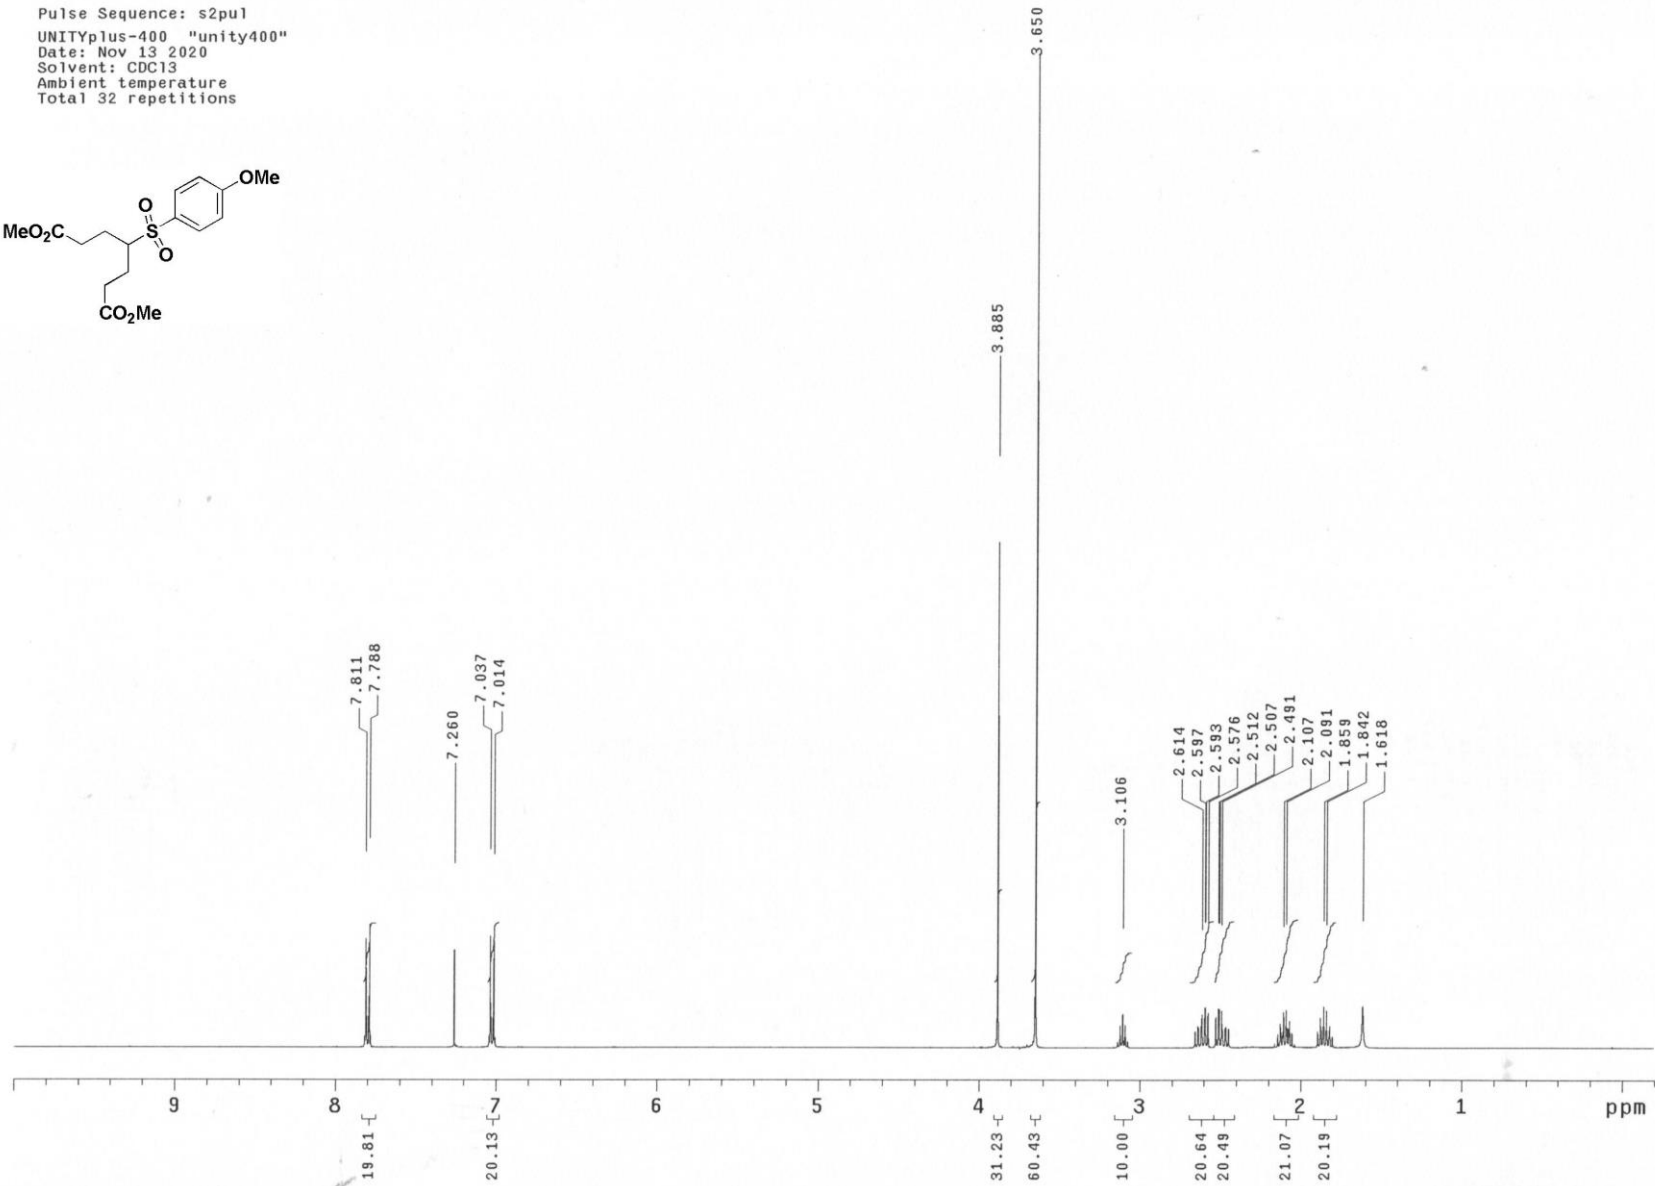

# Compound 6g (<sup>13</sup>C-NMR spectral data)

PS1112

Pulse Sequence: s2pu1

UNITYplus-400 "unity400"

Date: Nov 13 2020

Solvent: CDCl<sub>3</sub>

Ambient temperature

Total 2336 repetitions

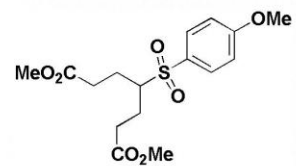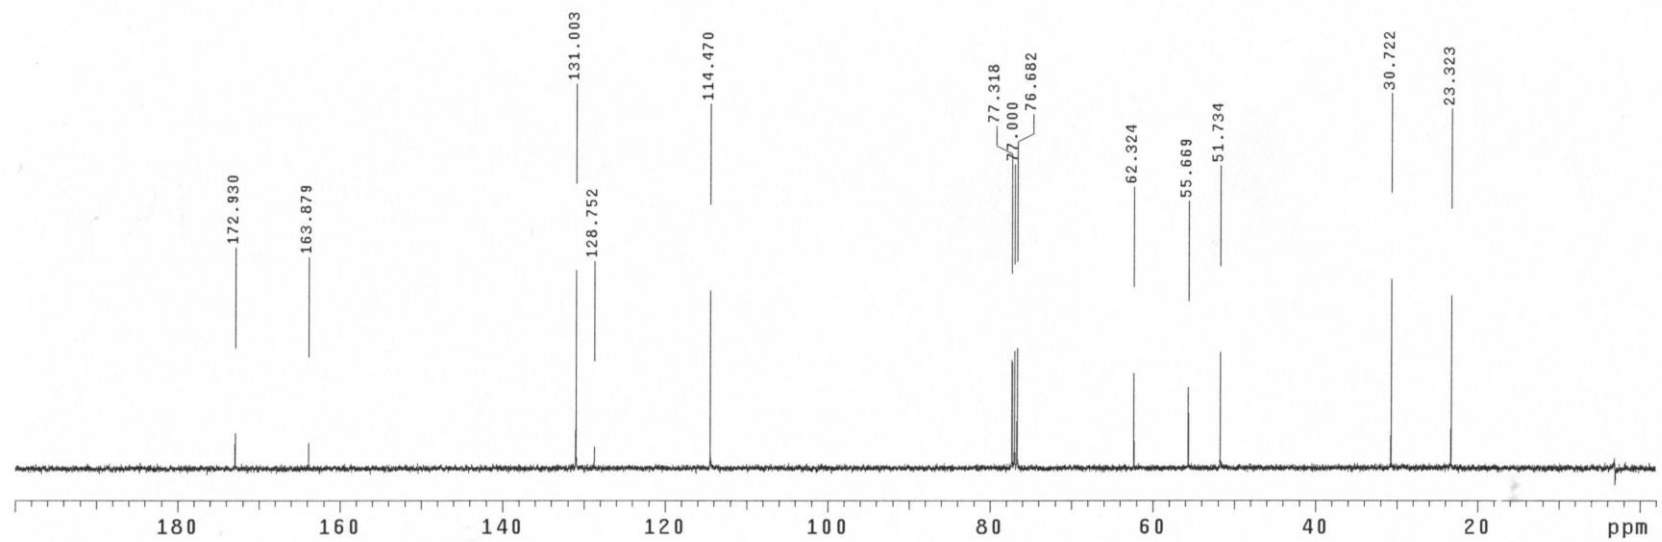

# Compound 6h (<sup>1</sup>H-NMR spectral data)

PS1117  
Pulse Sequence: s2pu1  
UNITYplus-400 "unity400"  
Date: Nov 19 2020  
Solvent: CDCl3  
Ambient temperature  
Total 32 repetitions

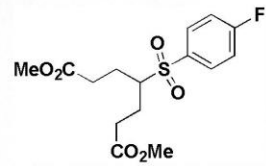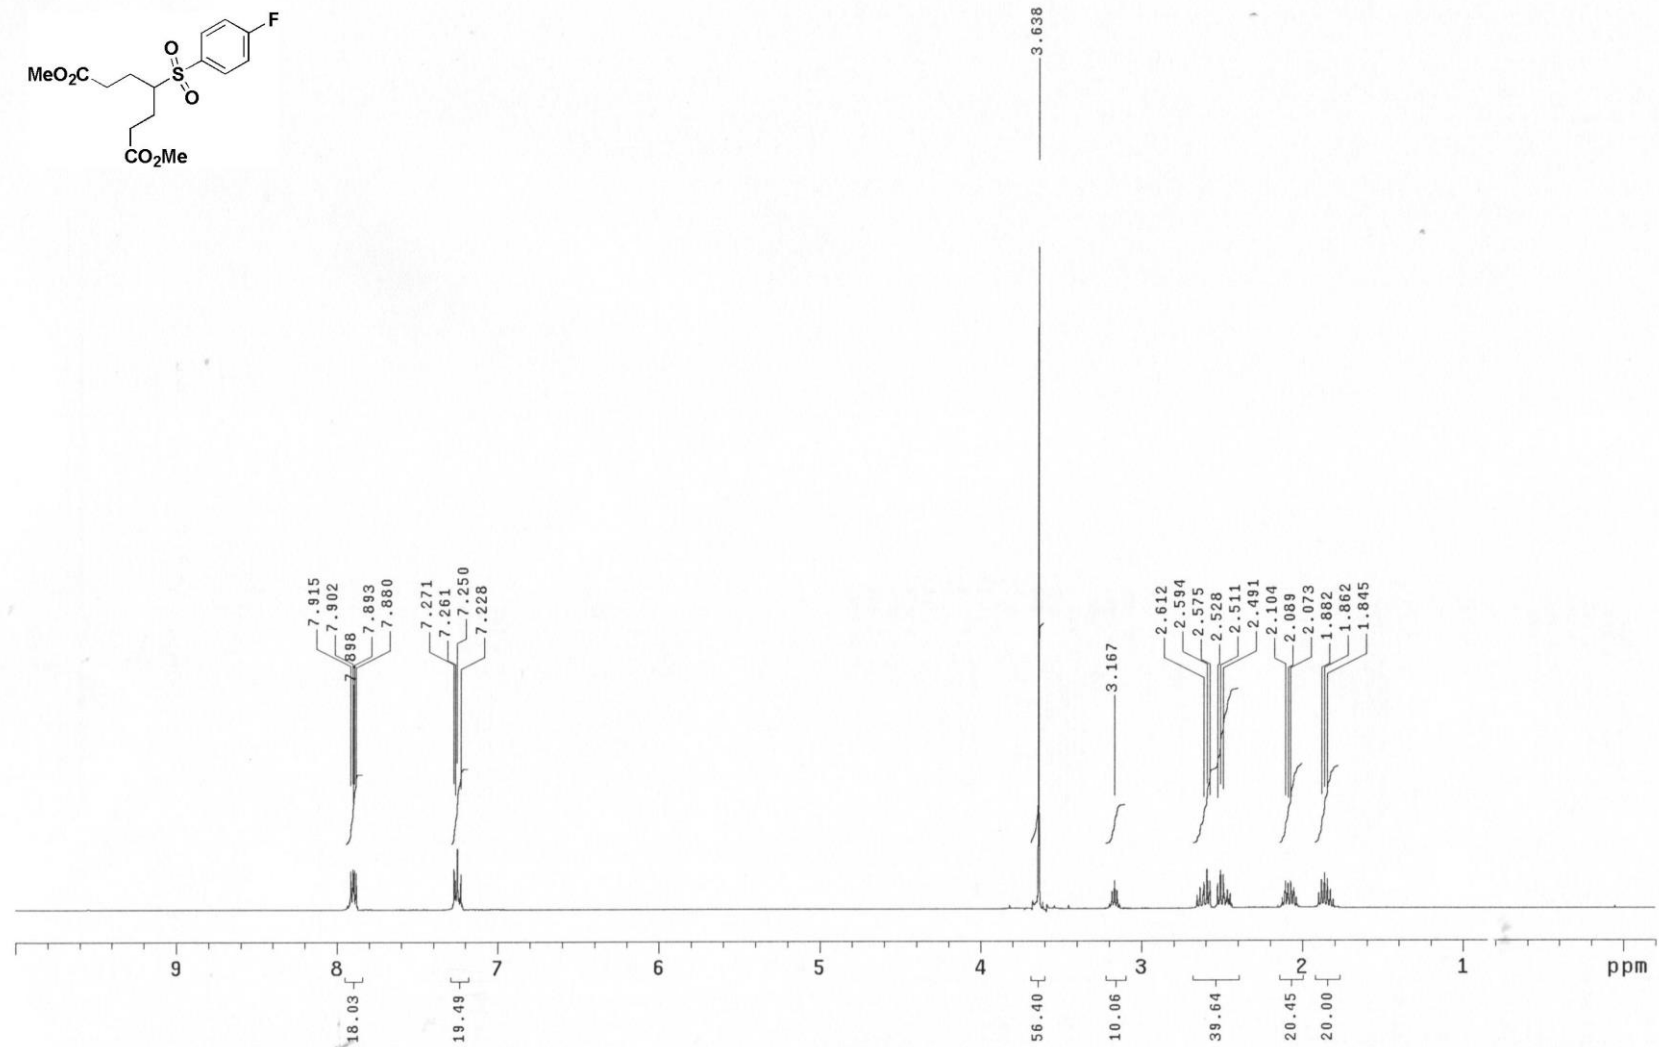

# Compound 6h (<sup>13</sup>C-NMR spectral data)

Pulse Sequence: s2pu1  
UNITYplus-400 "unity400"  
Date: Nov 19 2020  
Solvent: CDCl<sub>3</sub>  
Ambient temperature  
Total 1408 repetitions

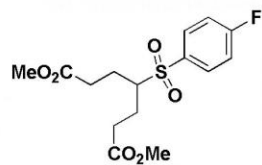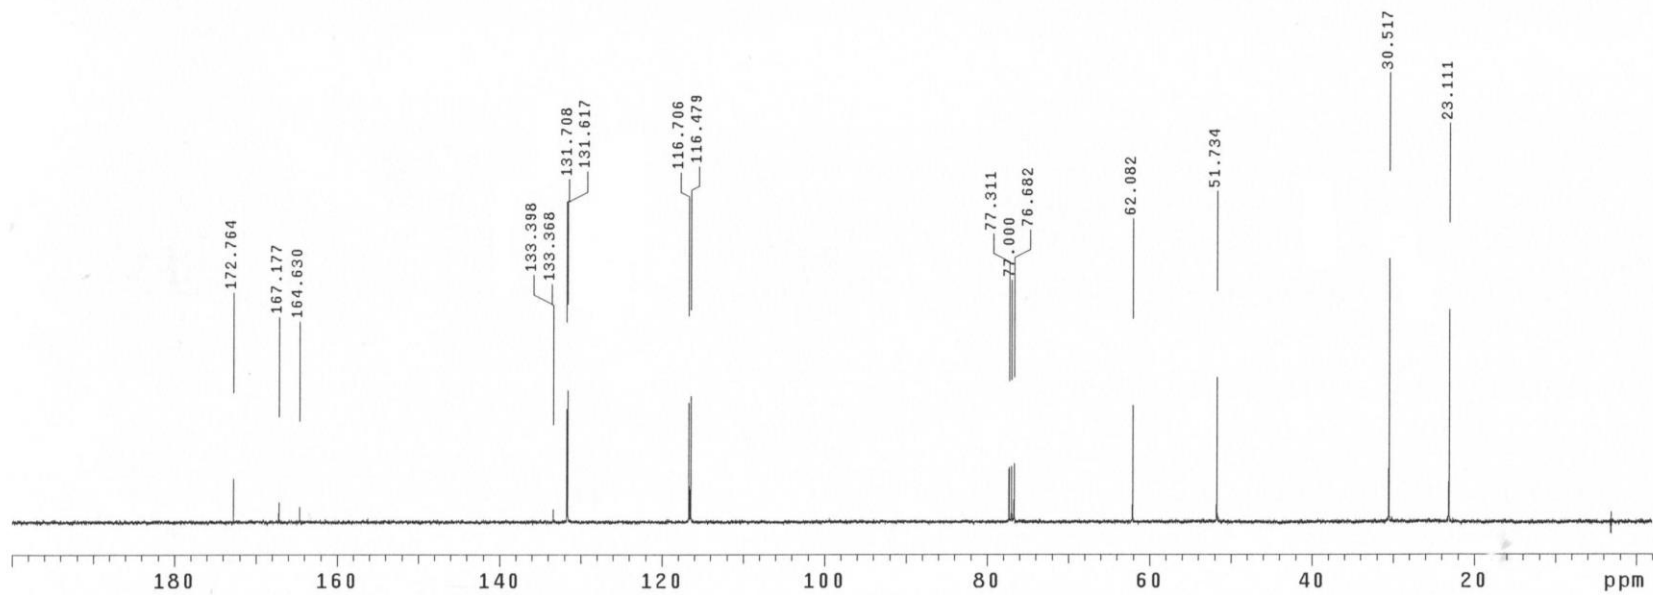

# Compound 6i (<sup>1</sup>H-NMR spectral data)

PS1201

Pulse Sequence: s2pu1

UNITYplus-400 "unity400"

Date: Dec 2 2020

Solvent: CDCl<sub>3</sub>

Ambient temperature

Total 32 repetitions

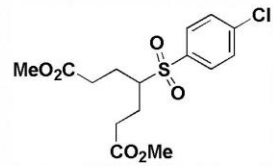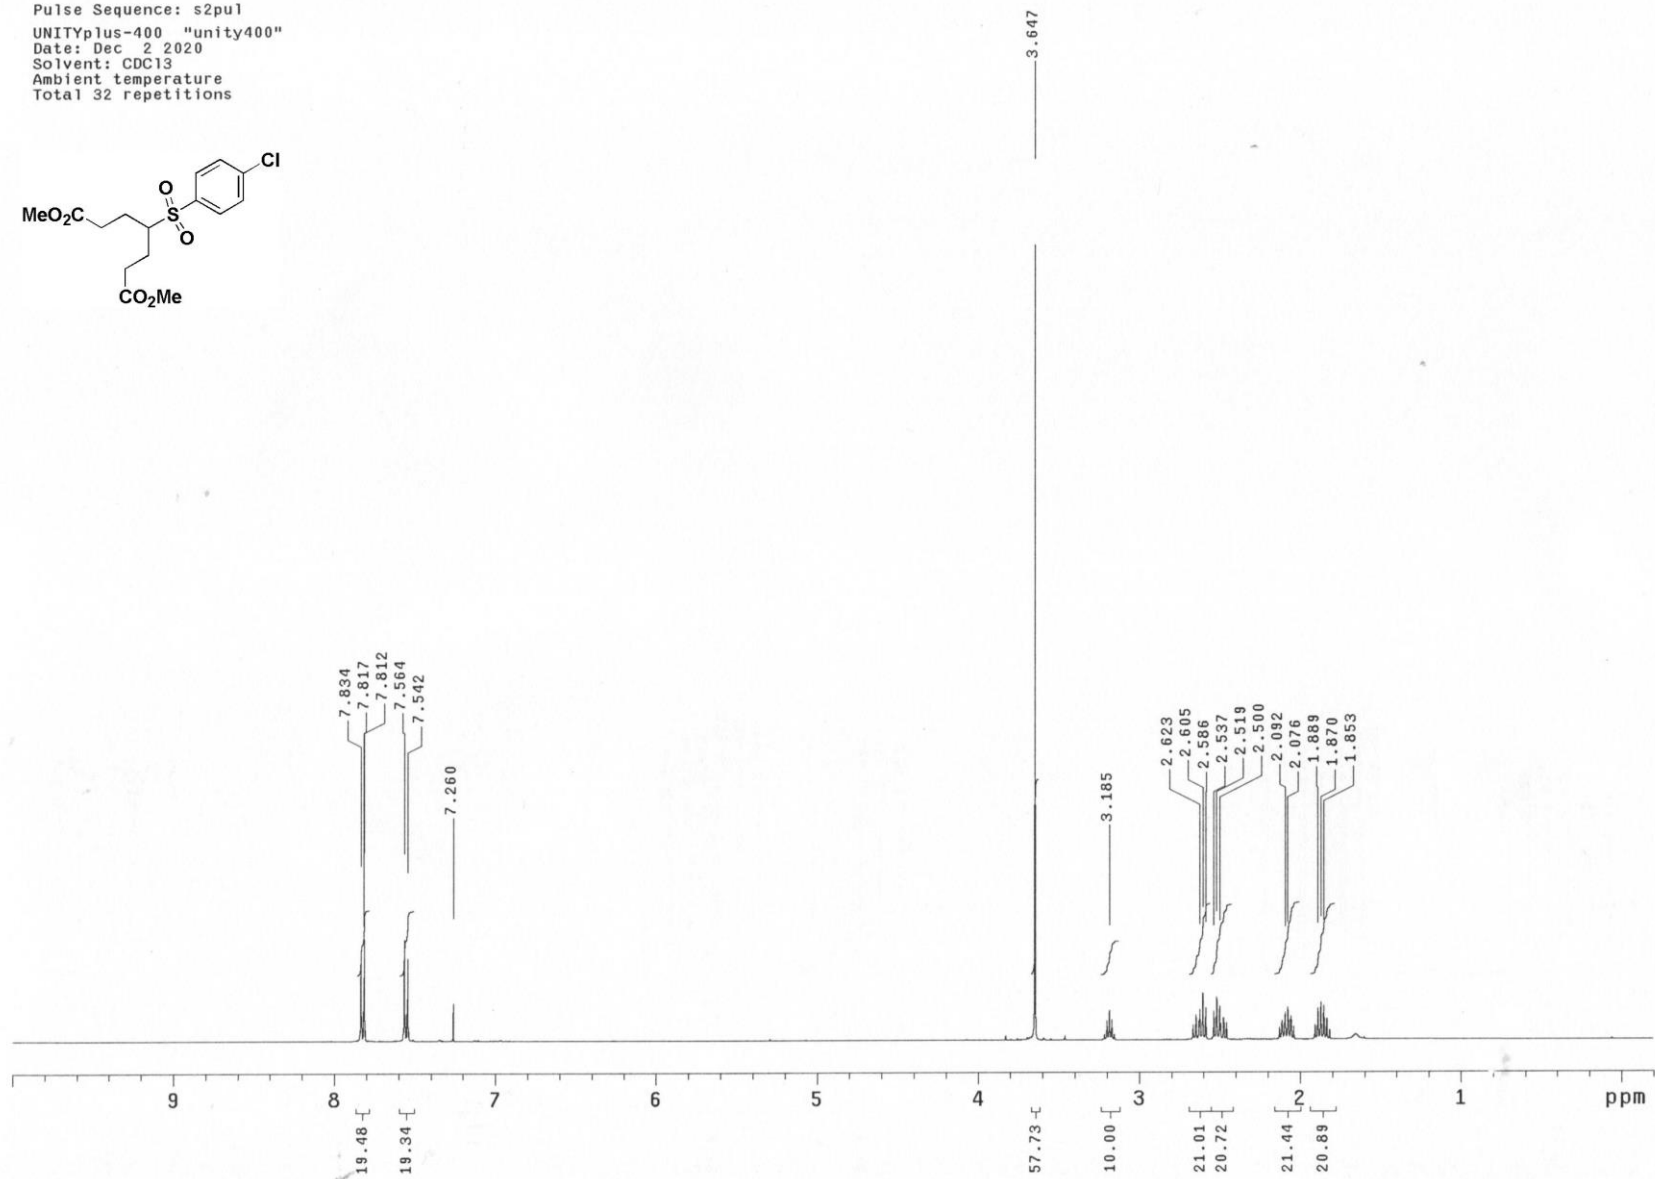

# Compound 6i (<sup>13</sup>C-NMR spectral data)

PS1201

Pulse Sequence: s2pu1  
UNITYplus-400 "unity400"  
Date: Dec 2 2020  
Solvent: CDCl<sub>3</sub>  
Ambient temperature  
Total 1792 repetitions

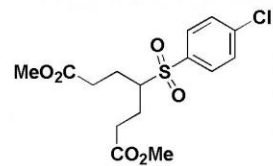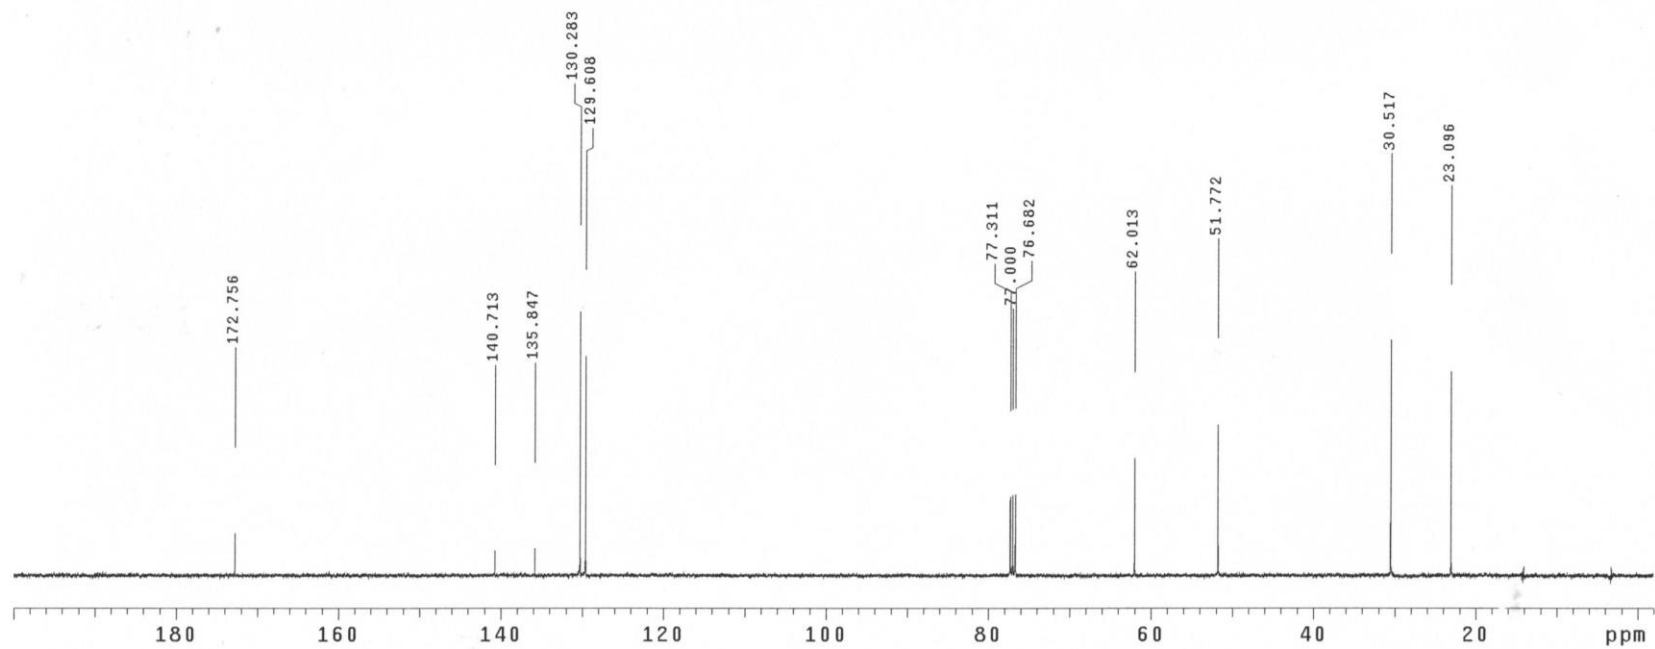

# Compound 6j (<sup>1</sup>H-NMR spectral data)

PS1202  
Pulse Sequence: s2pu1  
UNITYplus-400 "unity400"  
Date: Dec 3 2020  
Solvent: CDCl<sub>3</sub>  
Ambient temperature  
Total 32 repetitions

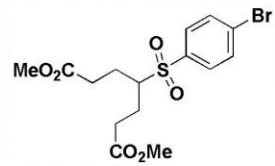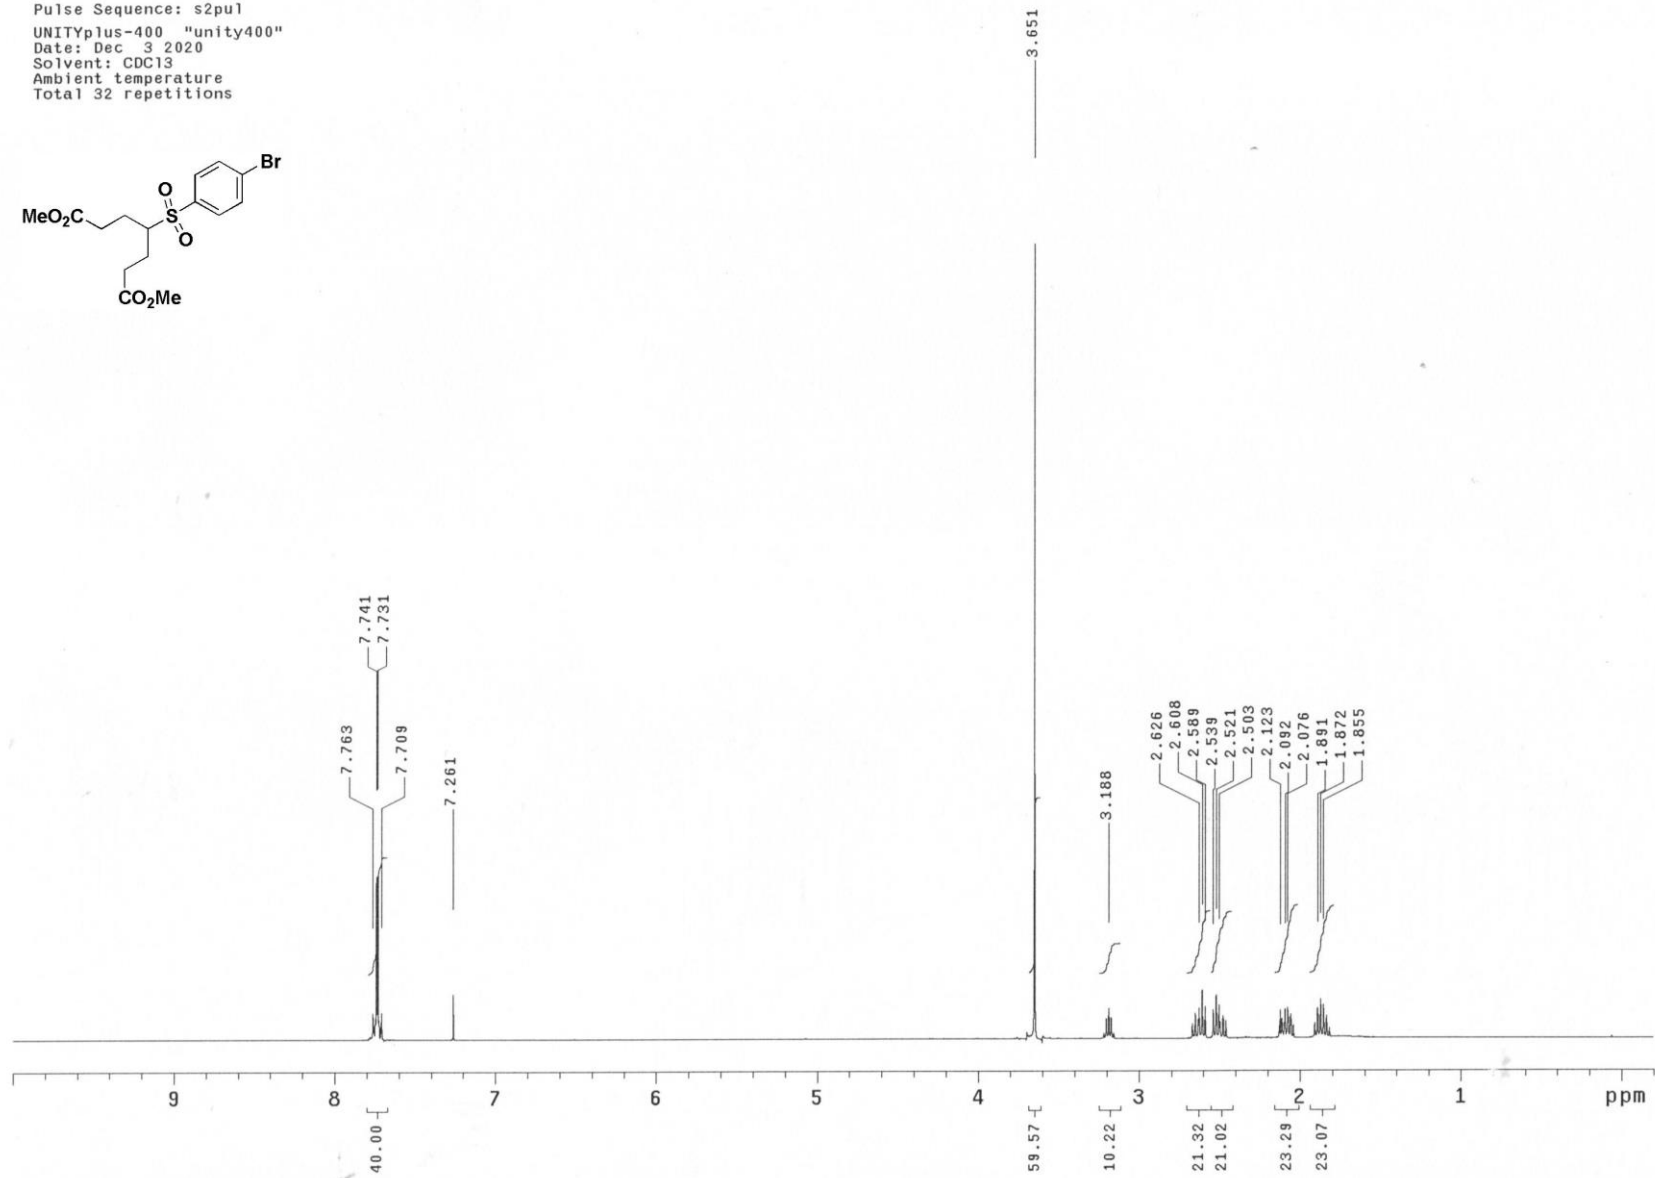



# Compound 6j (<sup>13</sup>C-NMR spectral data)

PS1202

Pulse Sequence: s2pu1

UNITYplus-400 "unity400"

Date: Dec 3 2020

Solvent: CDCl<sub>3</sub>

Ambient temperature

Total 1024 repetitions

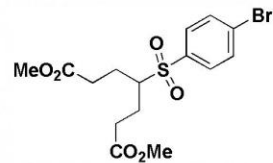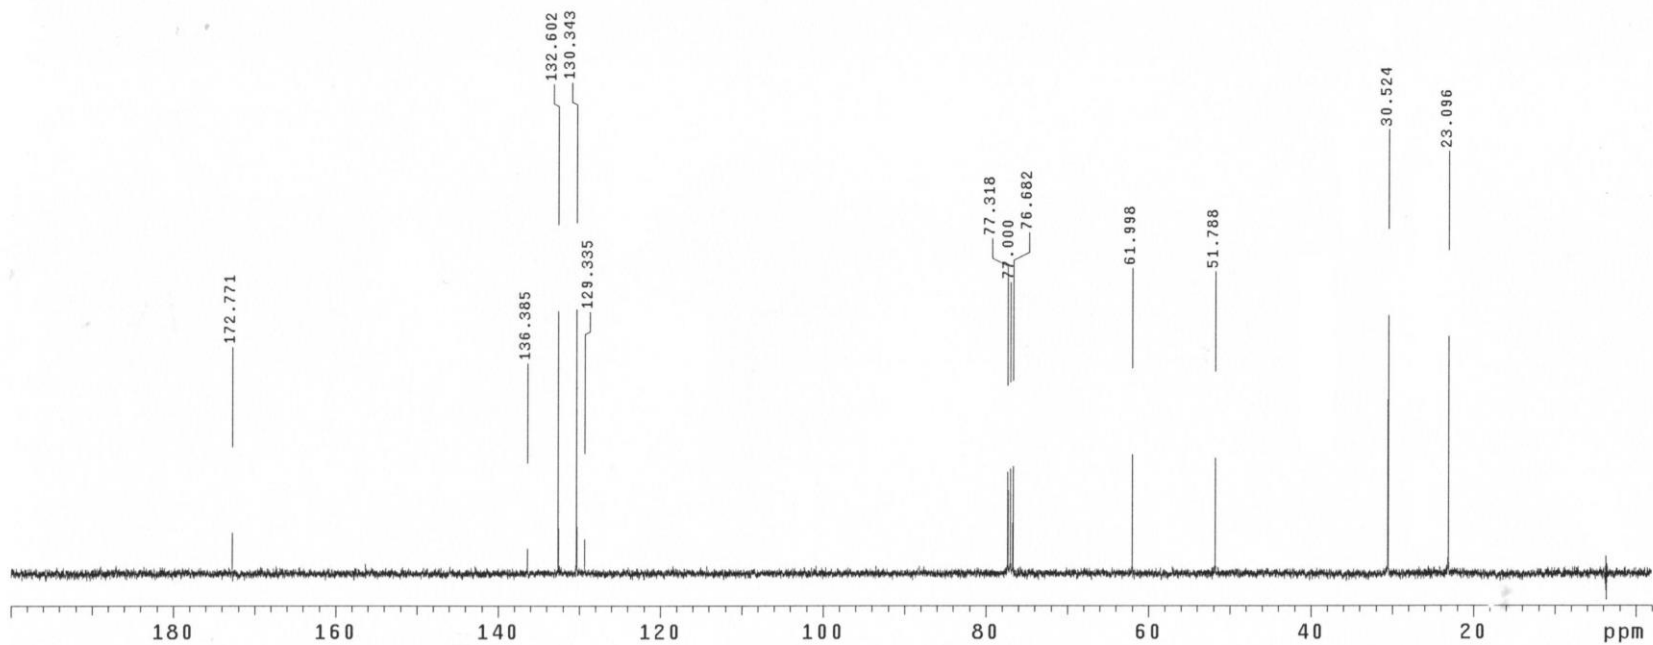

# Compound 6k (<sup>1</sup>H-NMR spectral data)

PS1217k

Pulse Sequence: s2pu1

UNITYplus-400 "unity400"

Date: Dec 17 2020

Solvent: CDCl<sub>3</sub>

Ambient temperature

Total 160 repetitions

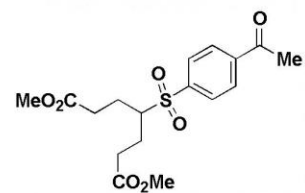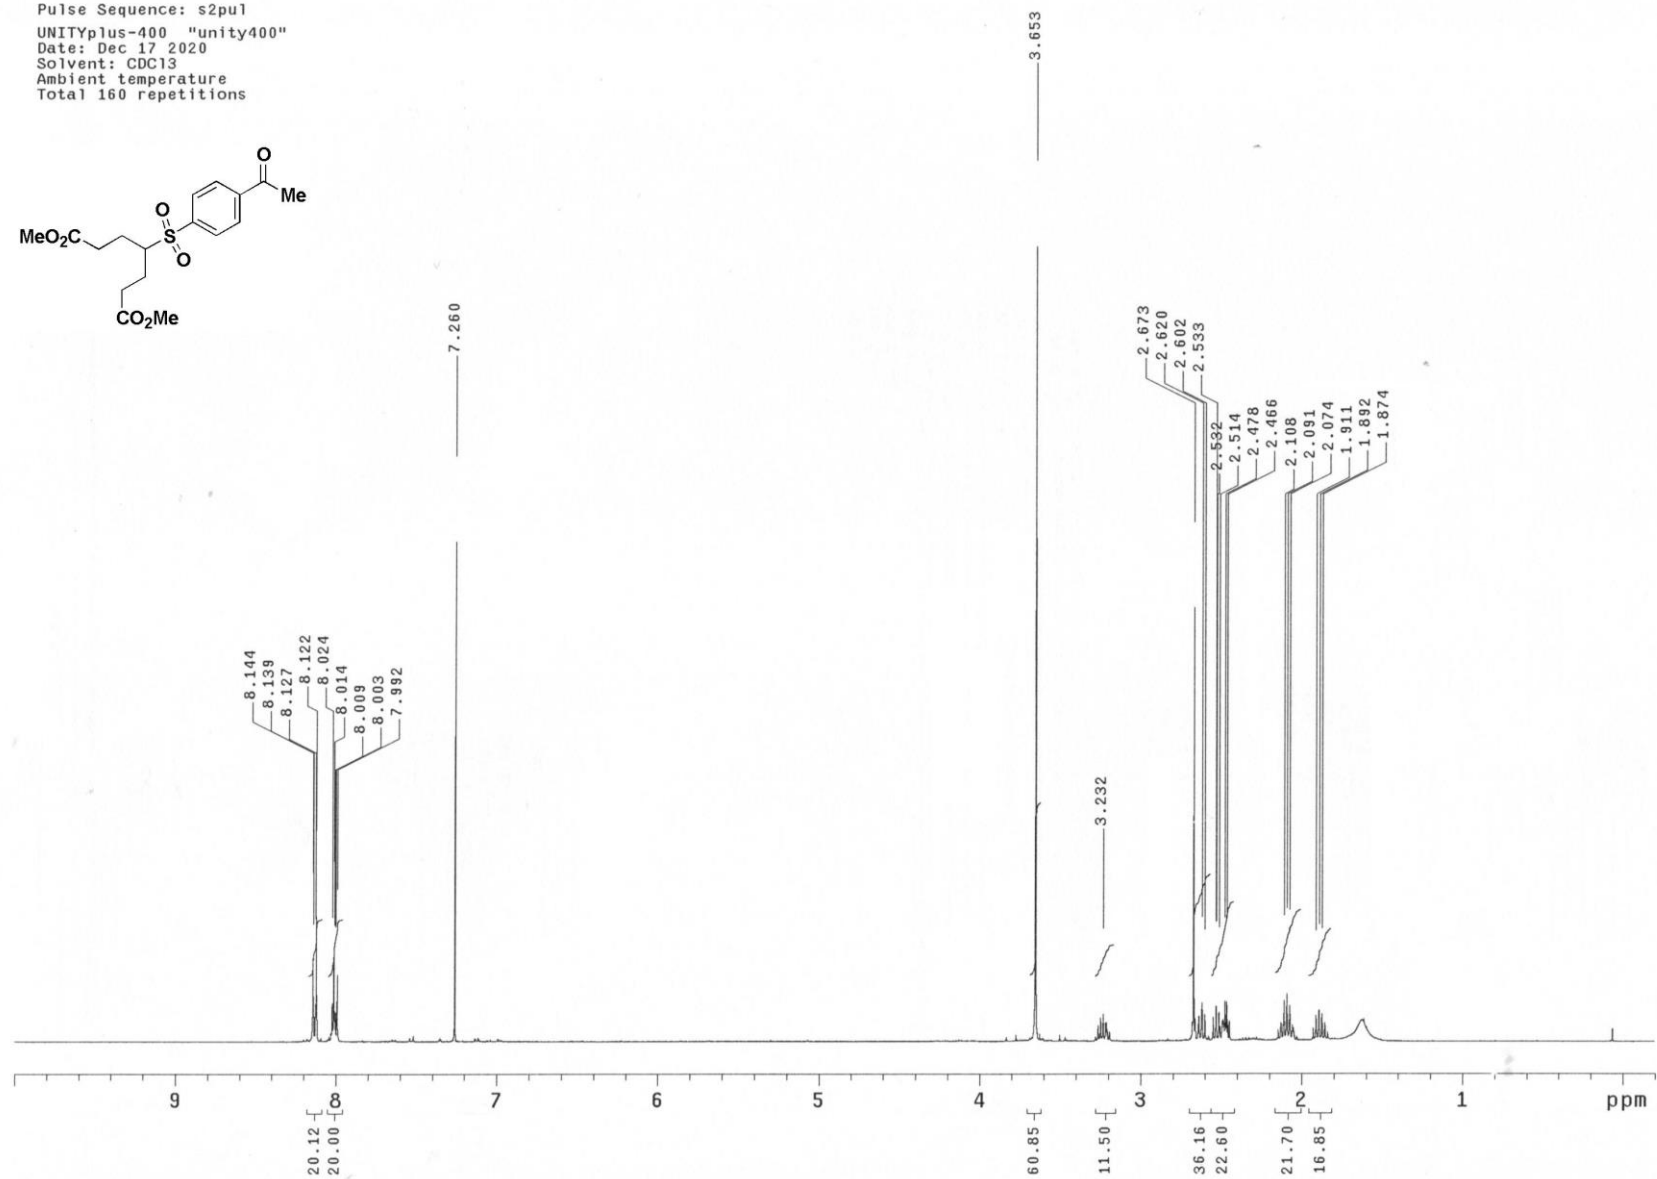

# Compound 6k (<sup>13</sup>C-NMR spectral data)

PS1217k

Pulse Sequence: s2pu1

UNITYplus-400 "unity400"

Date: Dec 17 2020

Solvent: CDCl<sub>3</sub>

Ambient temperature

Total 37184 repetitions

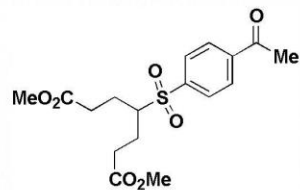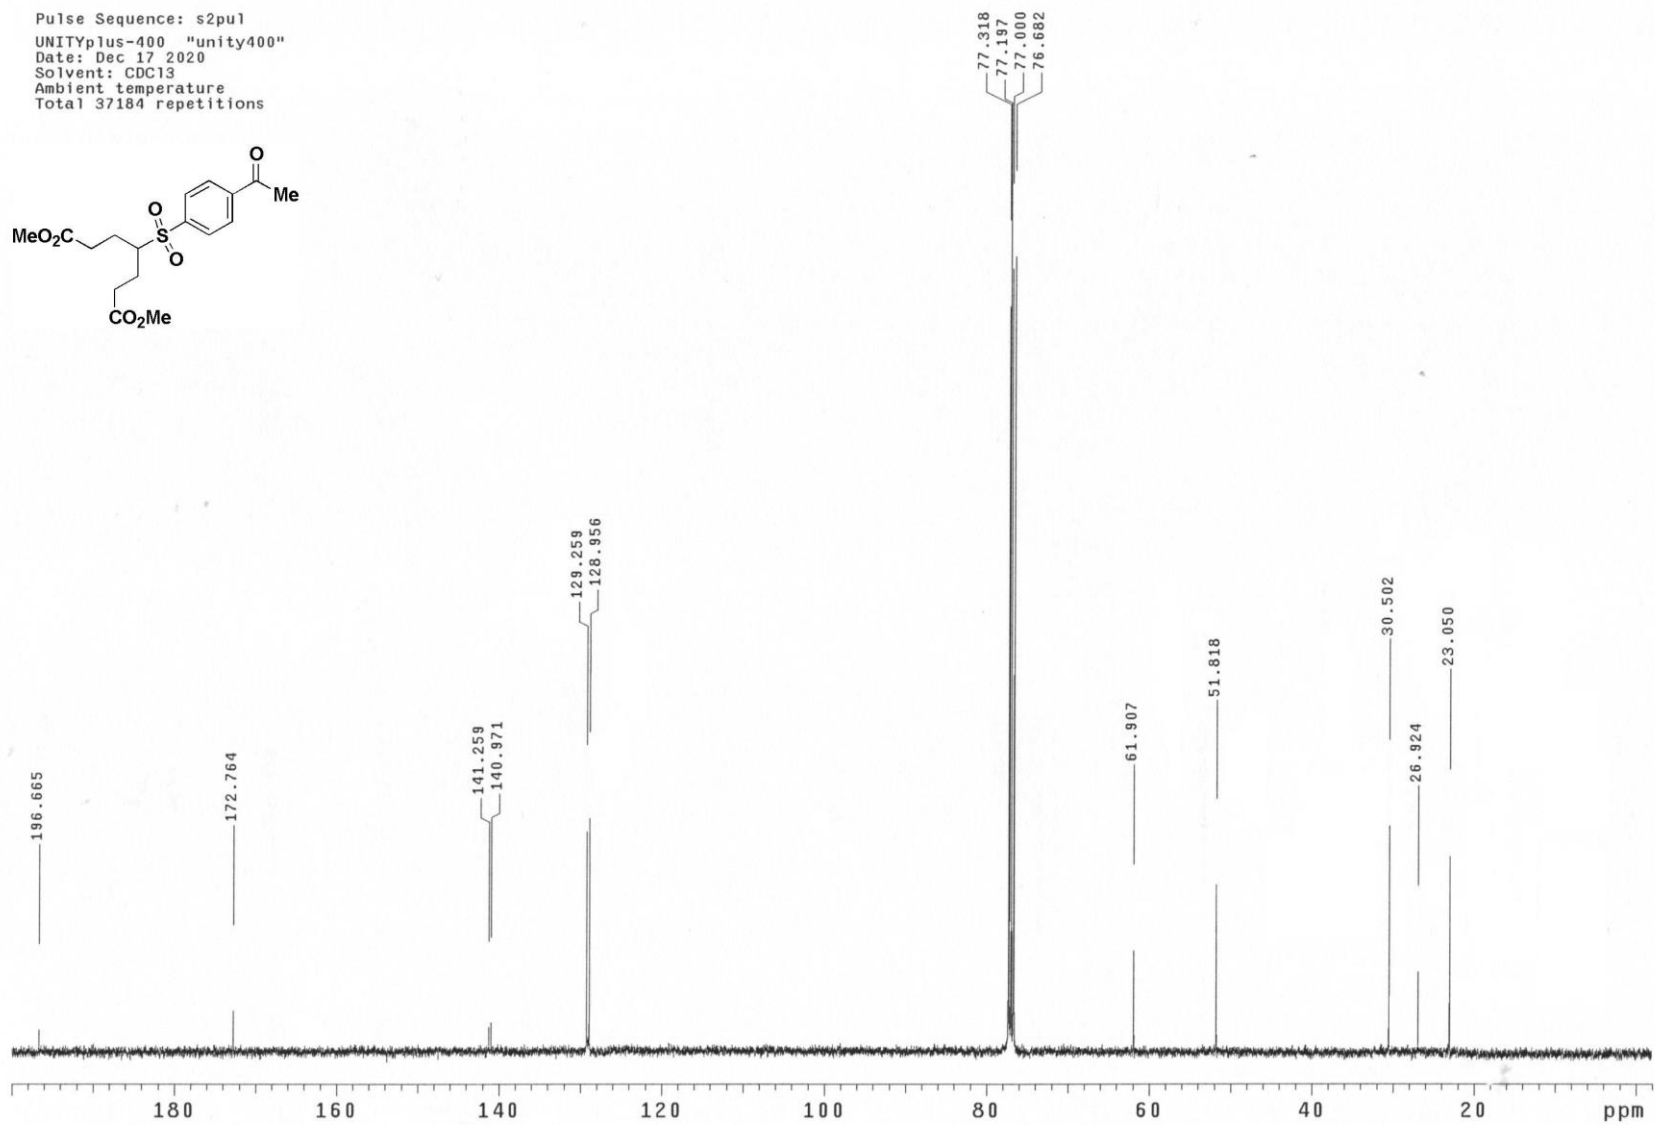

# Compound 6I (<sup>1</sup>H-NMR spectral data)

PS1203

Pulse Sequence: s2pu1

UNITYplus-400 "unity400"

Date: Dec 4 2020

Solvent: CDC13

Ambient temperature

Total 32 repetitions

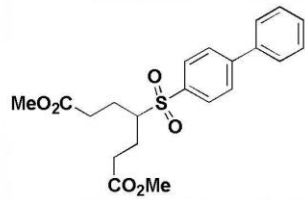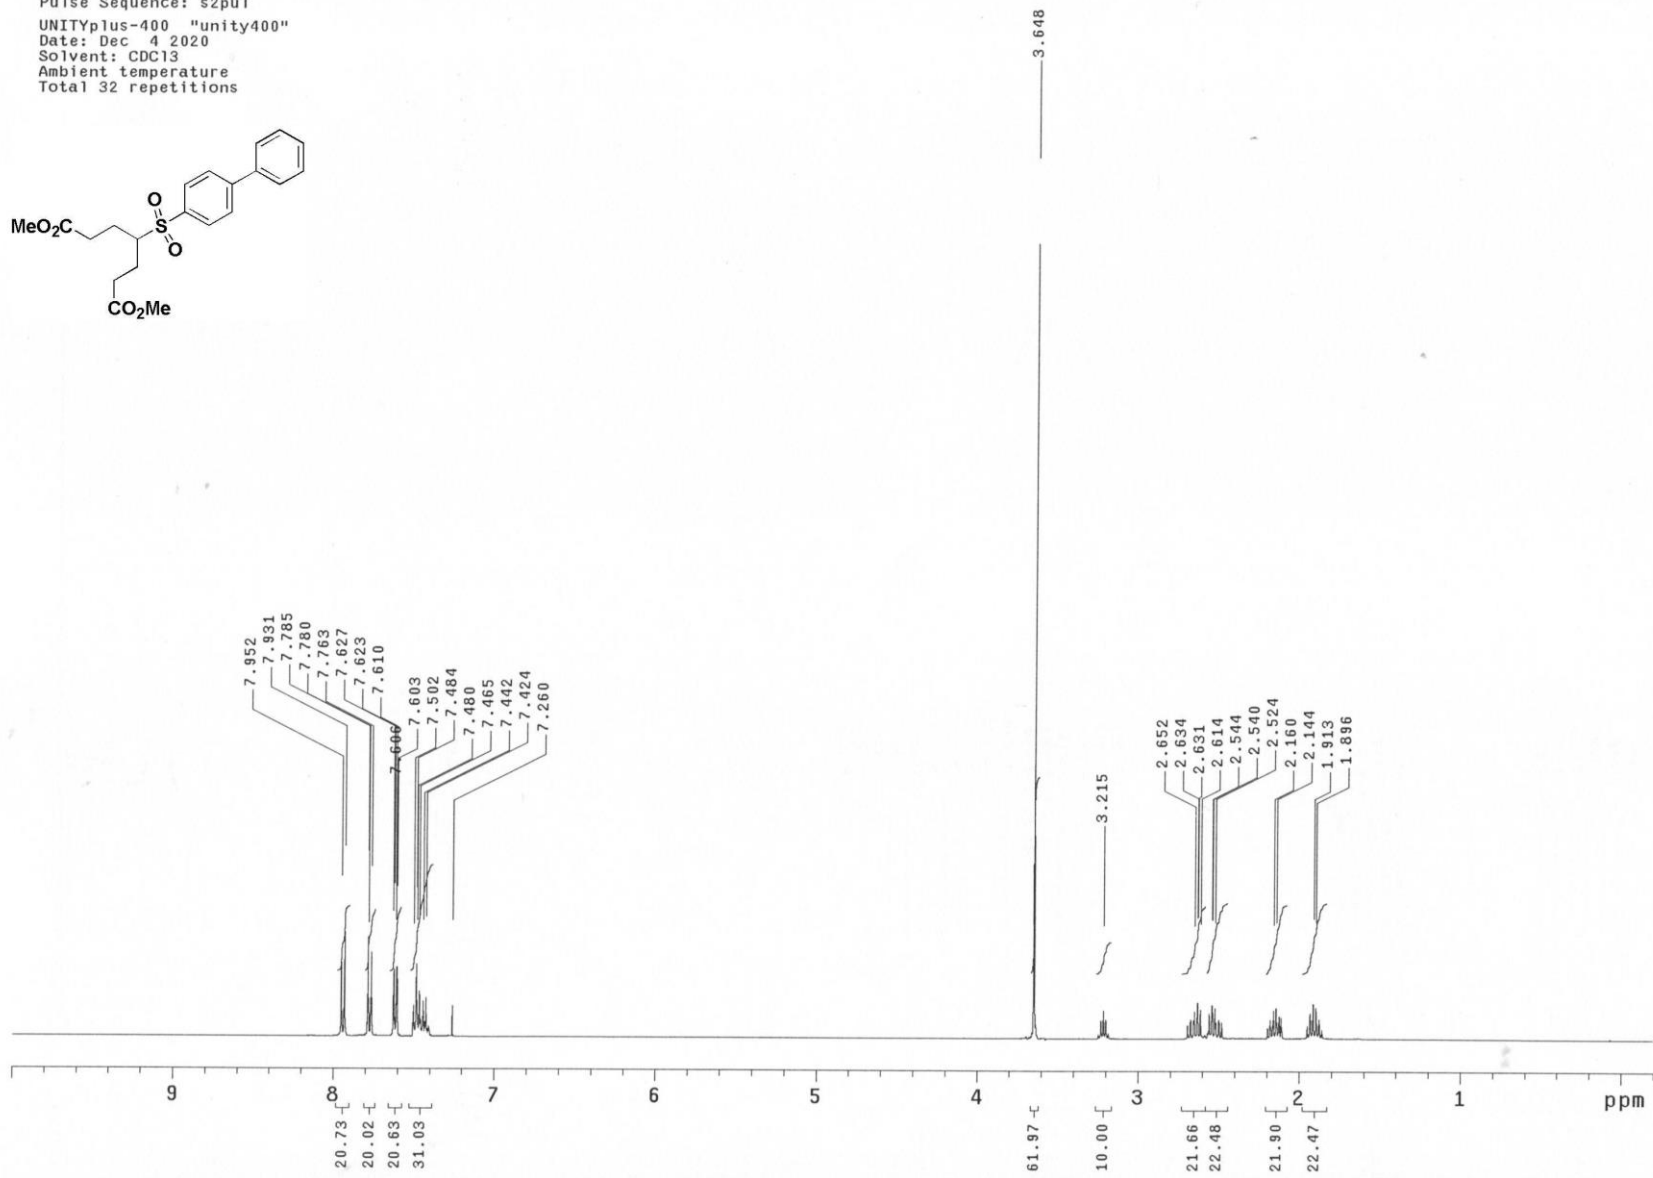

# Compound 6I (<sup>13</sup>C-NMR spectral data)

PS1203

Pulse Sequence: s2pu1

UNITYplus-400 "unity400"

Date: Dec 4 2020

Solvent: CDC13

Ambient temperature

Total 1392 repetitions

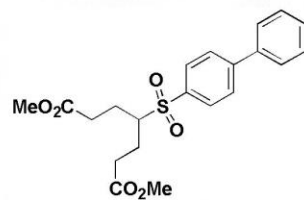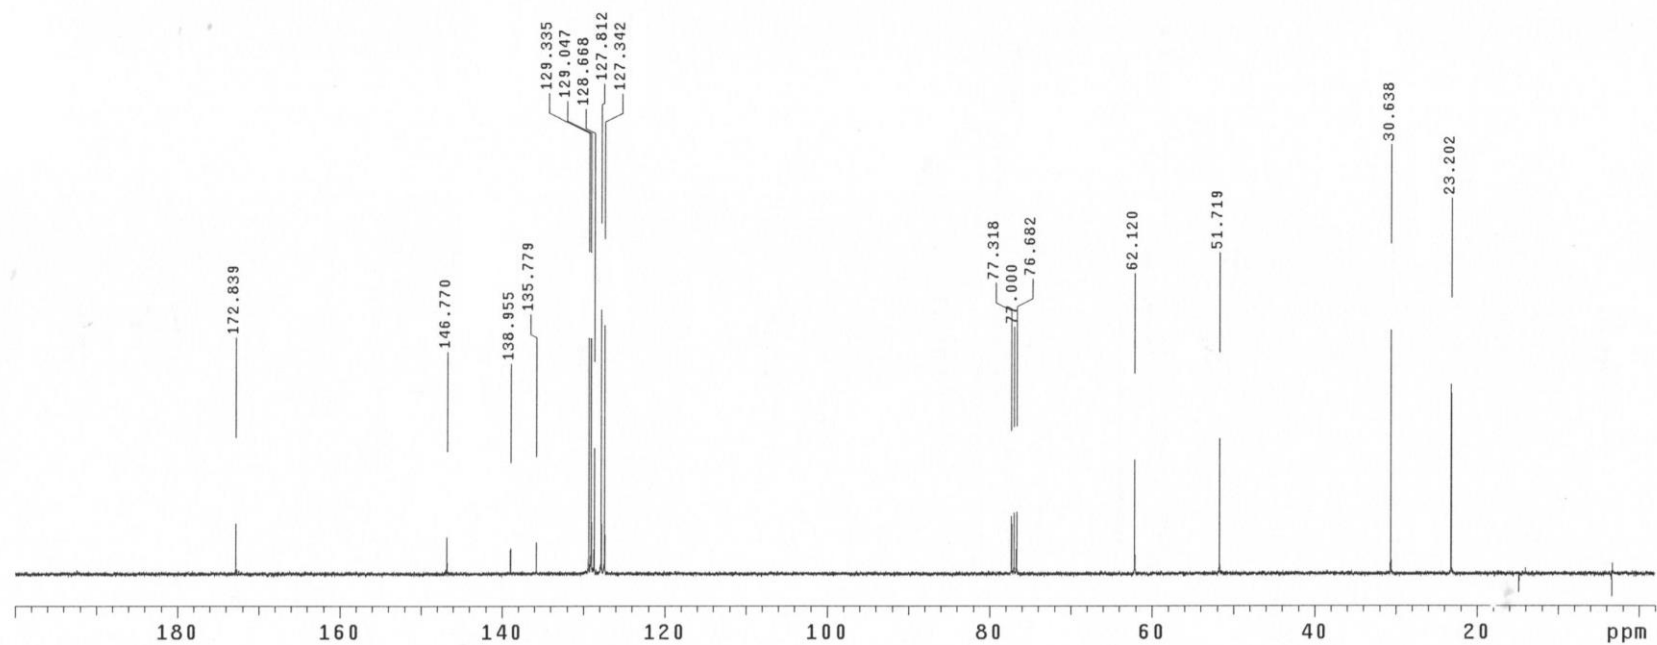

# Compound 6m (<sup>1</sup>H-NMR spectral data)

PS1208

Pulse Sequence: s2pu1

UNITYplus-400 "unity400"

Date: Dec 9 2020

Solvent: CDCl<sub>3</sub>

Ambient temperature

Total 32 repetitions

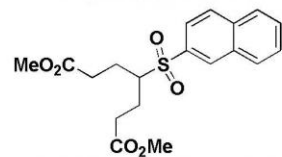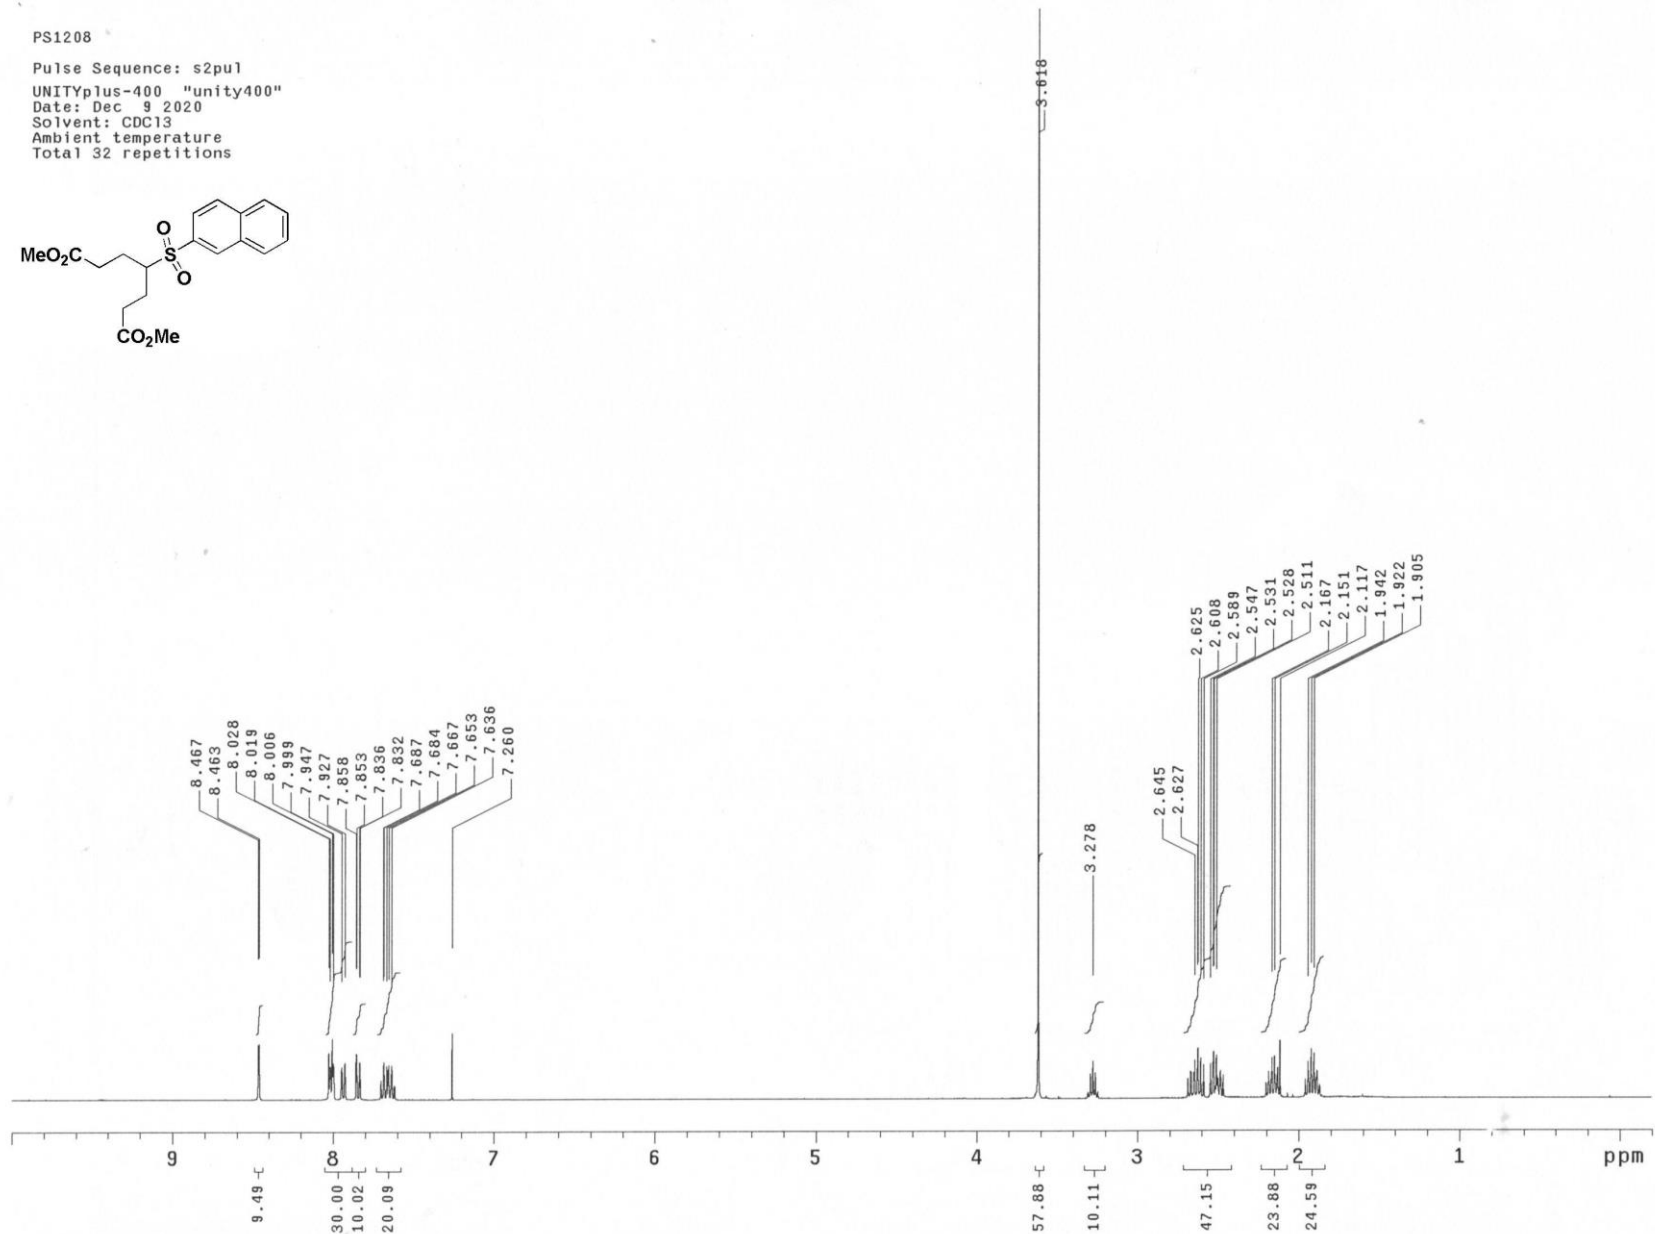

# Compound 6m (<sup>13</sup>C-NMR spectral data)

PS1208

Pulse Sequence: s2pu1

UNITYplus-400 "unity400"

Date: Dec 9 2020

Solvent: CDCl<sub>3</sub>

Ambient temperature

Total 1712 repetitions

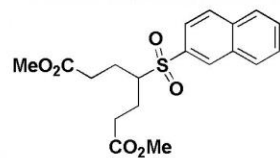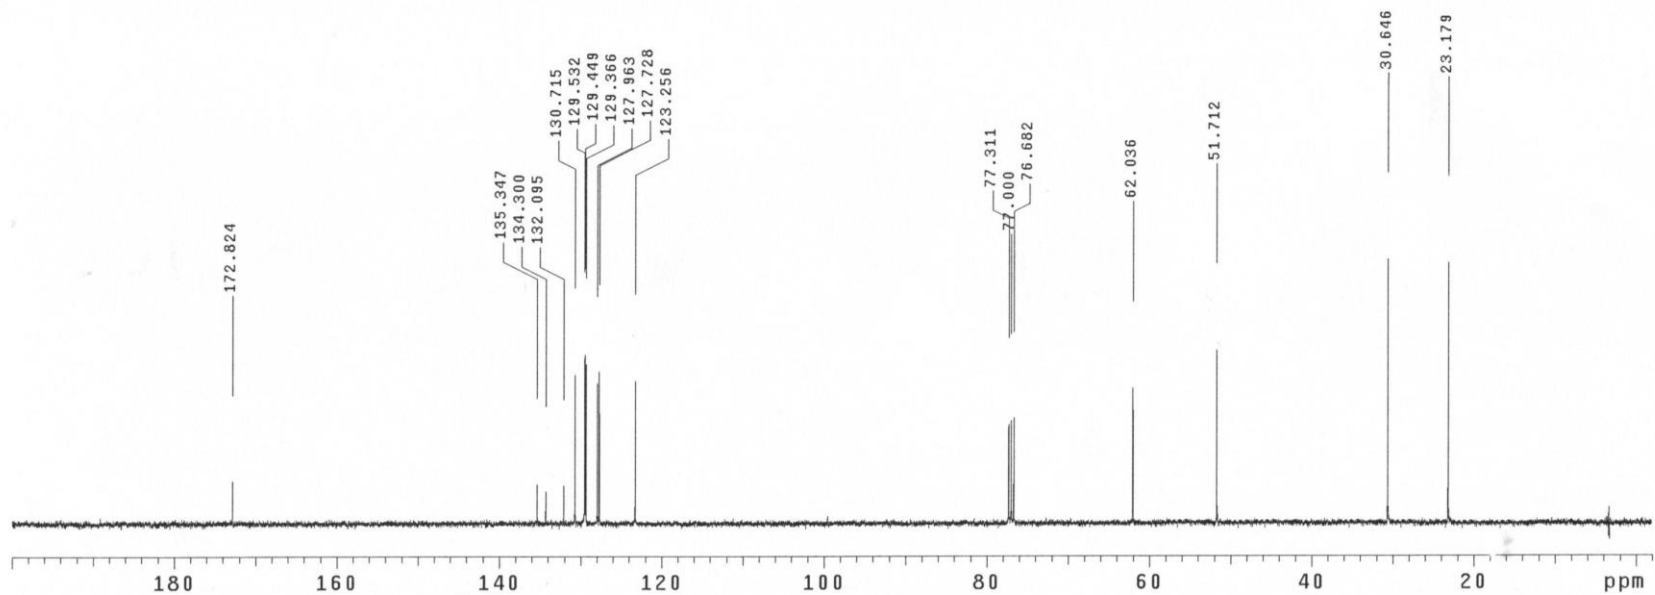

# Compound 6n (<sup>1</sup>H-NMR spectral data)

PS1210  
Pulse Sequence: s2pu1  
UNITYplus-400 "unity400"  
Date: Dec 11 2020  
Solvent: CDCl3  
Ambient temperature  
Total 32 repetitions

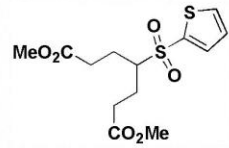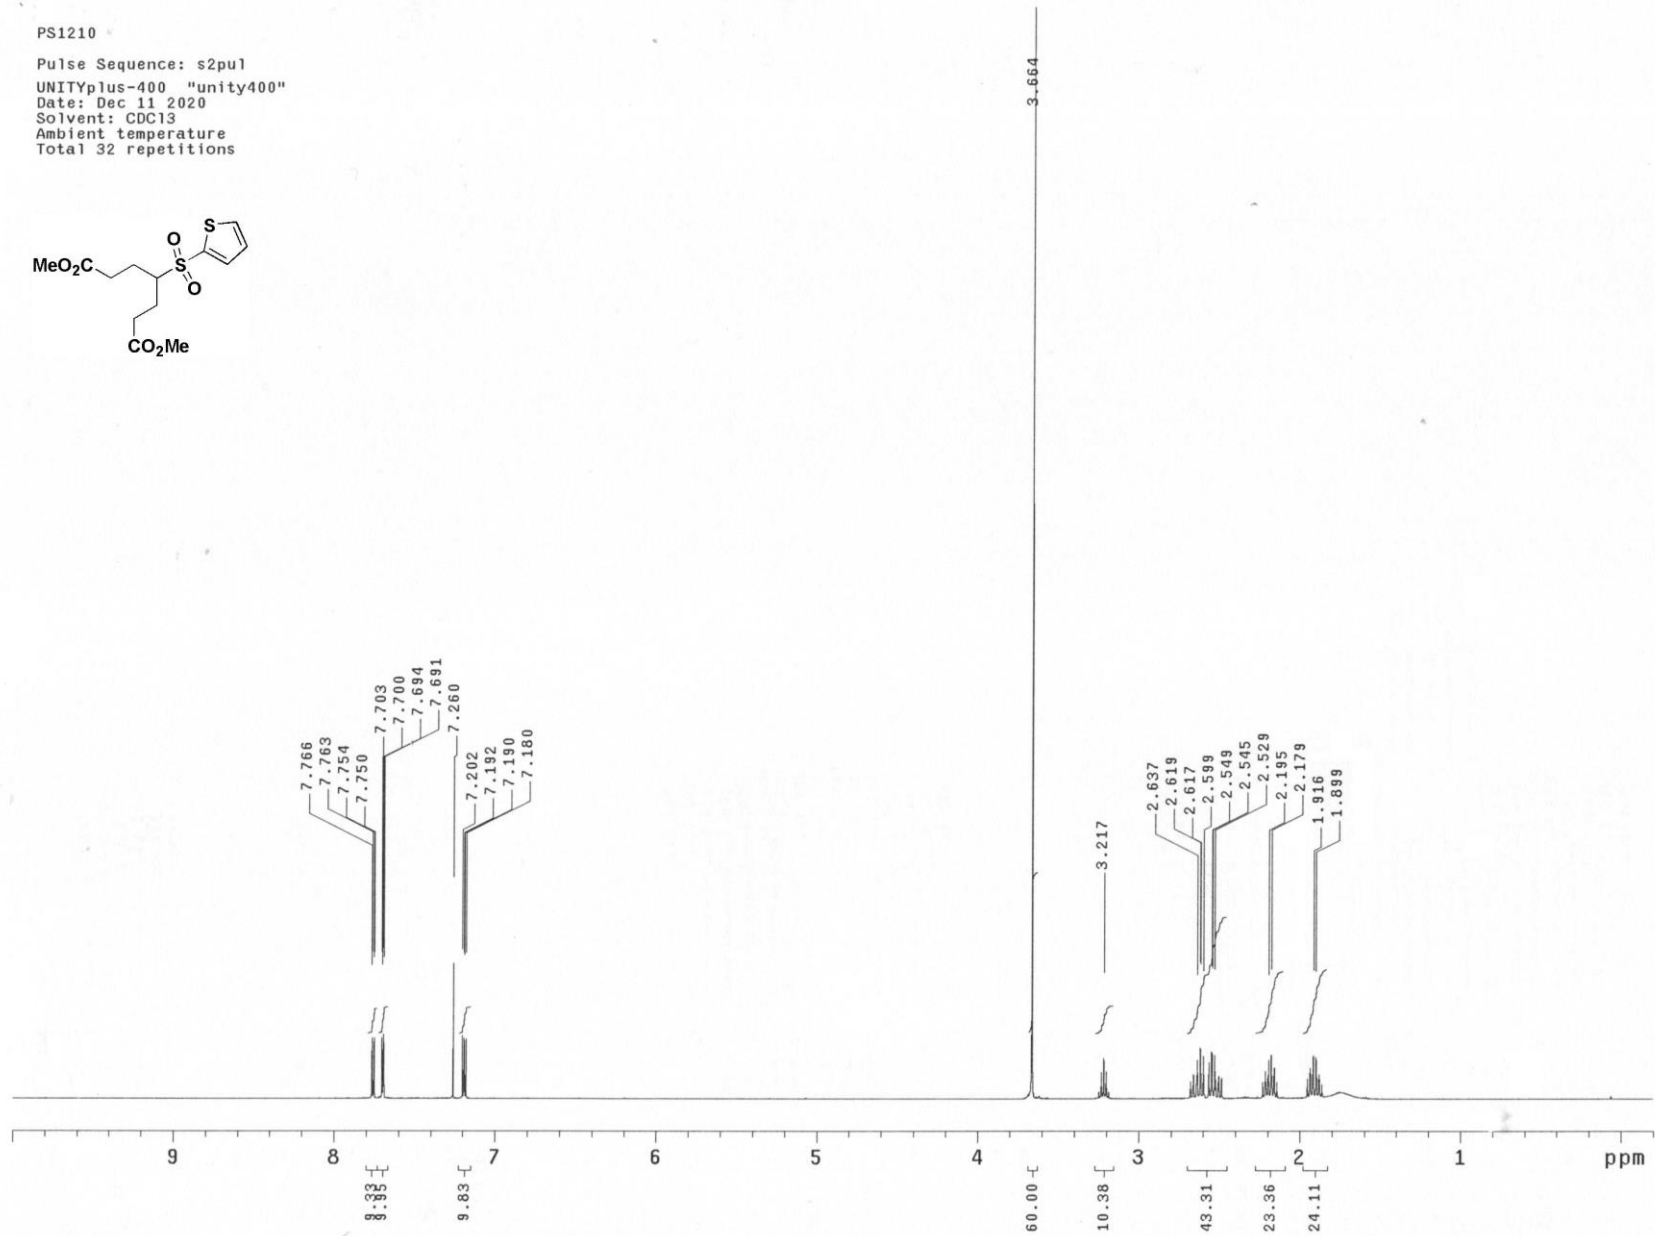



# Compound 6n (<sup>13</sup>C-NMR spectral data)

PS1210

Pulse Sequence: s2pu1

UNITYplus-400 "unity400"

Date: Dec 11 2020

Solvent: CDCl<sub>3</sub>

Ambient temperature

Total 2720 repetitions

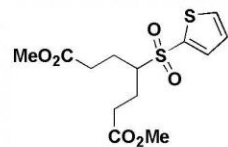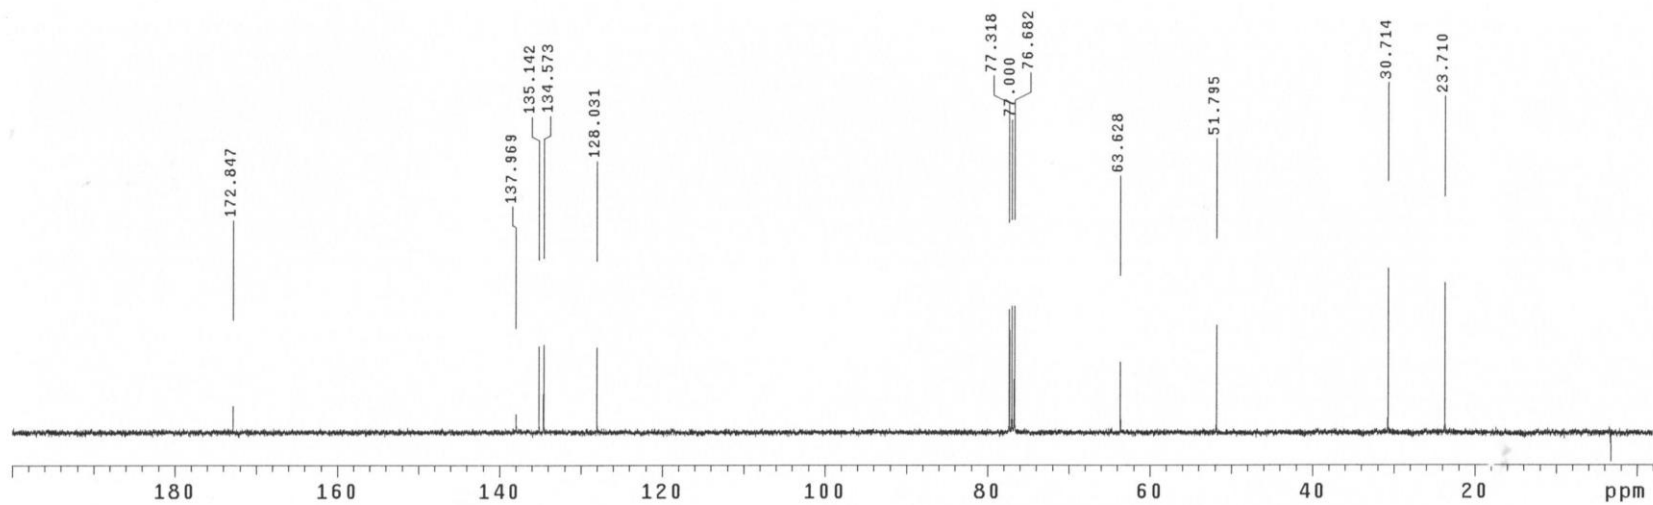

# Compound 7a (<sup>1</sup>H-NMR spectral data)

CRA0113

Pulse Sequence: s2pu1

UNITYplus-400 "unity400"

Date: Jan 15 2021

Solvent: CDCl<sub>3</sub>

Ambient temperature

Total 32 repetitions

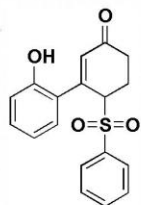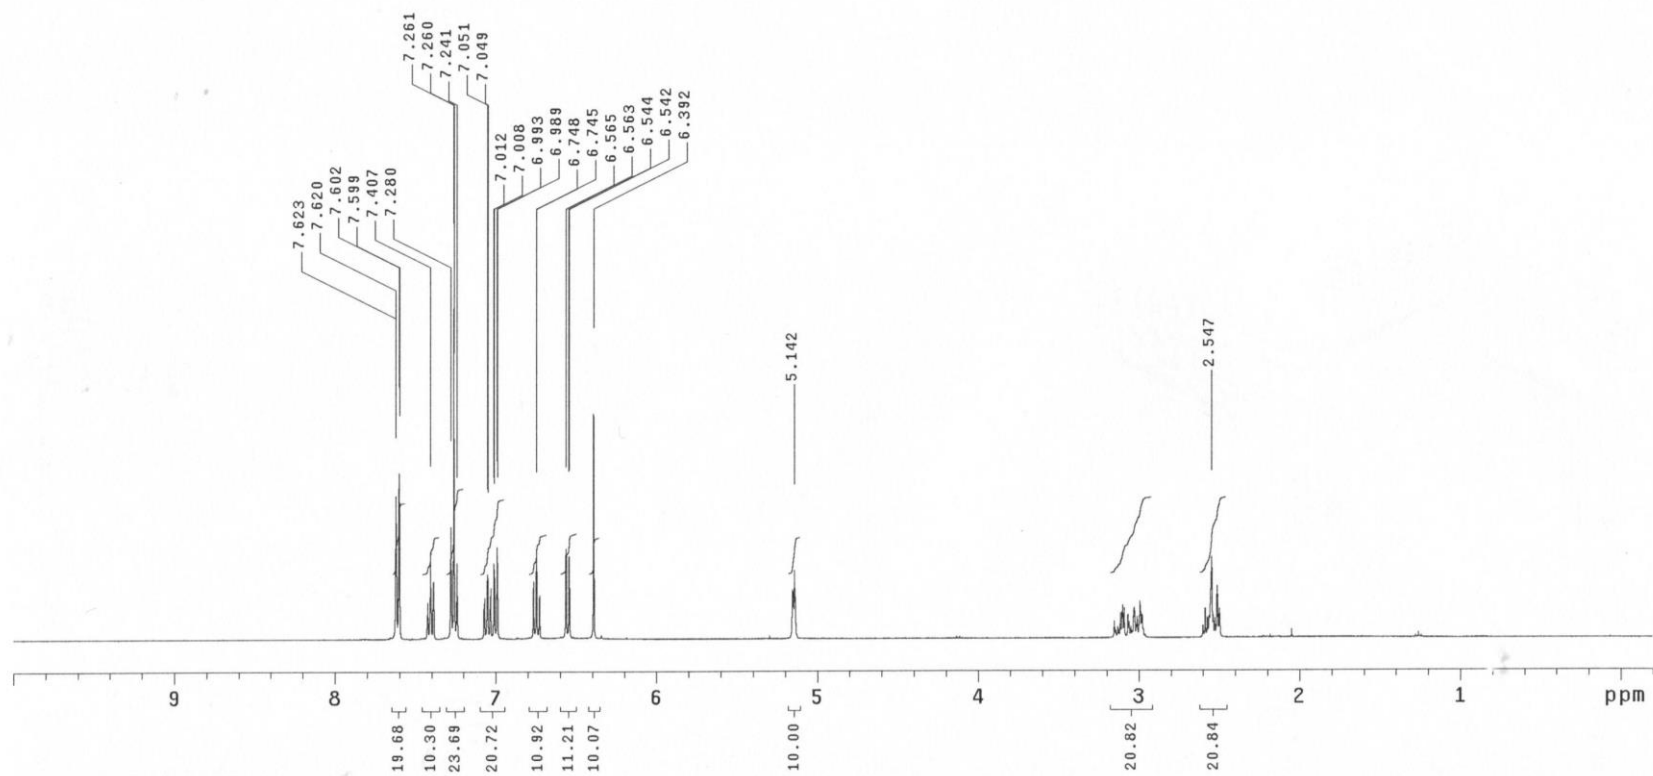

# Compound 7a (<sup>13</sup>C-NMR spectral data)

CRA0113

Pulse Sequence: s2pu1

UNITYplus-400 "unity400"

Date: Jan 15 2021

Solvent: CDCl<sub>3</sub>

Ambient temperature

Total 2128 repetitions

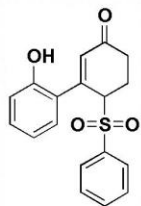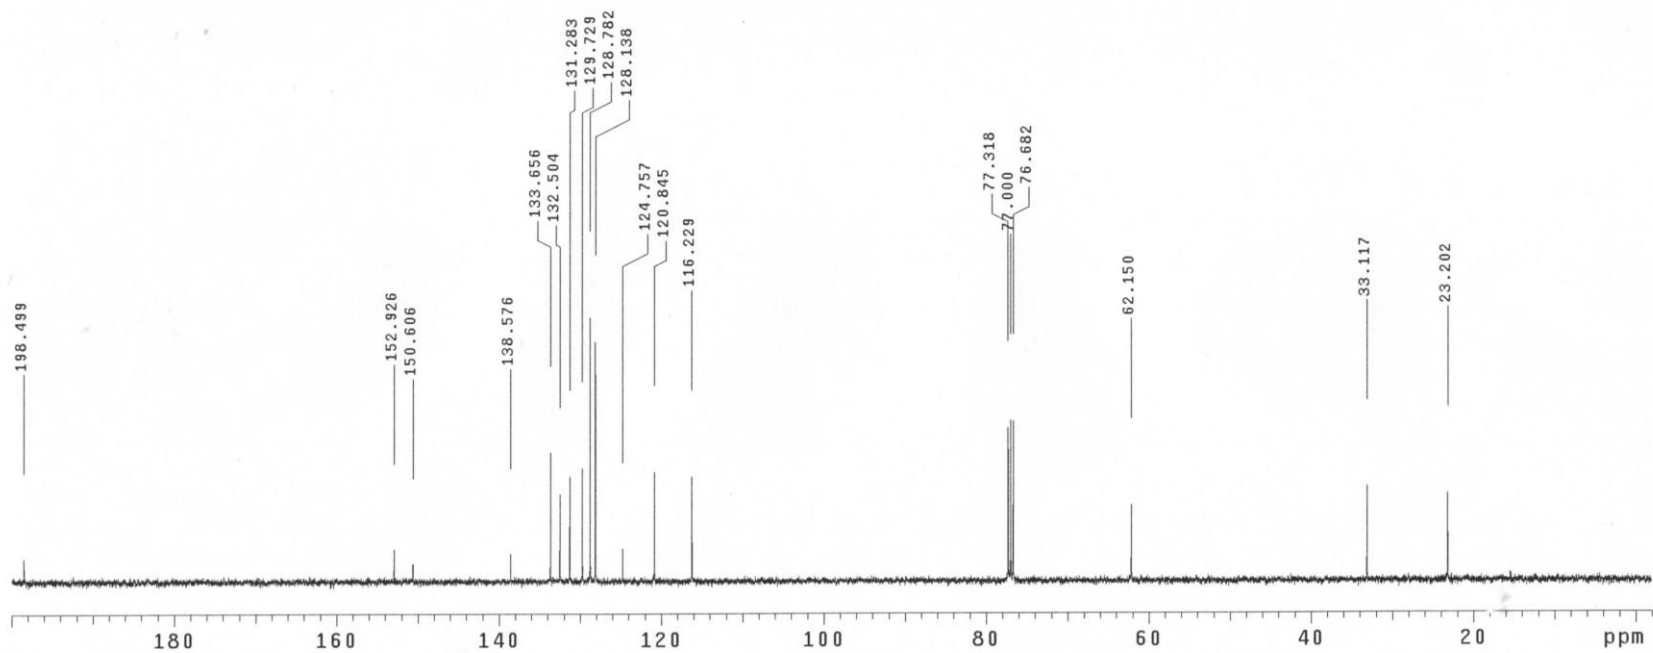

# Compound 7b (<sup>1</sup>H-NMR spectral data)

PSMVK103

Pulse Sequence: s2pu1

UNITYplus-400 "unity400"

Date: Dec 21 2020

Solvent: CDCl<sub>3</sub>

Ambient temperature

Total 32 repetitions

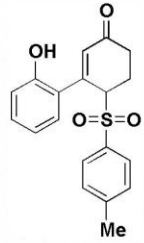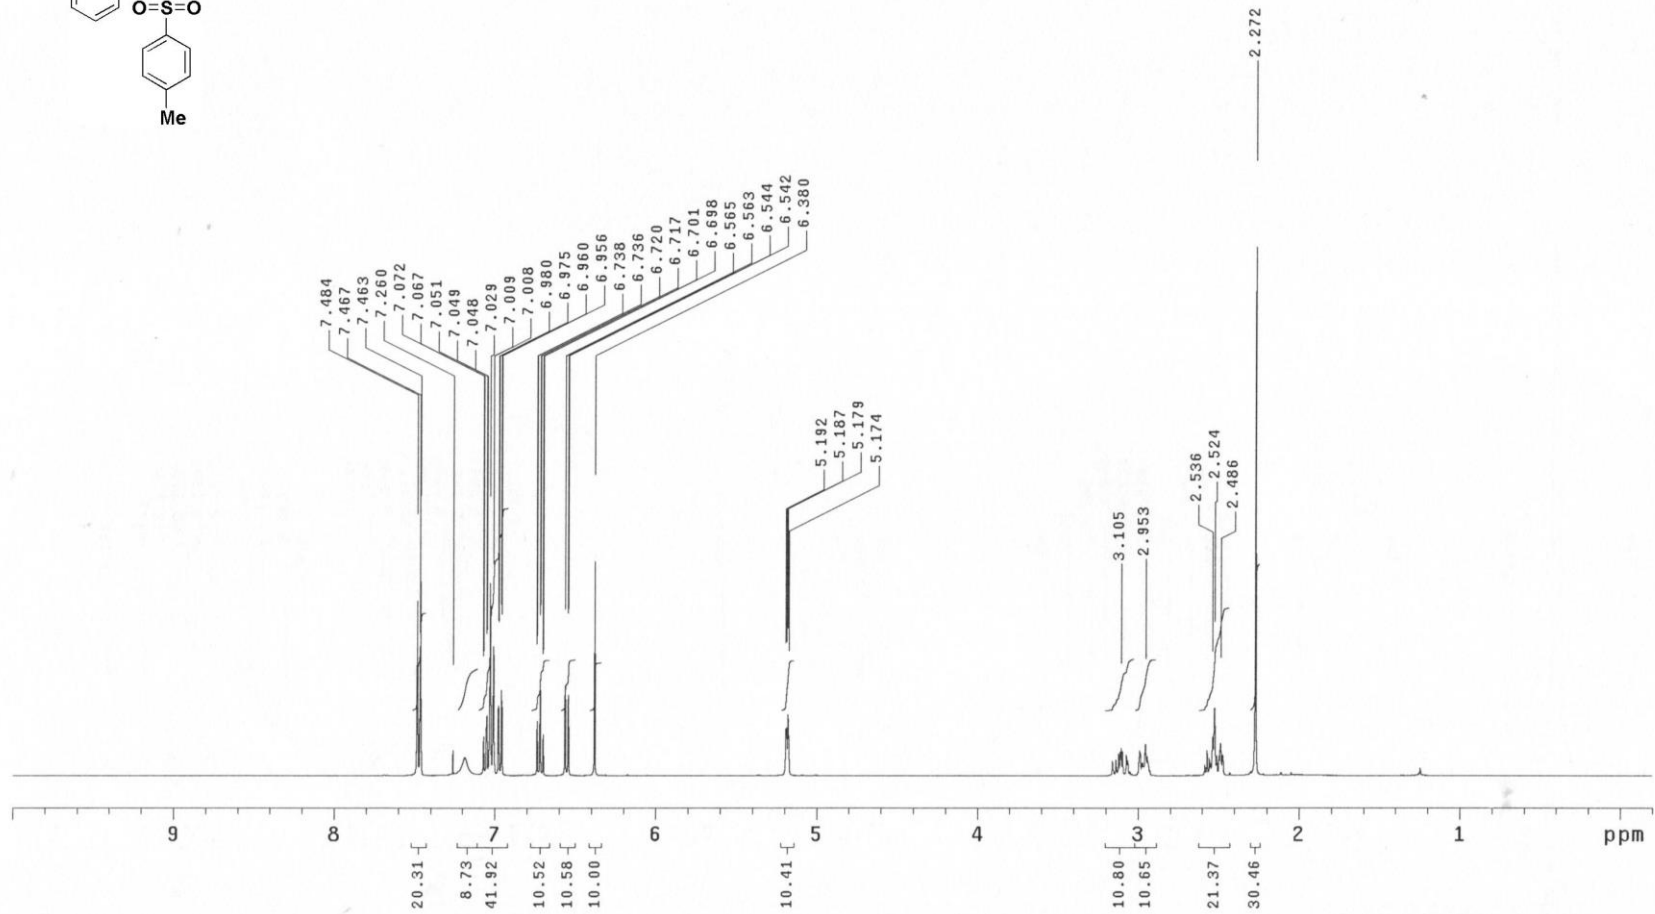

# Compound 7b (<sup>13</sup>C-NMR spectral data)

PSMVK103

Pulse Sequence: s2pu1

UNITYplus-400 "unity400"

Date: Dec 21 2020

Solvent: CDC13

Ambient temperature

Total 2208 repetitions

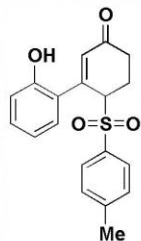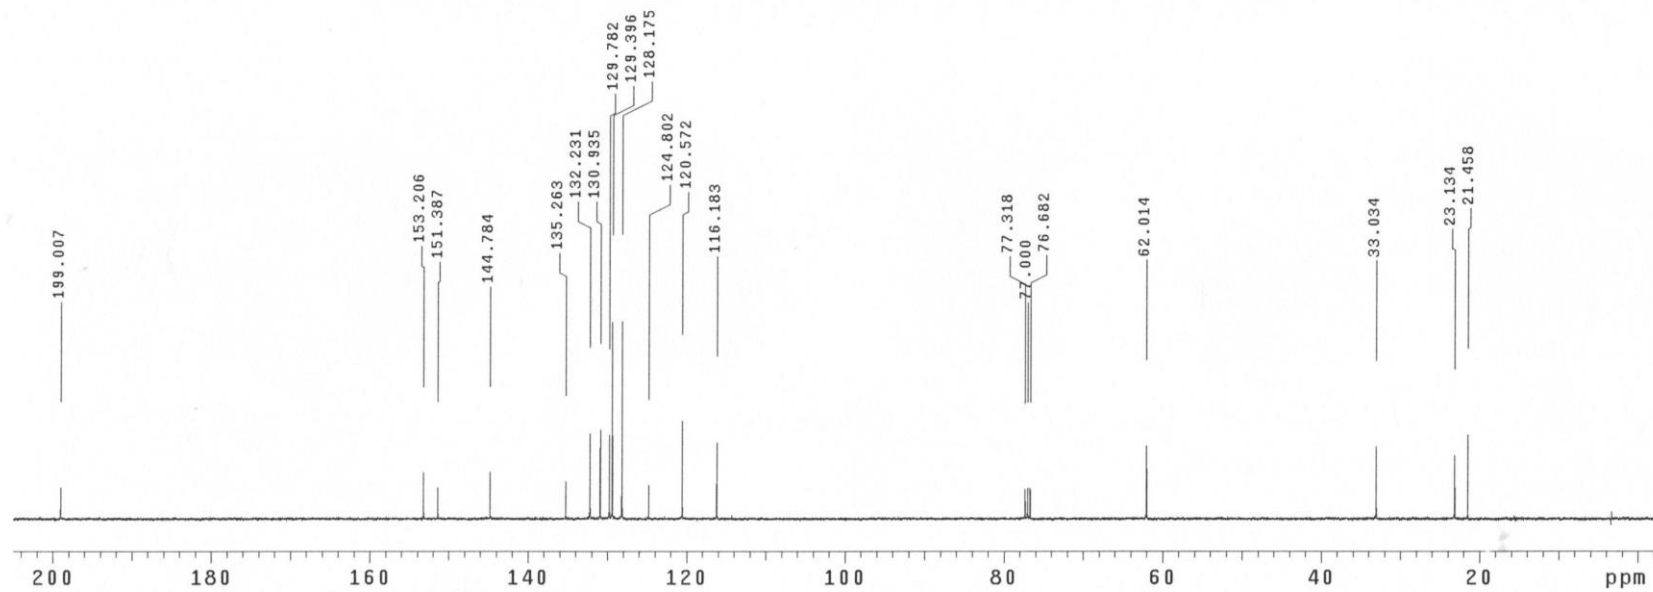

# Compound 5a (<sup>1</sup>H-NMR spectral data)

PS1106

Pulse Sequence: s2pu1

UNITYplus-400 "unity400"

Date: Nov 5 2020

Solvent: CDCl<sub>3</sub>

Ambient temperature

Total 32 repetitions

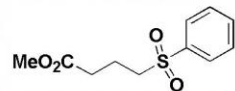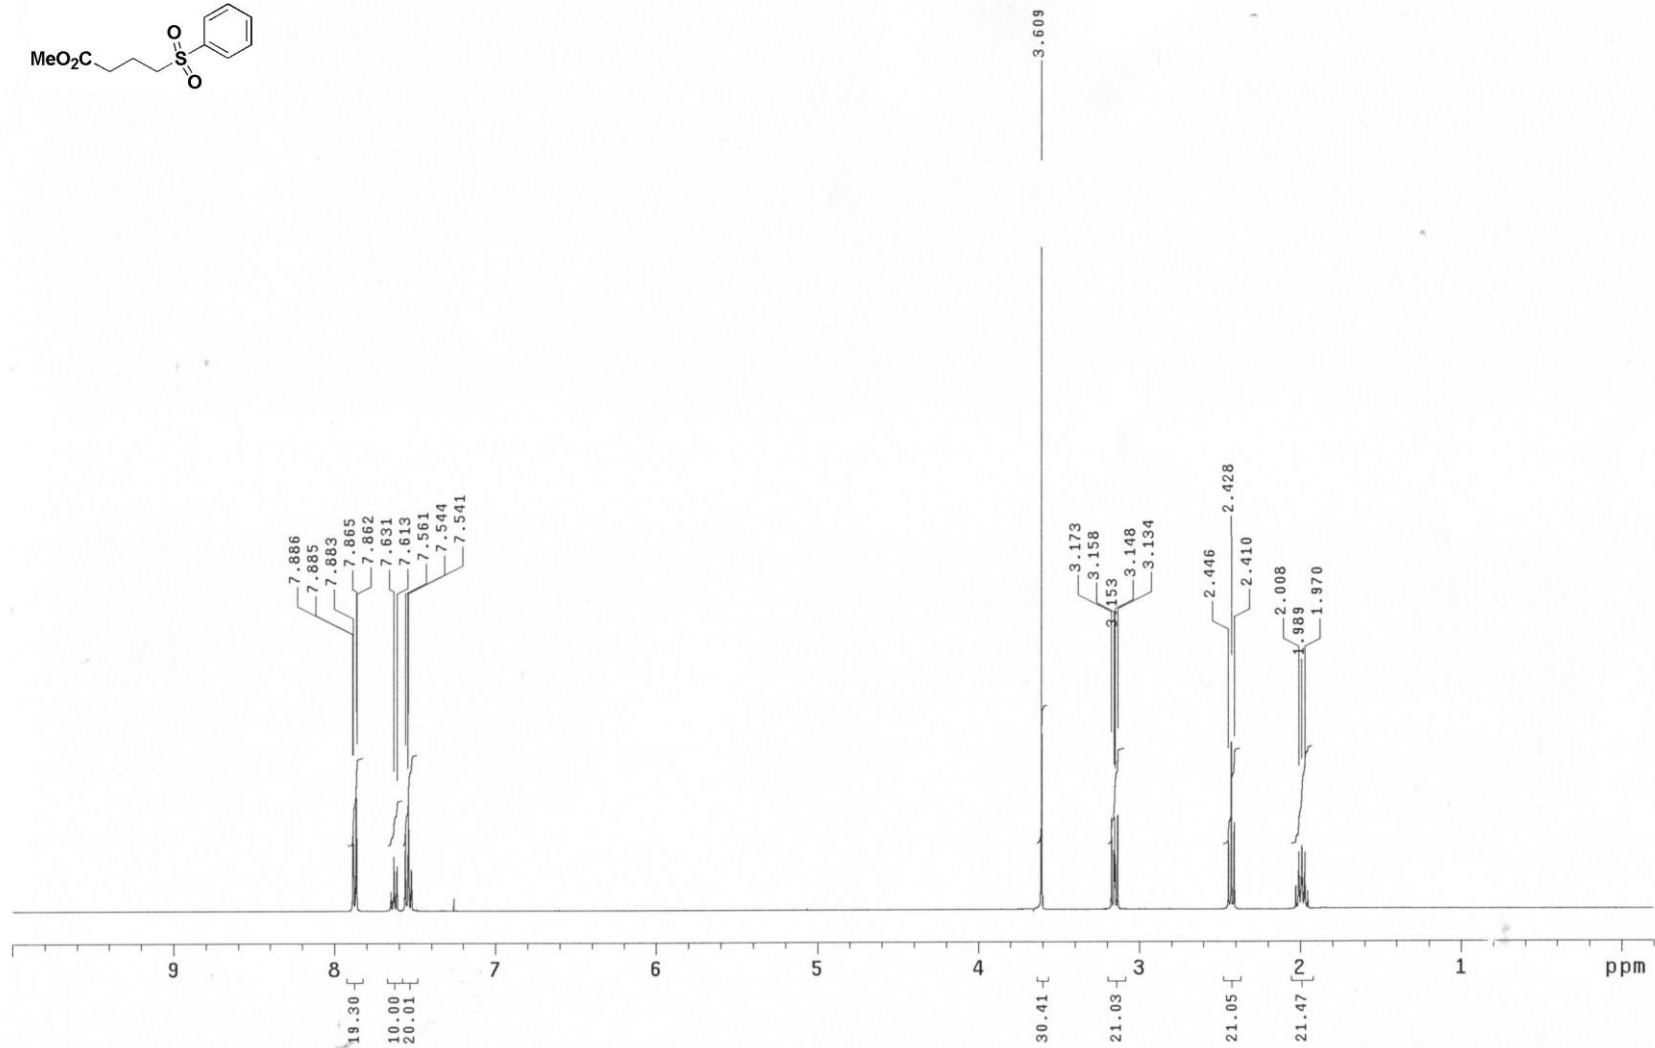

# Compound 5a (<sup>13</sup>C-NMR spectral data)

PS1106

Pulse Sequence: s2pu1

UNITYplus-400 "unity400"

Date: Nov 5 2020

Solvent: CDCl<sub>3</sub>

Ambient temperature

Total 944 repetitions

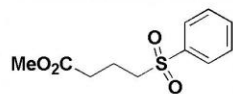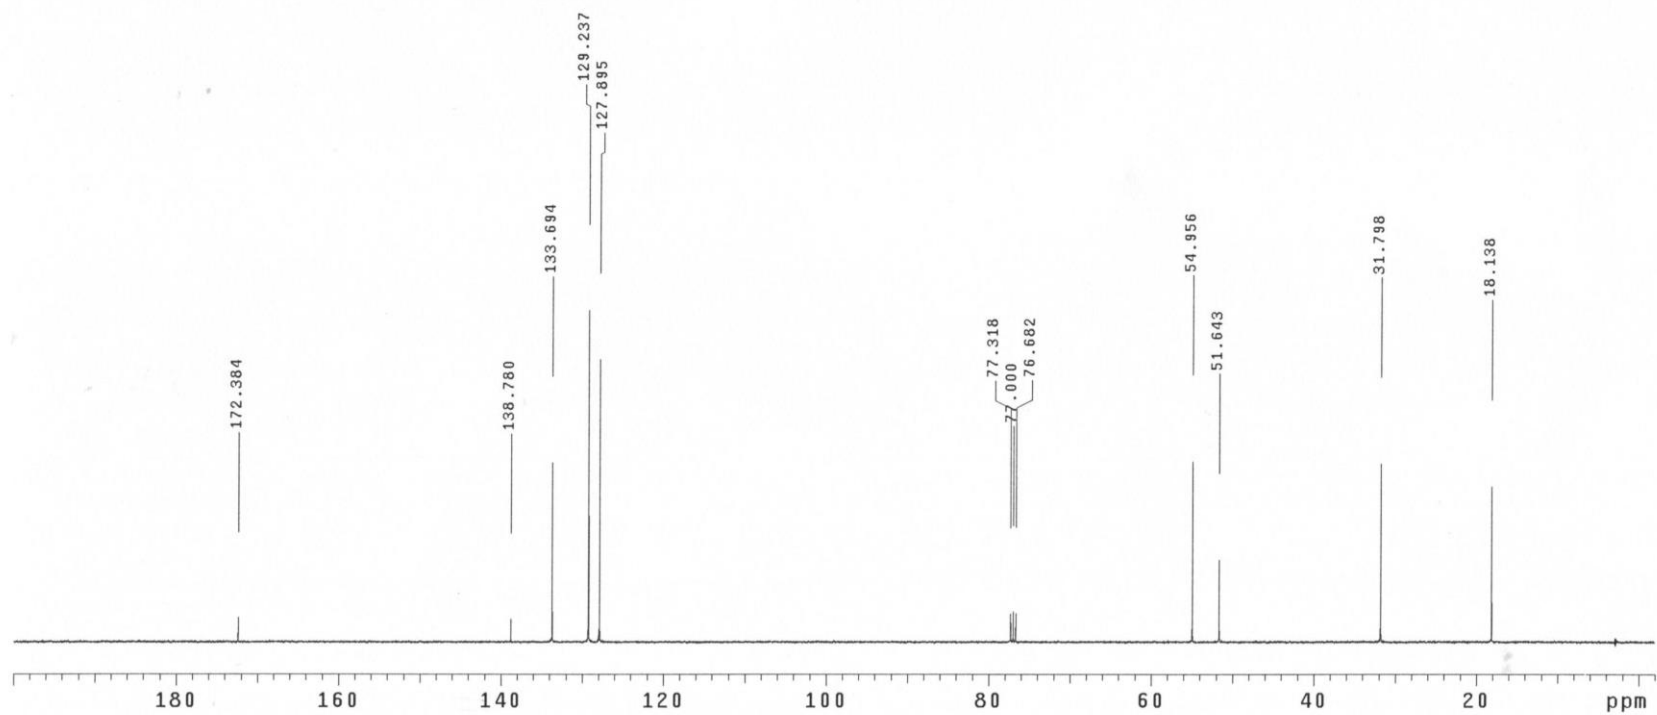

# Compound 5b (<sup>1</sup>H-NMR spectral data)

PS1104

Pulse Sequence: s2pu1

UNITYplus-400 "unity400"

Date: Nov 4 2020

Solvent: CDCl<sub>3</sub>

Ambient temperature

Total 32 repetitions

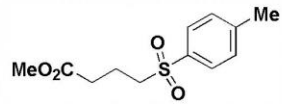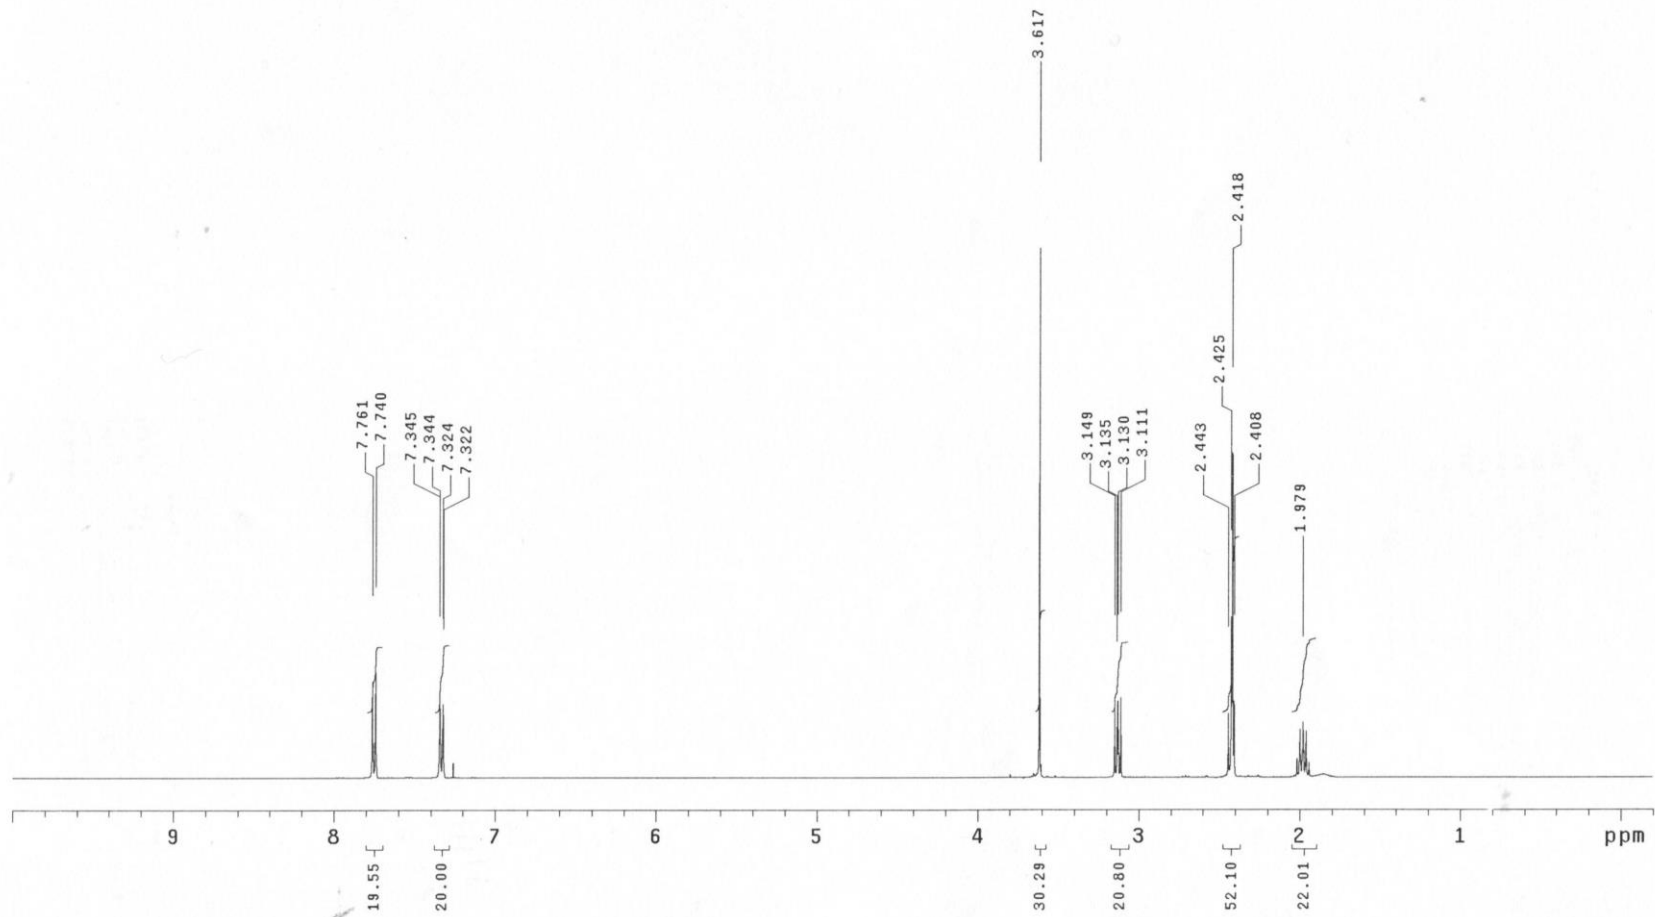



# Compound 5b (<sup>13</sup>C-NMR spectral data)

PS1104

Pulse Sequence: s2pu1

UNITYplus-400 "unity400"

Date: Nov 4 2020

Solvent: CDCl<sub>3</sub>

Ambient temperature

Total 640 repetitions

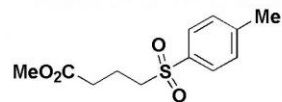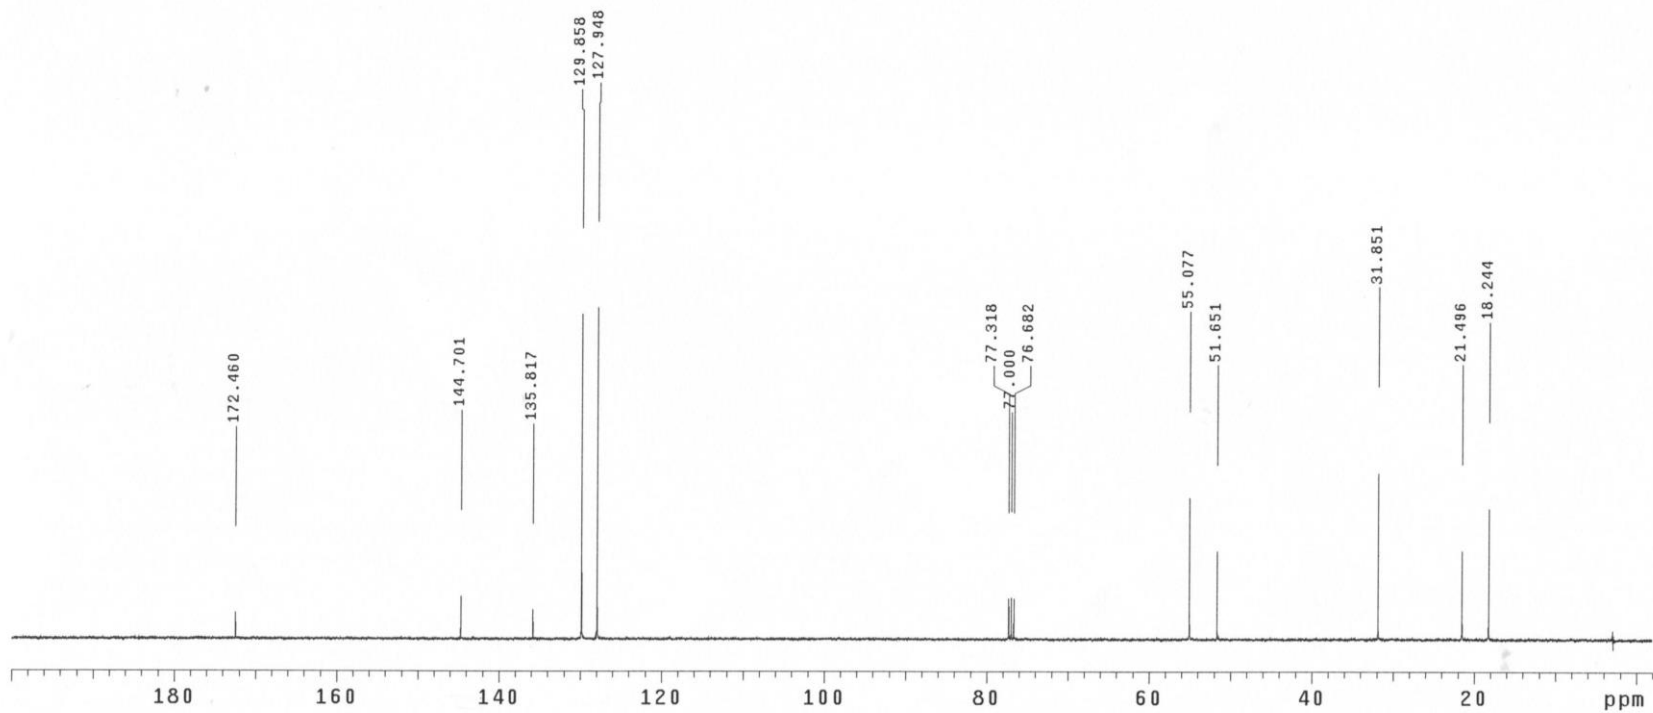

# Compound 5c (<sup>1</sup>H-NMR spectral data)

PS1113-1

Pulse Sequence: s2pu1

UNITYplus-400 "unity400"

Date: Nov 13 2020

Solvent: CDCl<sub>3</sub>

Ambient temperature

Total 32 repetitions

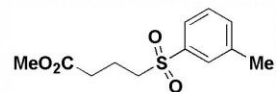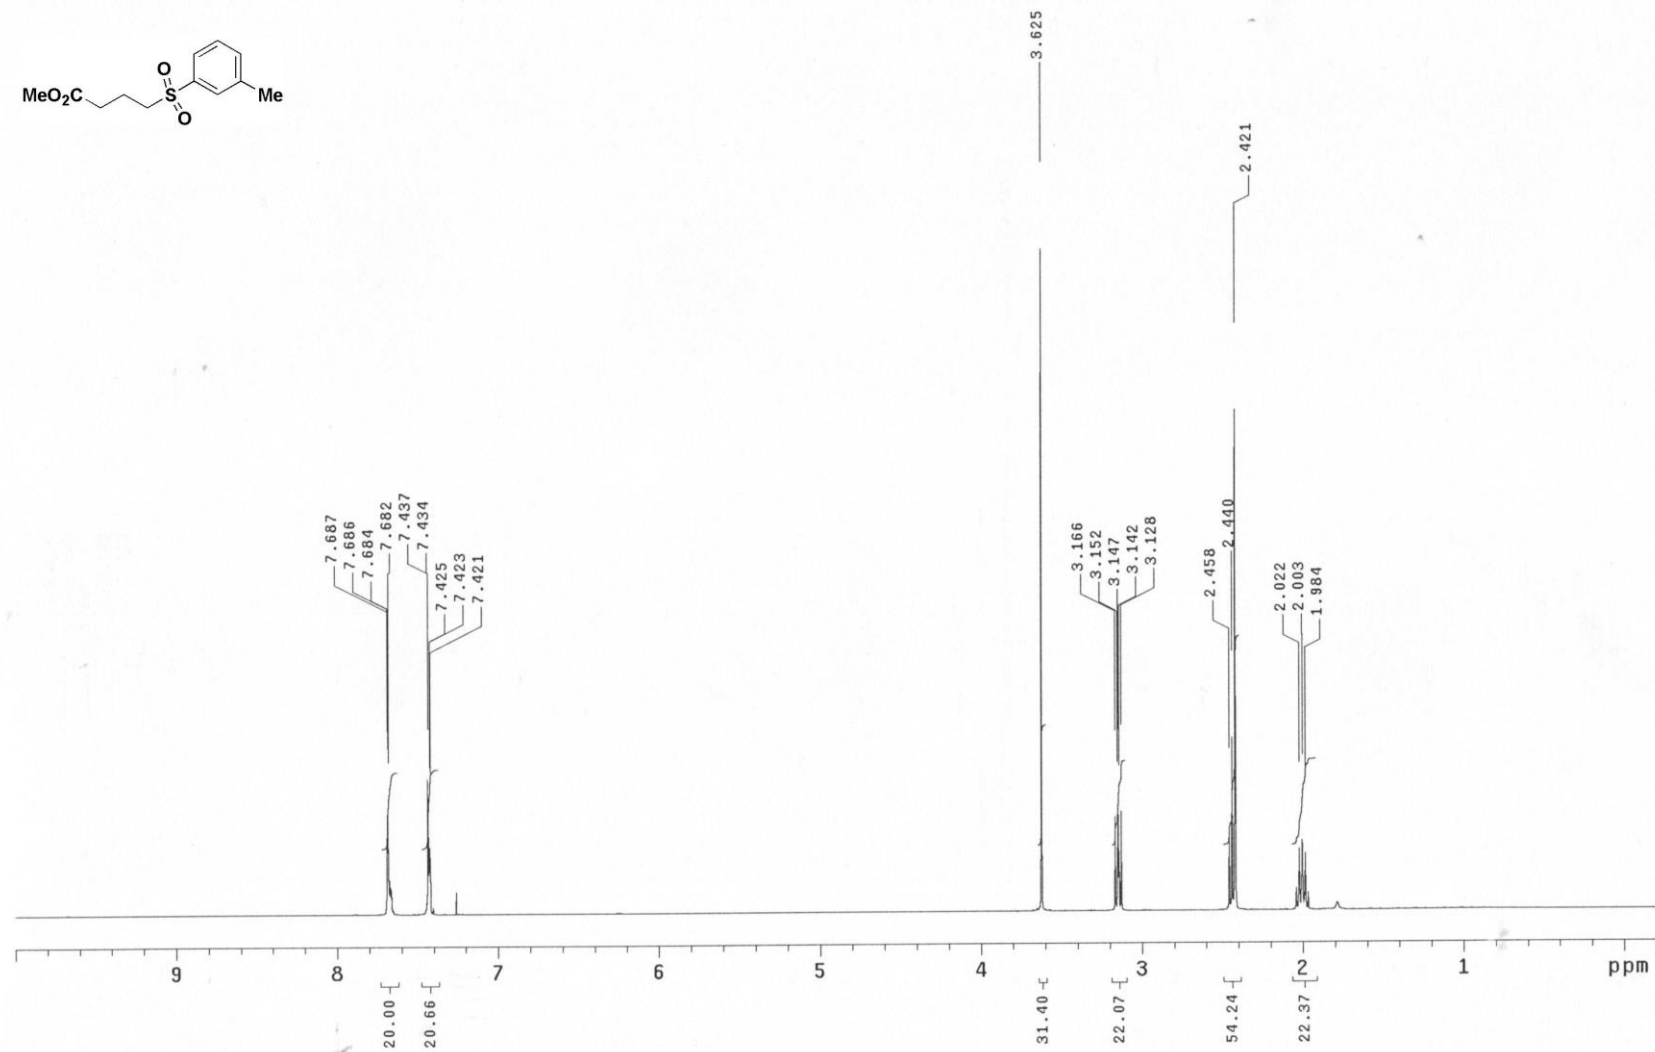

# Compound 5c (<sup>13</sup>C-NMR spectral data)

PS1113-1

Pulse Sequence: s2pu1

UNITYplus-400 "unity400"

Date: Nov 13 2020

Solvent: CDCl<sub>3</sub>

Ambient temperature

Total 720 repetitions

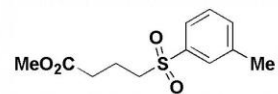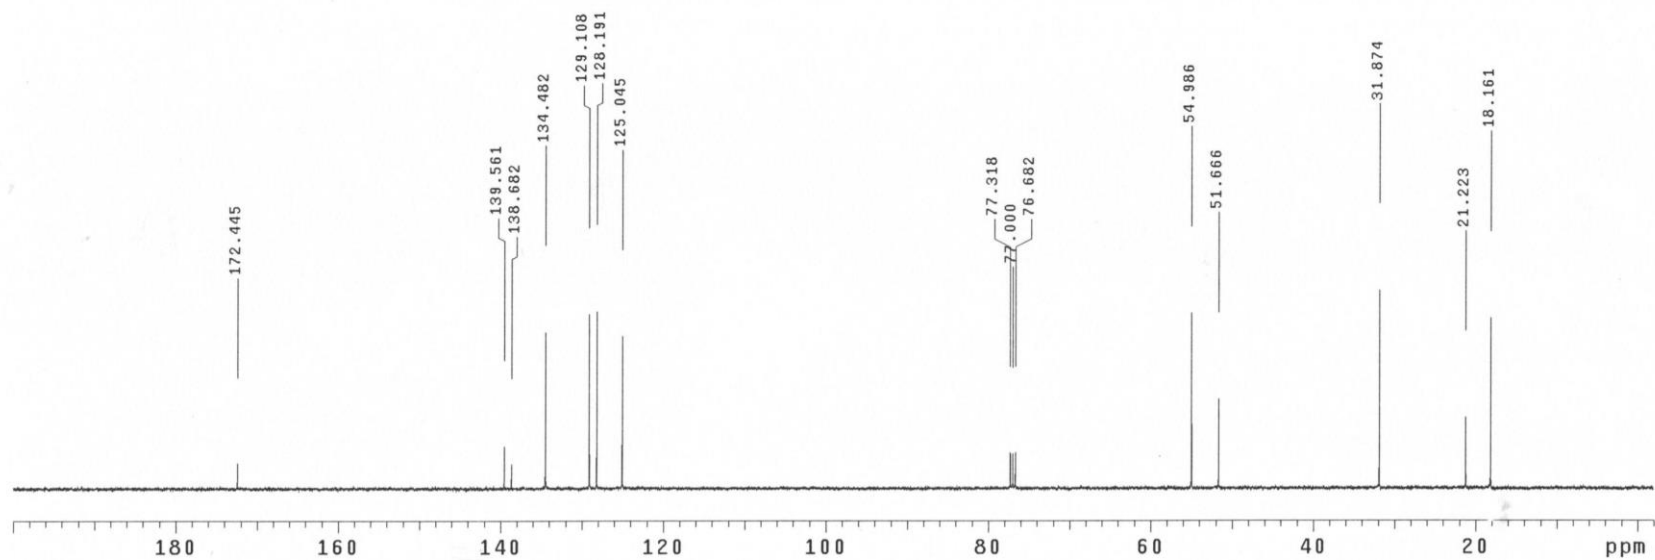

# Compound 5d (<sup>1</sup>H-NMR spectral data)

PS1120-1

Pulse Sequence: s2pu1

UNITYplus-400 "unity400"

Date: Nov 19 2020

Solvent: CDCl<sub>3</sub>

Ambient temperature

Total 32 repetitions

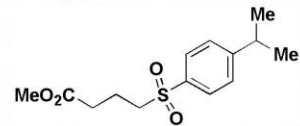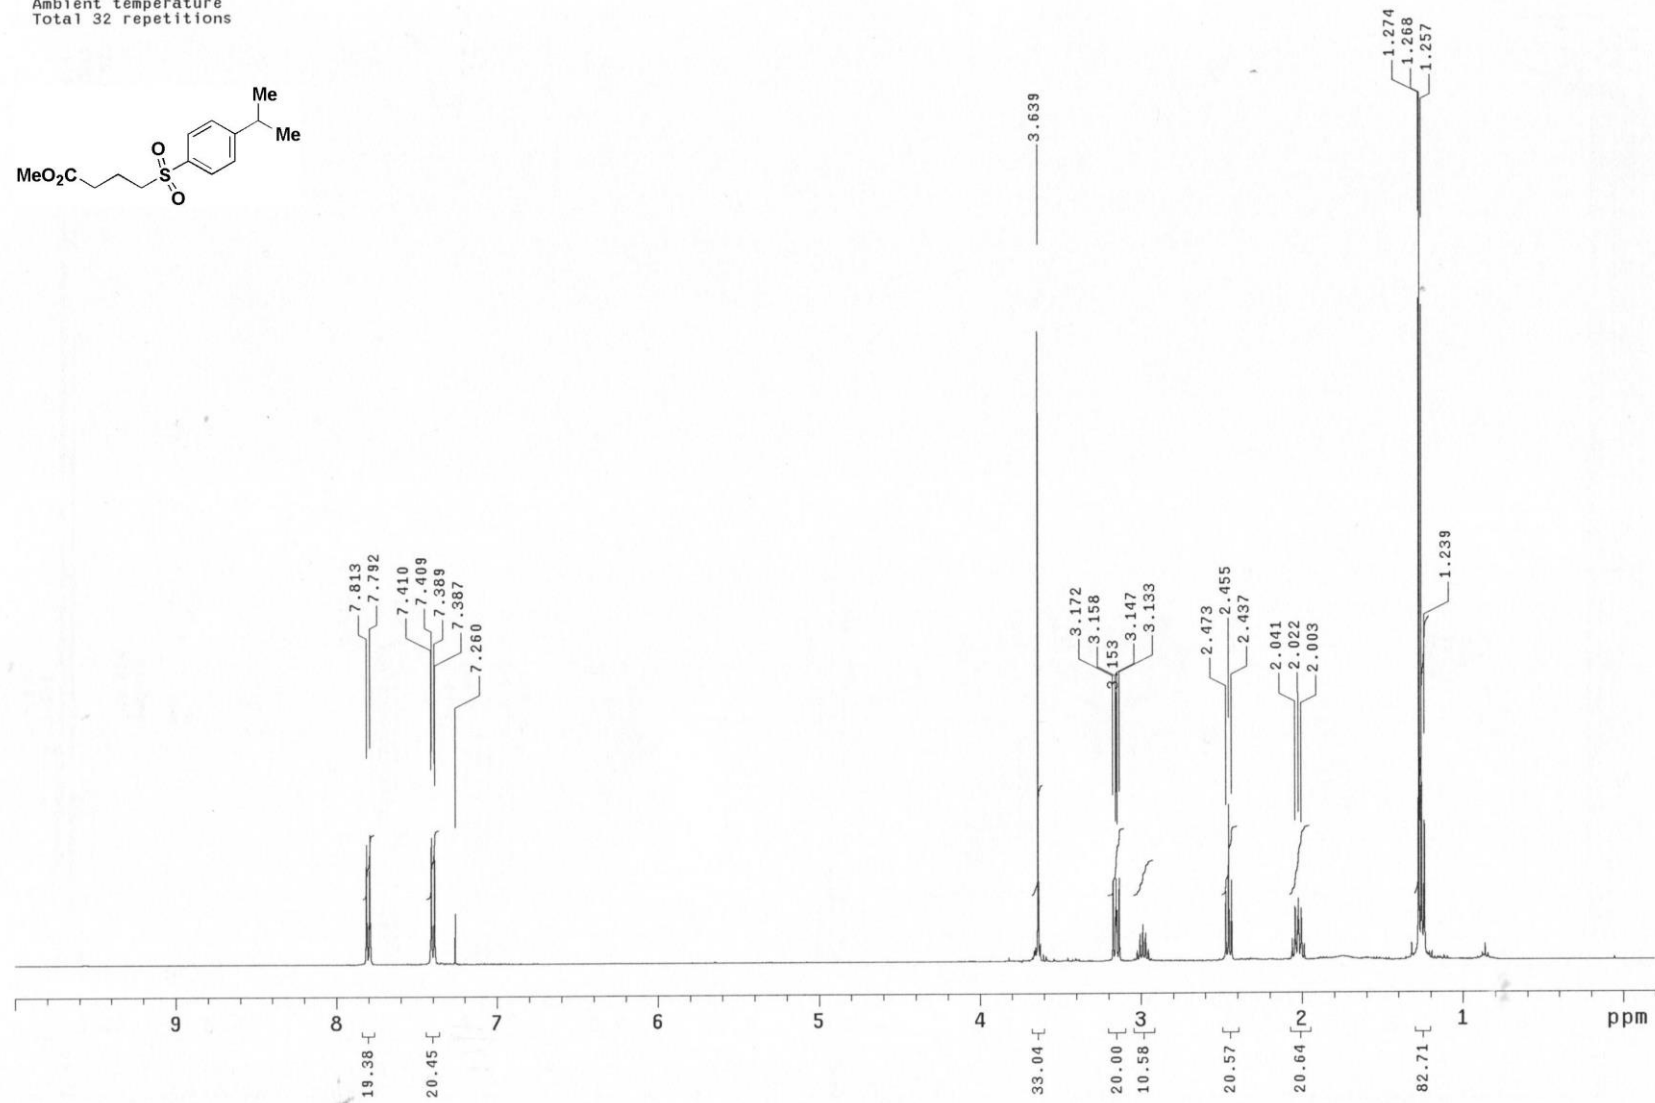

# Compound 5d (<sup>13</sup>C-NMR spectral data)

PS1120-1

Pulse Sequence: s2pu1

UNITYplus-400 "unity400"

Date: Nov 19 2020

Solvent: CDCl<sub>3</sub>

Ambient temperature

Total 1312 repetitions

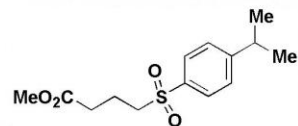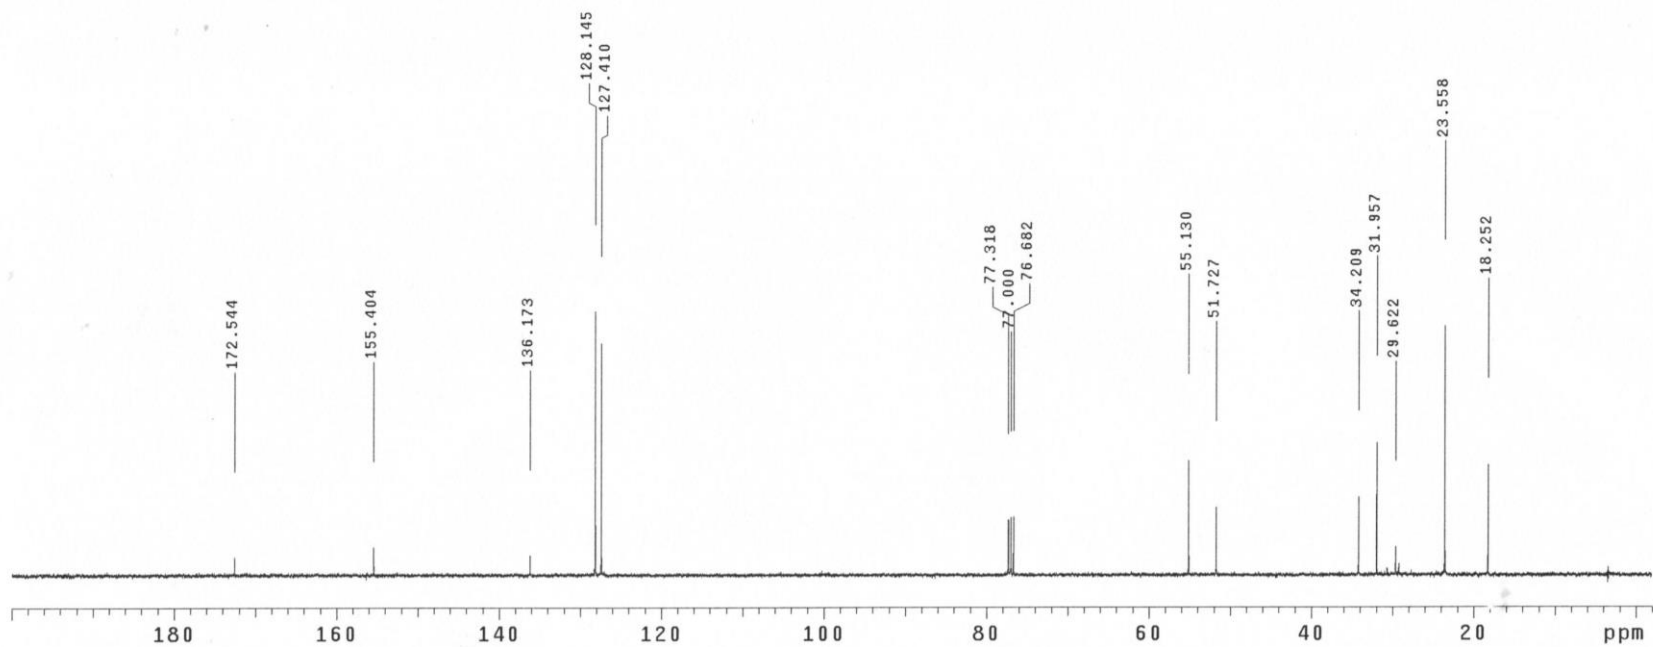

# Compound 5e (<sup>1</sup>H-NMR spectral data)

PS1125-1

Pulse Sequence: s2pu1  
UNITYplus-400 "unity400"  
Date: Nov 26 2020  
Solvent: CDC13  
Ambient temperature  
Total 32 repetitions

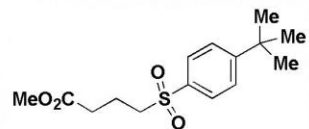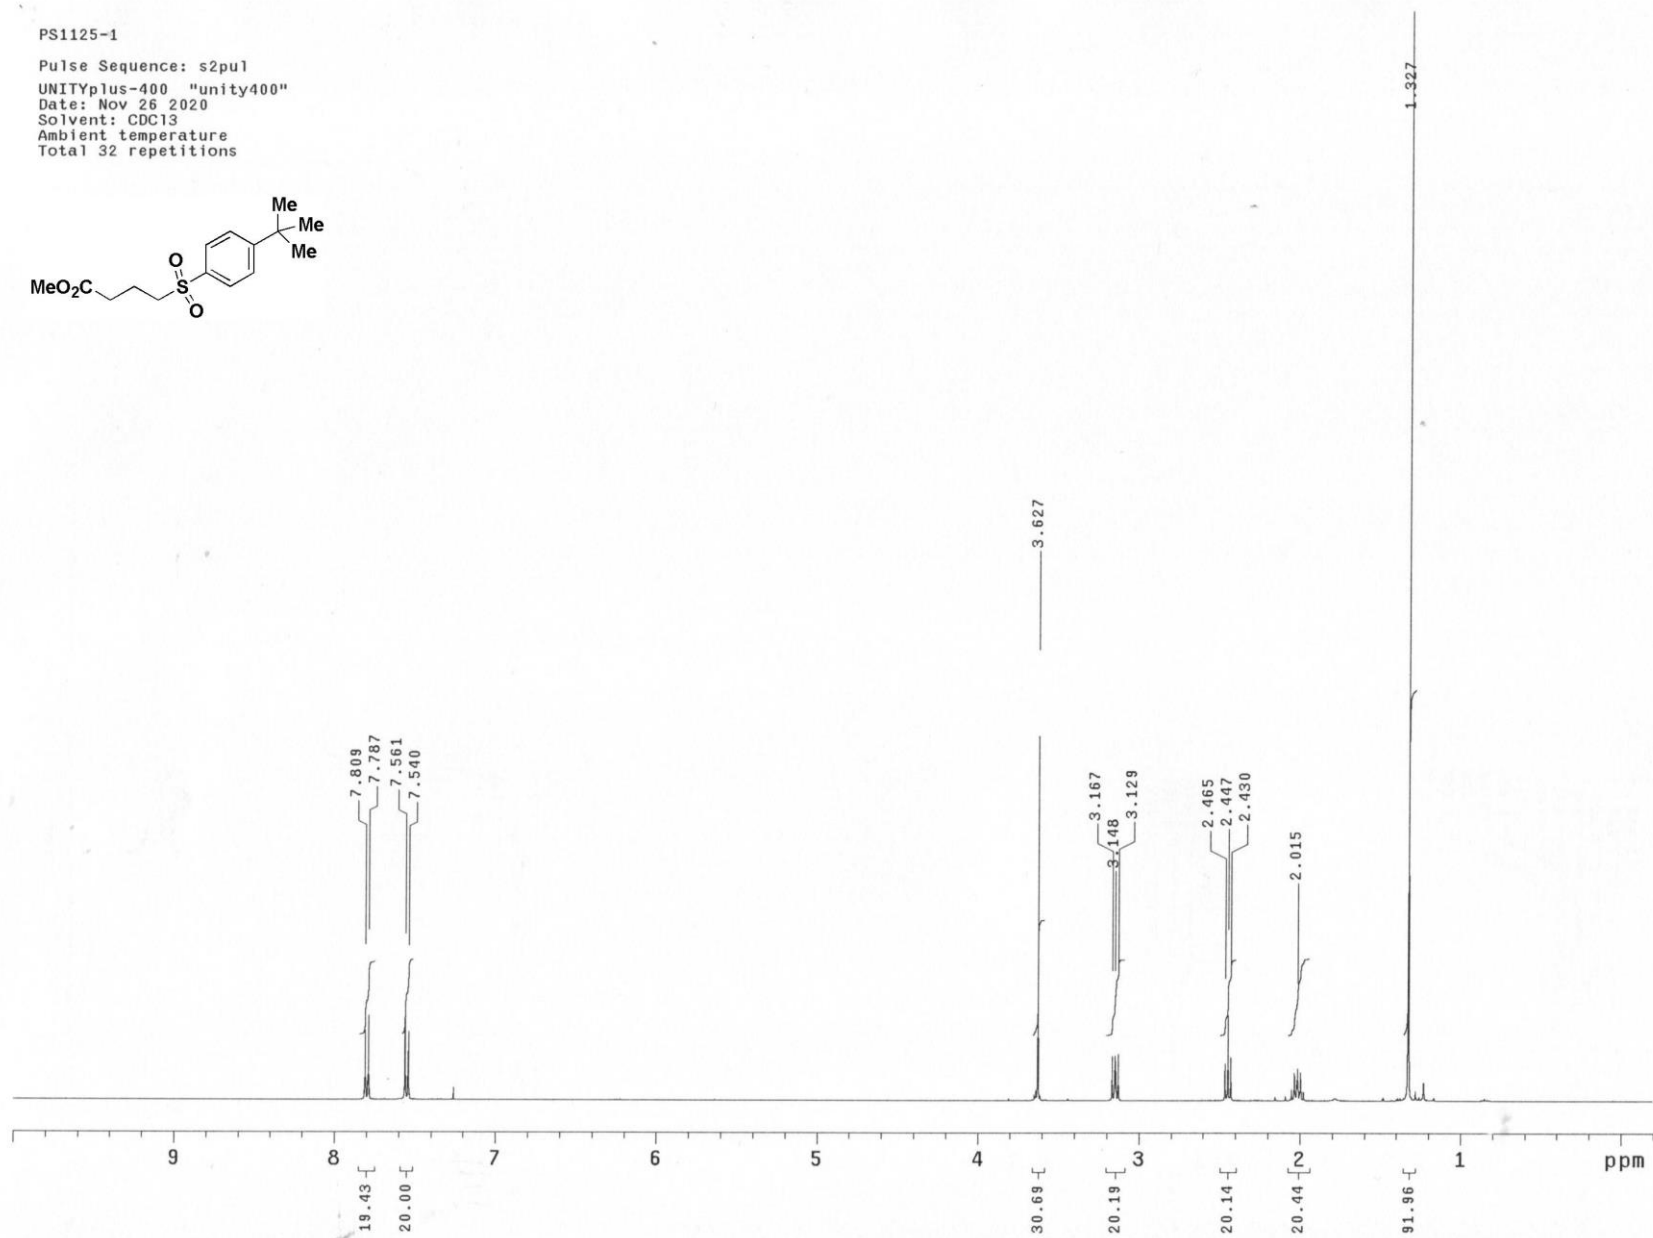

# Compound 5e (<sup>13</sup>C-NMR spectral data)

PS1125-1

Pulse Sequence: s2pu1

UNITYplus-400 "unity400"

Date: Nov 26 2020

Solvent: CDCl<sub>3</sub>

Ambient temperature

Total 1408 repetitions

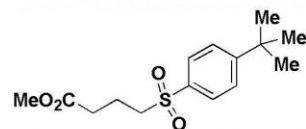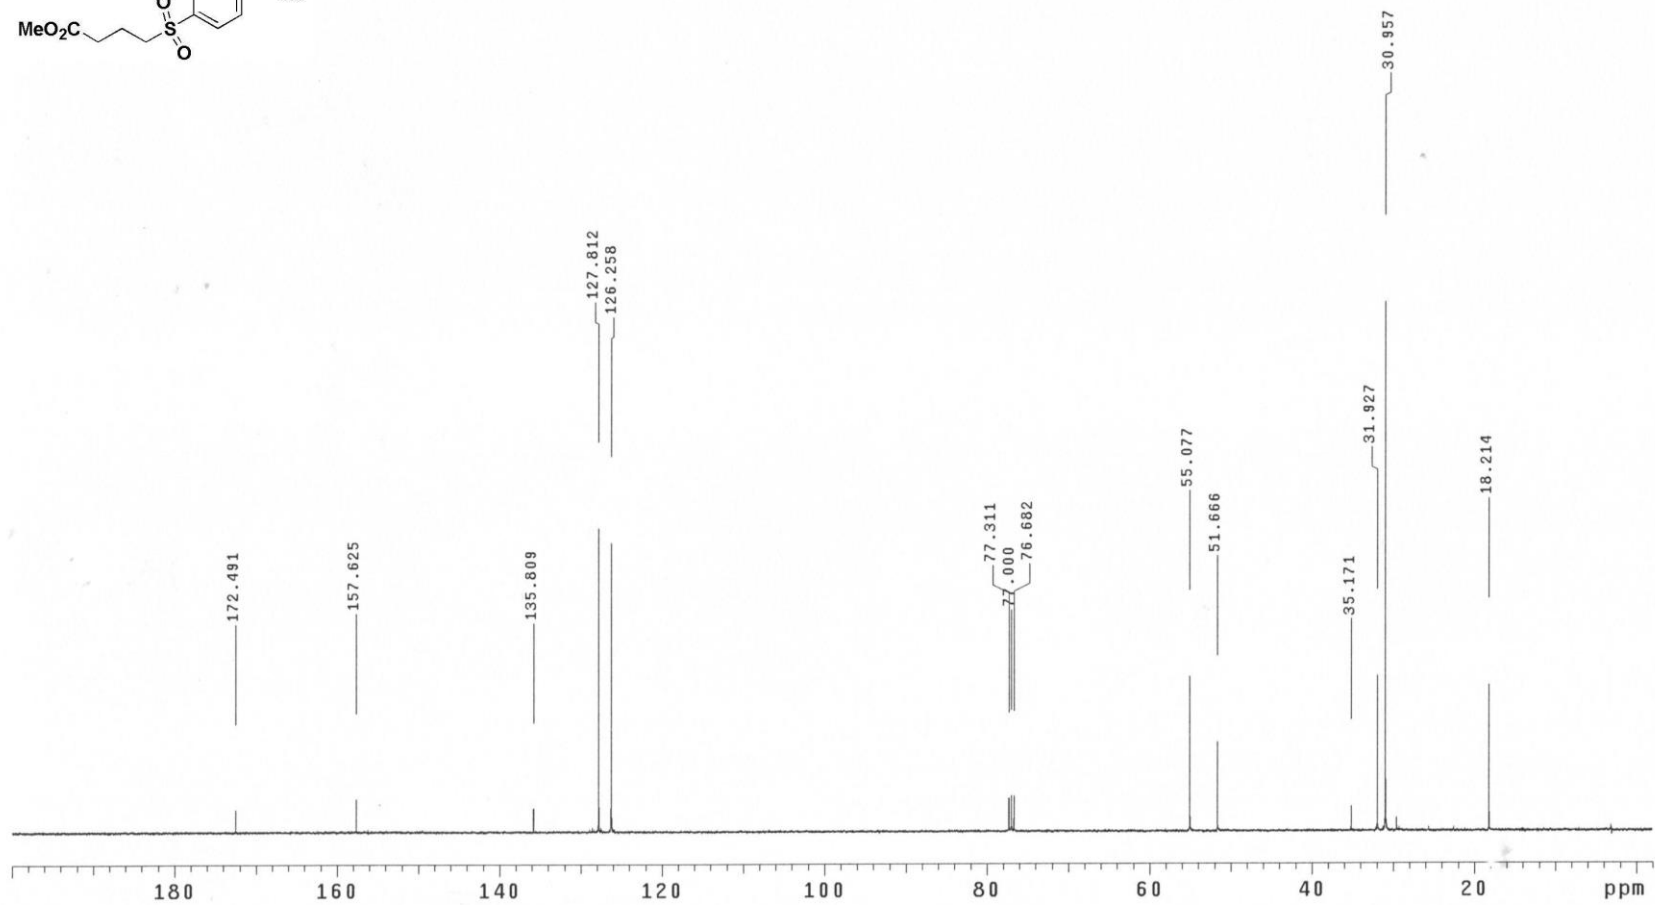

# Compound 5f (<sup>1</sup>H-NMR spectral data)

PS1126-1

Pulse Sequence: s2pu1

UNITYplus-400 "unity400"

Date: Nov 26 2020

Solvent: CDCl<sub>3</sub>

Ambient temperature

Total 32 repetitions

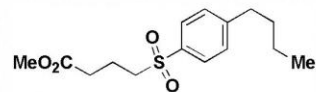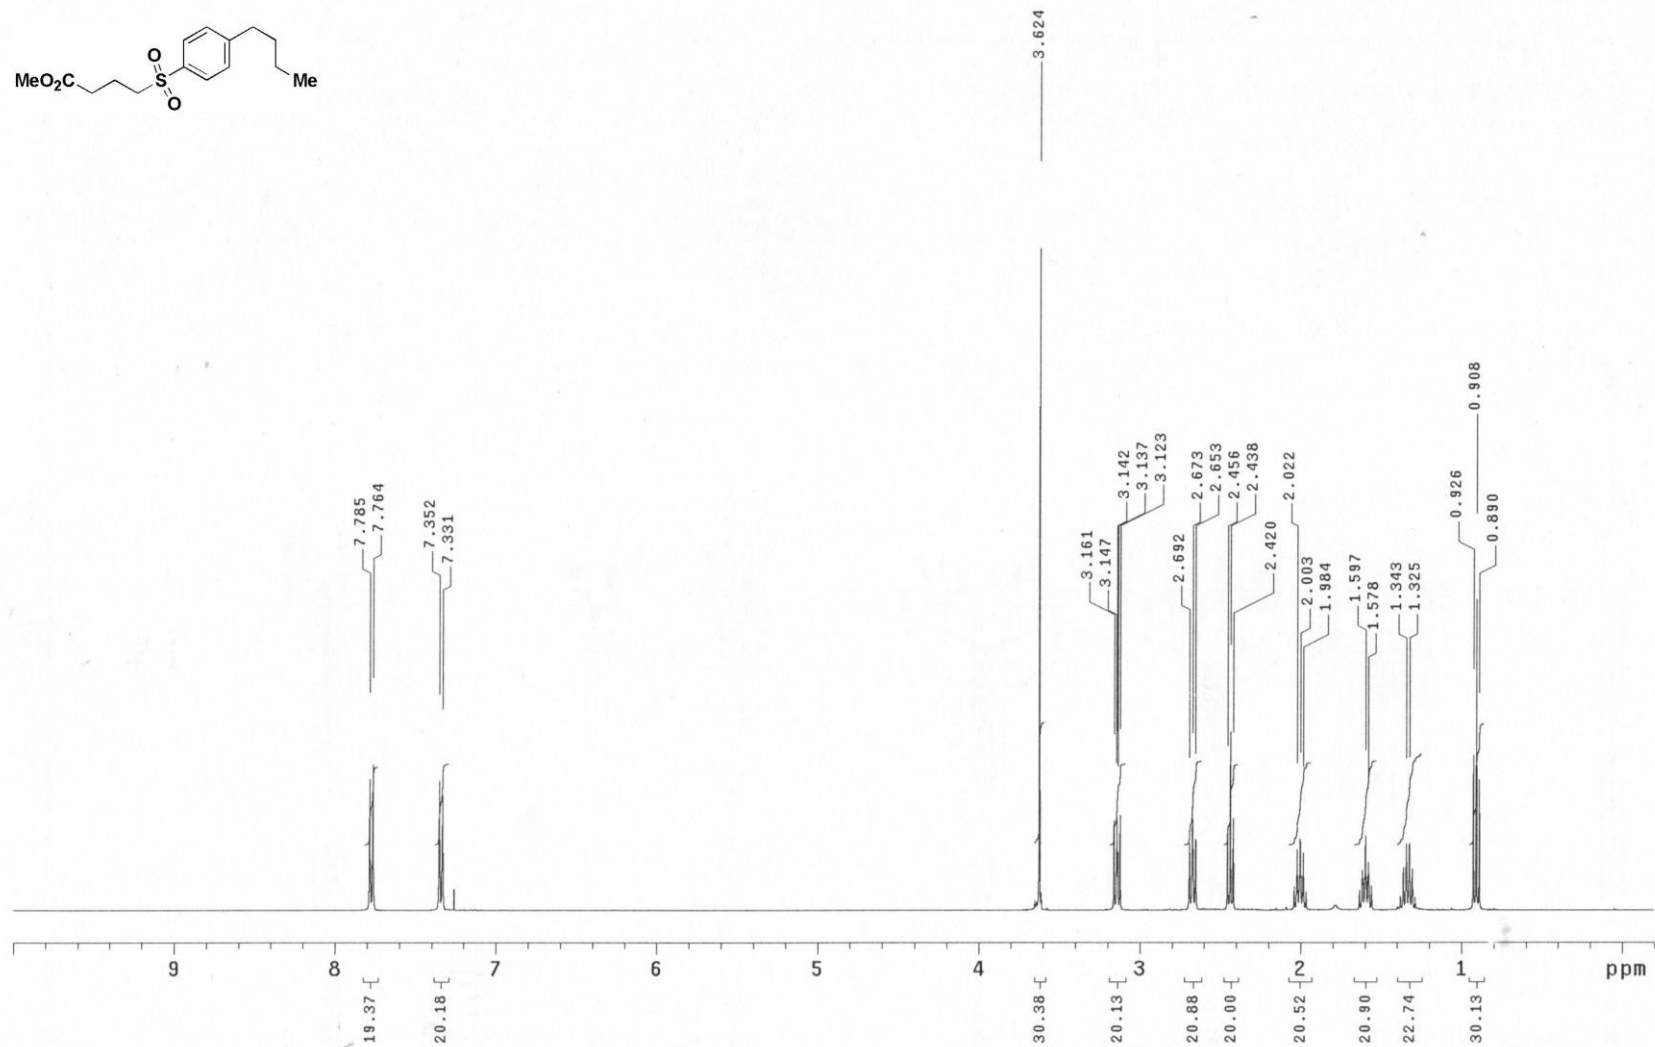



# Compound 5f (<sup>13</sup>C-NMR spectral data)

PS1126-1

Pulse Sequence: s2pu1  
UNITYplus-400 "unity400"  
Date: Nov 26 2020  
Solvent: CDC13  
Ambient temperature  
Total 64000 repetitions

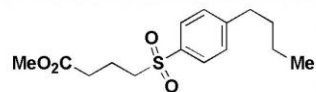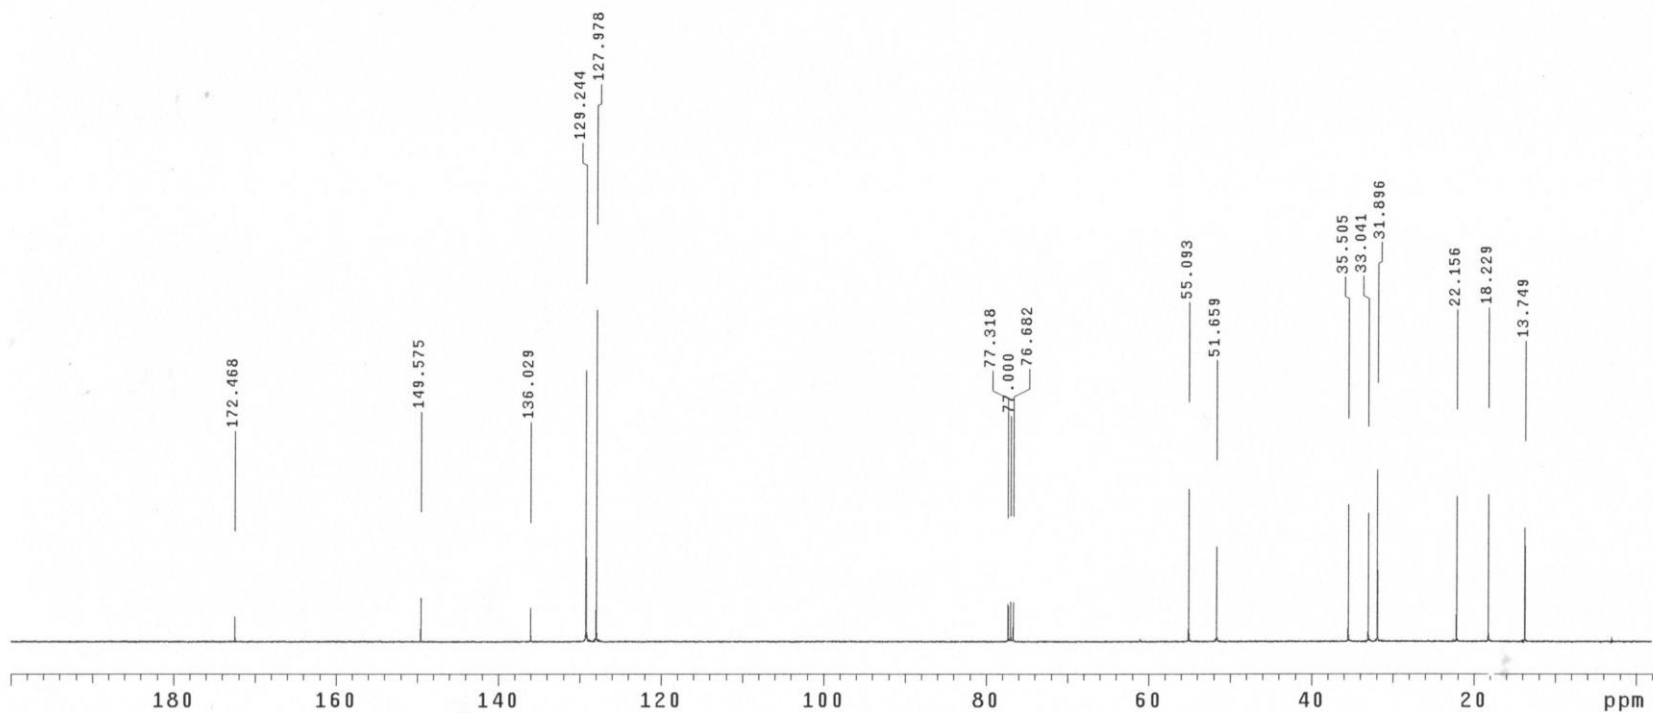

# Compound 5g (<sup>1</sup>H-NMR spectral data)

PS1112-1

Pulse Sequence: s2pu1

UNITYplus-400 "unity400"

Date: Nov 13 2020

Solvent: CDCl<sub>3</sub>

Ambient temperature

Total 32 repetitions

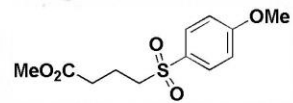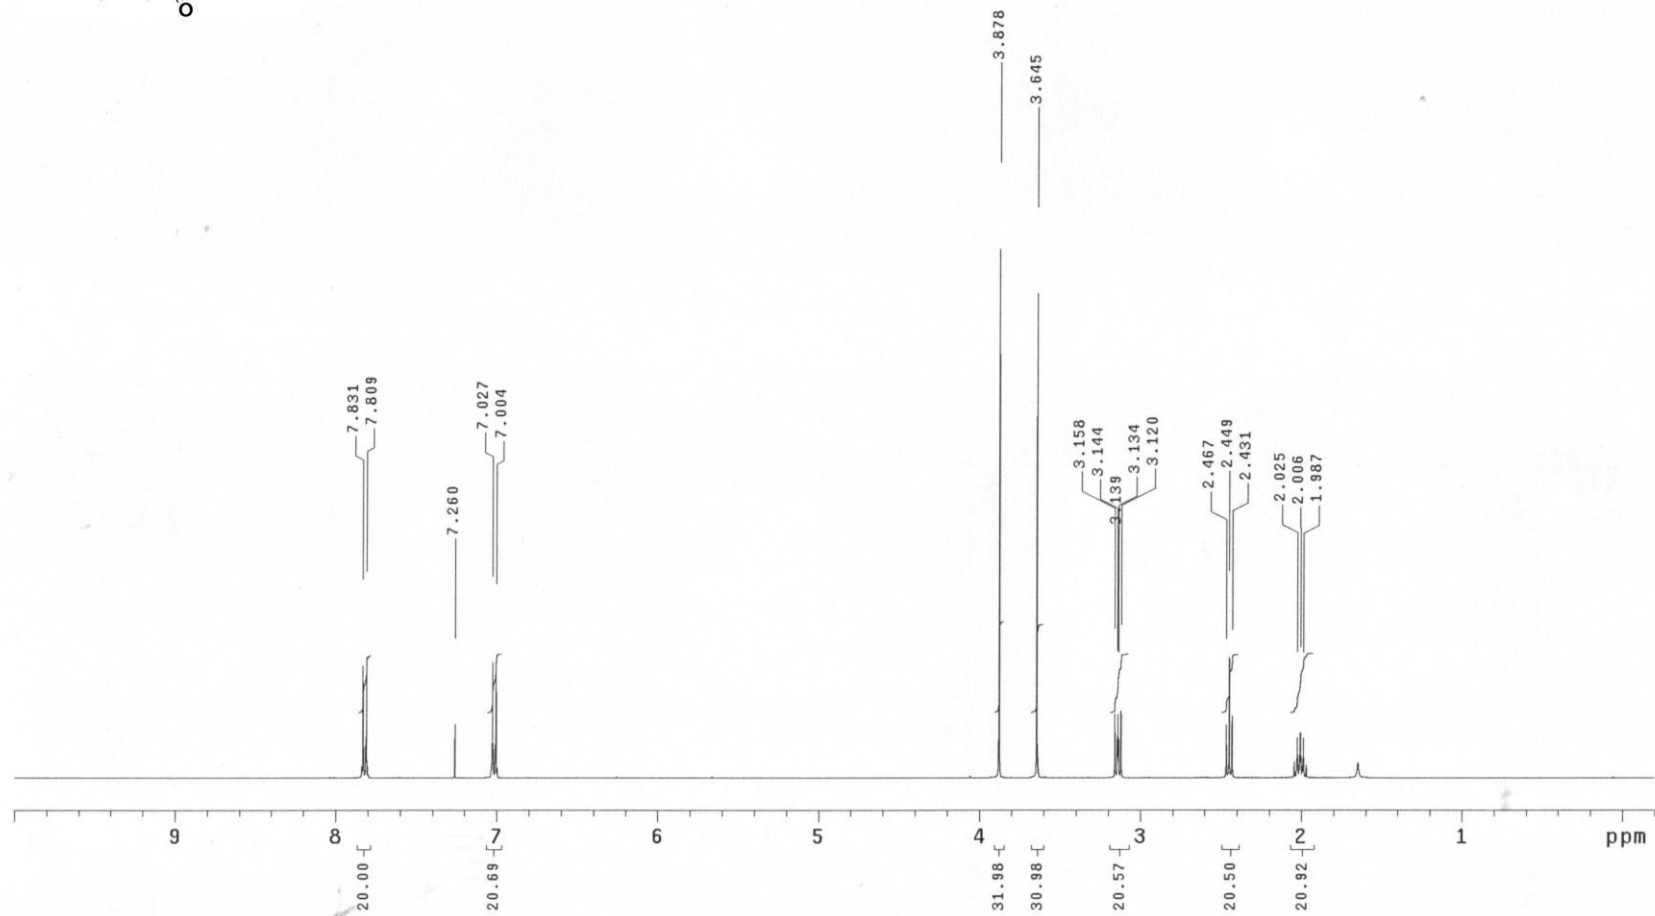

# Compound 5g (<sup>13</sup>C-NMR spectral data)

PS1112-1

Pulse Sequence: s2pu1

UNITYplus-400 "unity400"

Date: Nov 13 2020

Solvent: CDCl<sub>3</sub>

Ambient temperature

Total 2128 repetitions

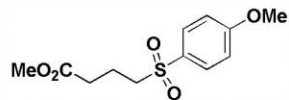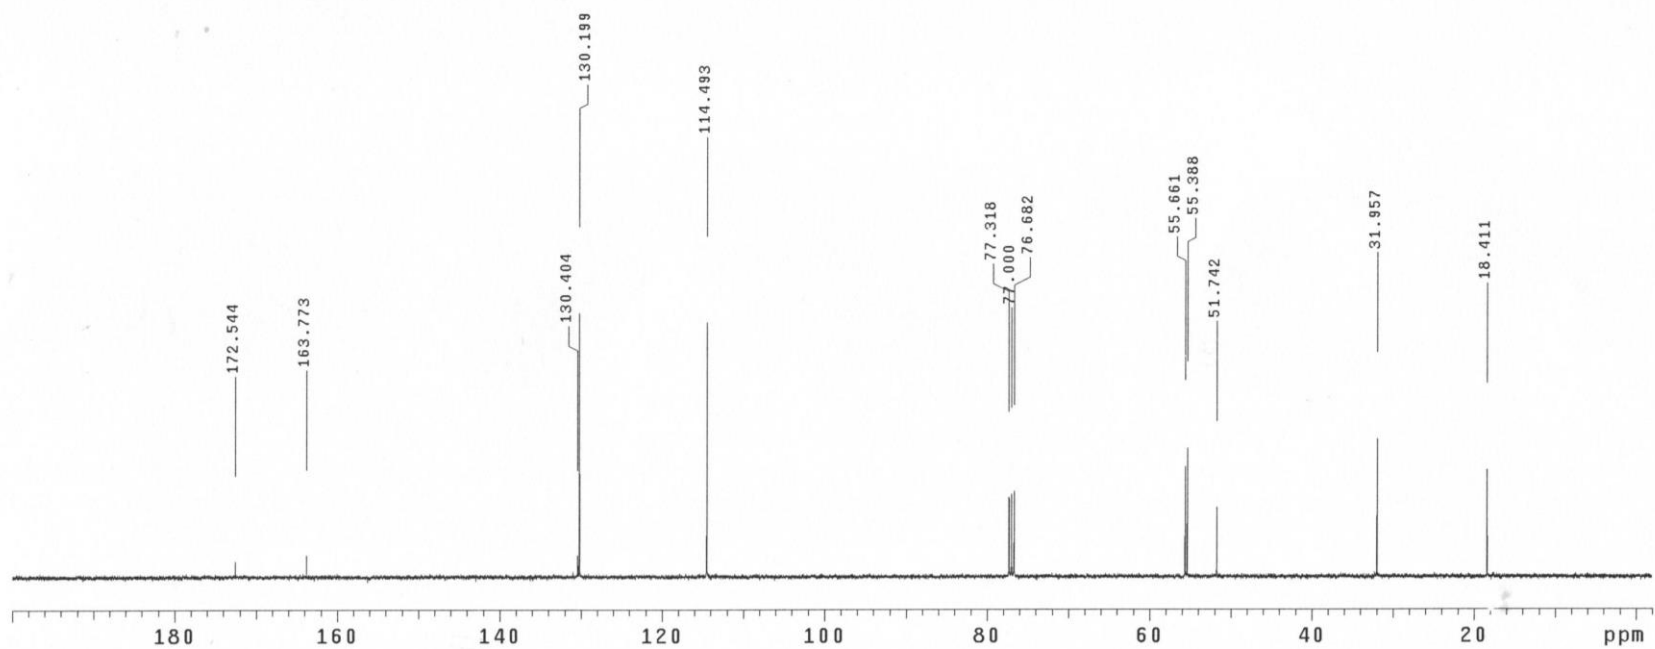

# Compound 5h (<sup>1</sup>H-NMR spectral data)

PS1117-1

Pulse Sequence: s2pu1

UNITYplus-400 "unity400"

Date: Nov 18 2020

Solvent: CDCl<sub>3</sub>

Ambient temperature

Total 32 repetitions

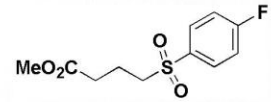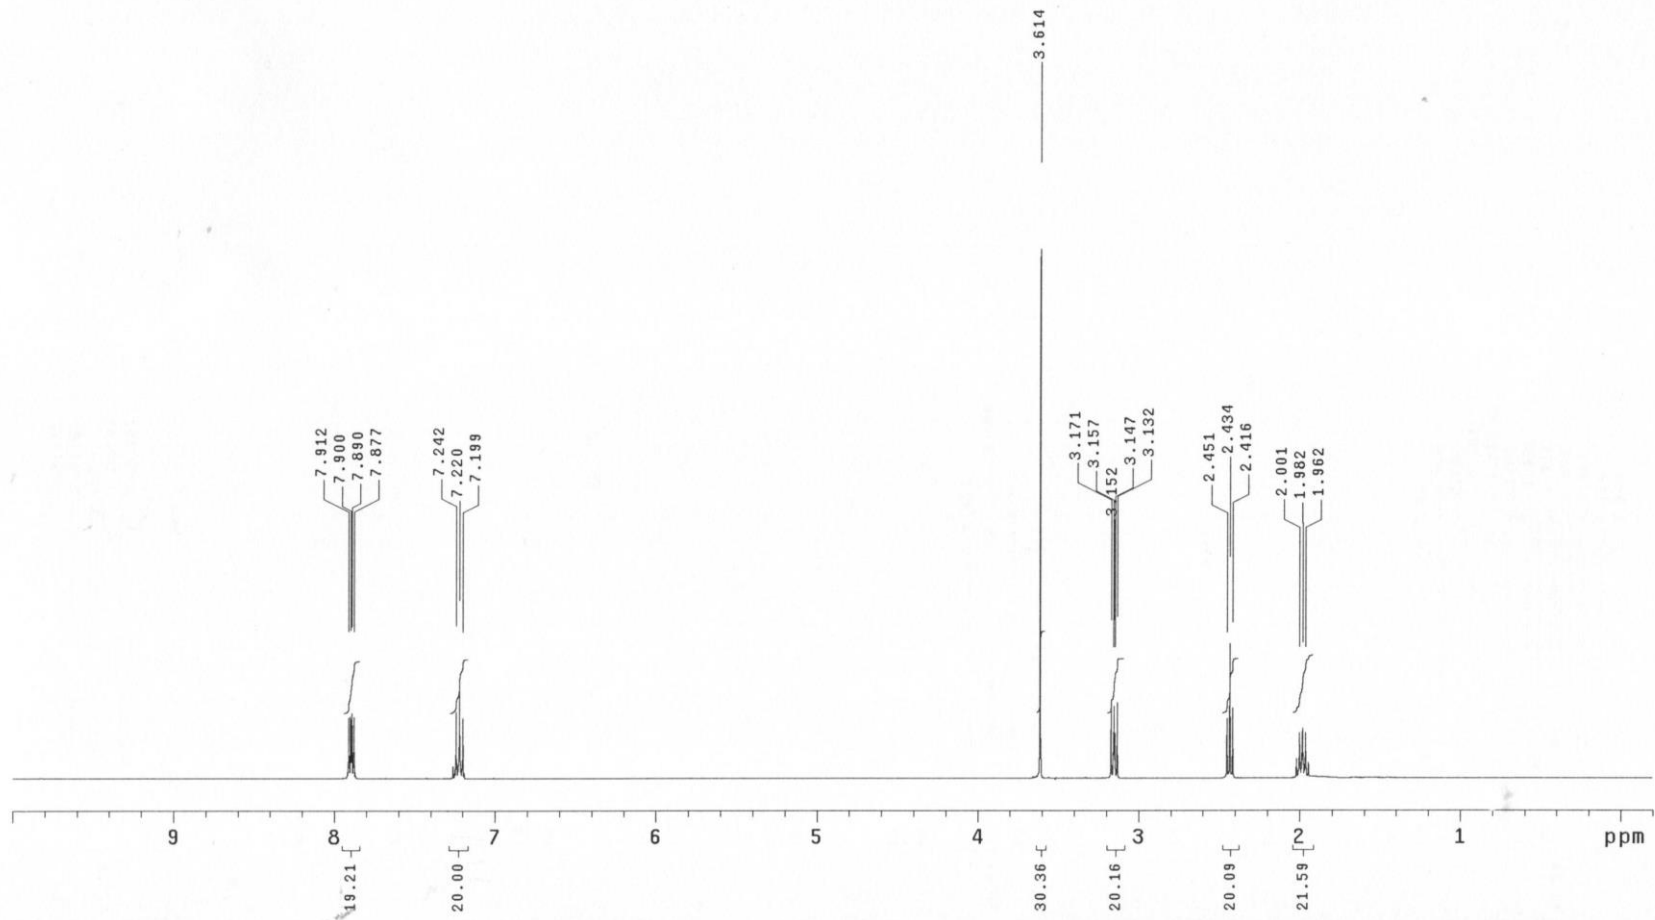

# Compound 5h (<sup>13</sup>C-NMR spectral data)

PS1117-1

Pulse Sequence: s2pu1

UNITYplus-400 "unity400"

Date: Nov 18 2020

Solvent: CDCl<sub>3</sub>

Ambient temperature

Total 1616 repetitions

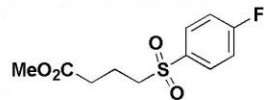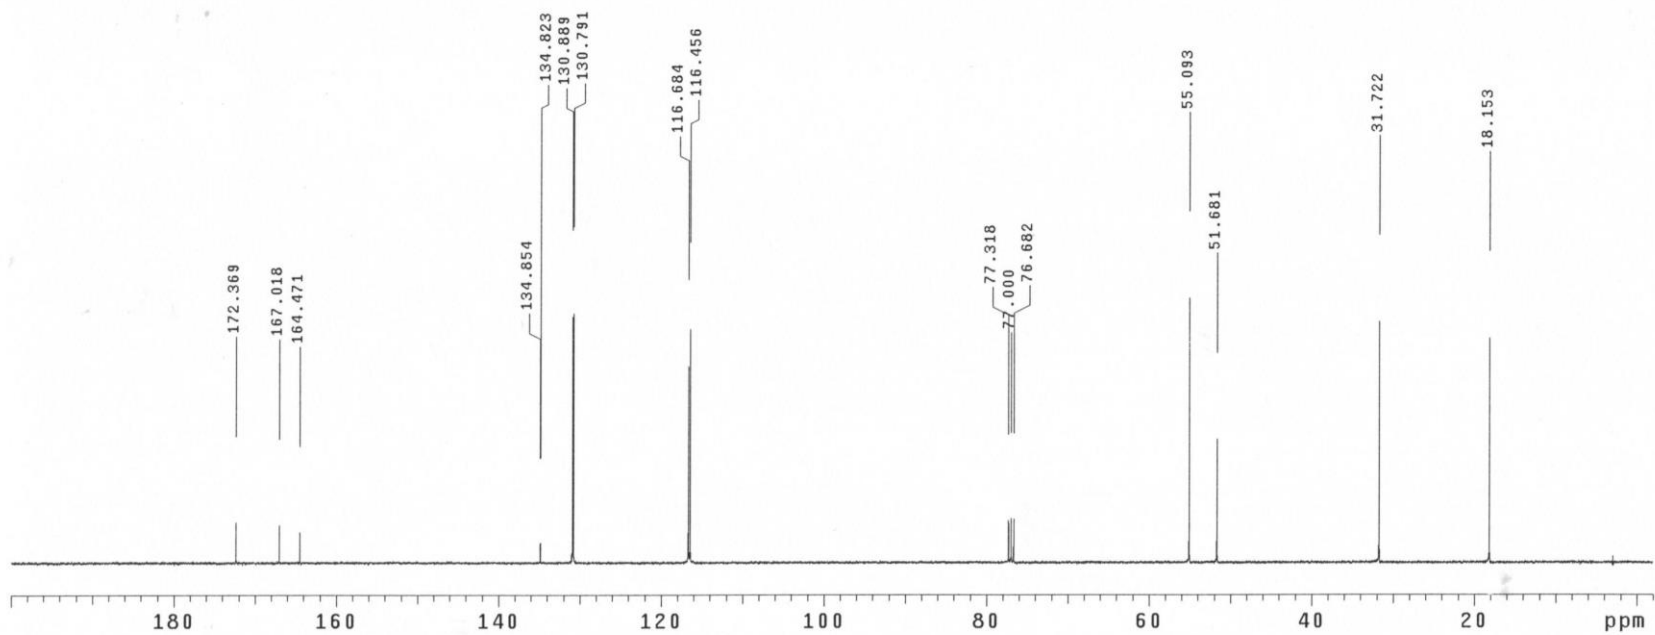

# Compound 5i (<sup>1</sup>H-NMR spectral data)

PS1201-1

Pulse Sequence: s2pu1

UNITYplus-400 "unity400"

Date: Dec 2 2020

Solvent: CDCl<sub>3</sub>

Ambient temperature

Total 32 repetitions

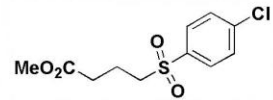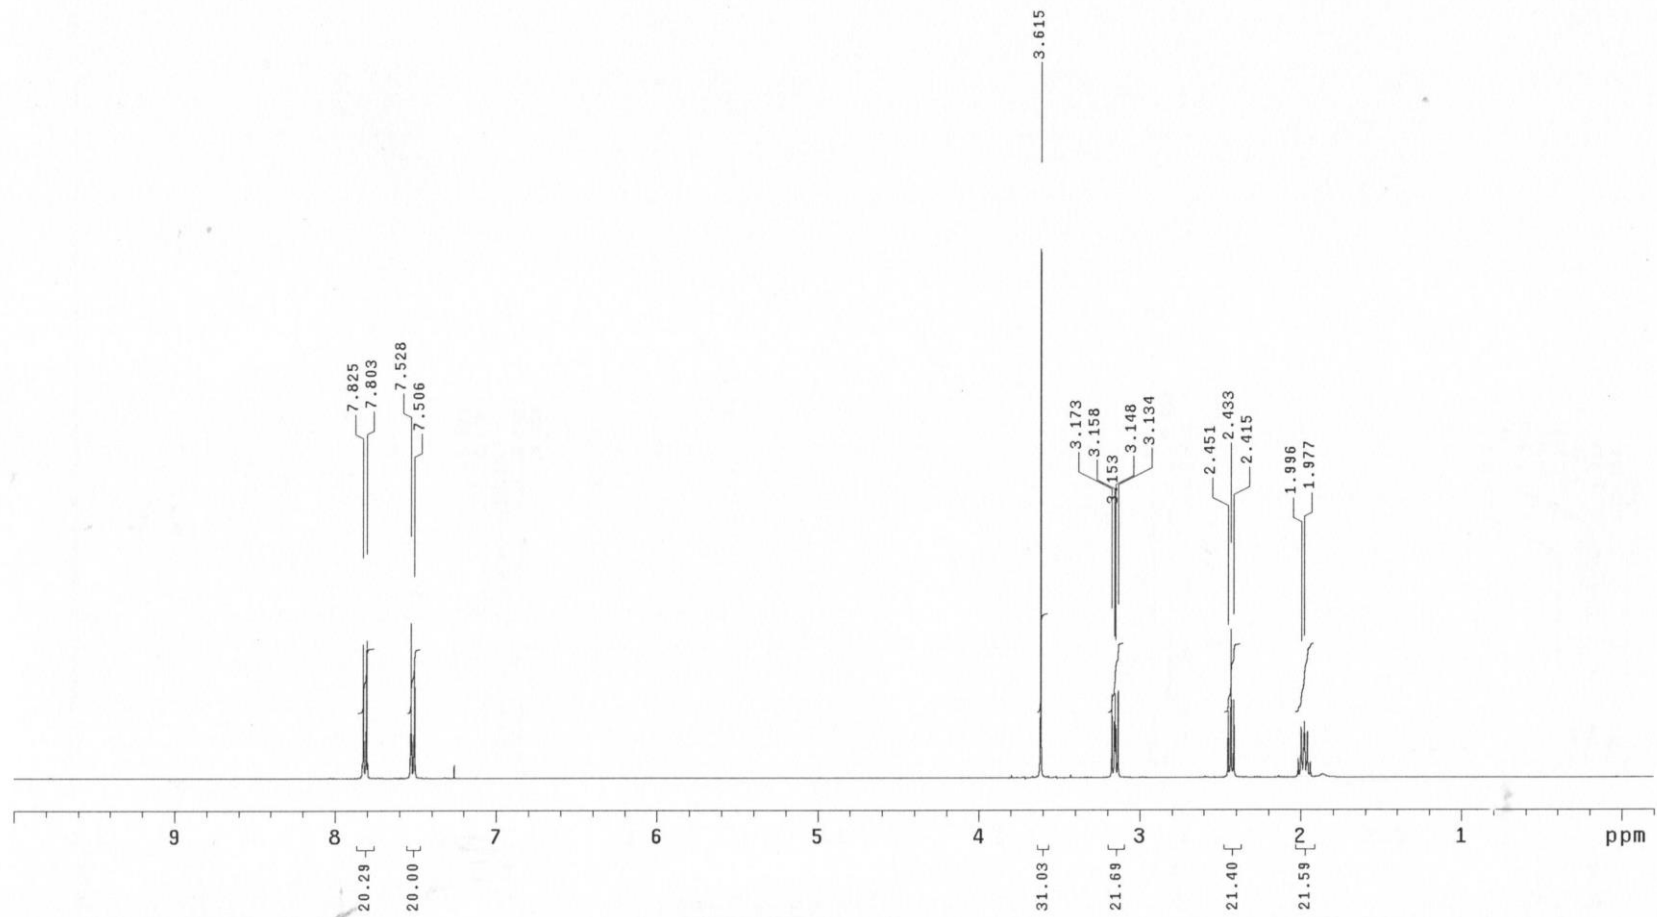

# Compound 5i (<sup>13</sup>C-NMR spectral data)

PS1201-1

Pulse Sequence: s2pu1

UNITYplus-400 "unity400"

Date: Dec 2 2020

Solvent: CDCl<sub>3</sub>

Ambient temperature

Total 640 repetitions

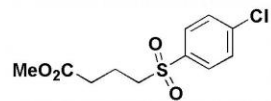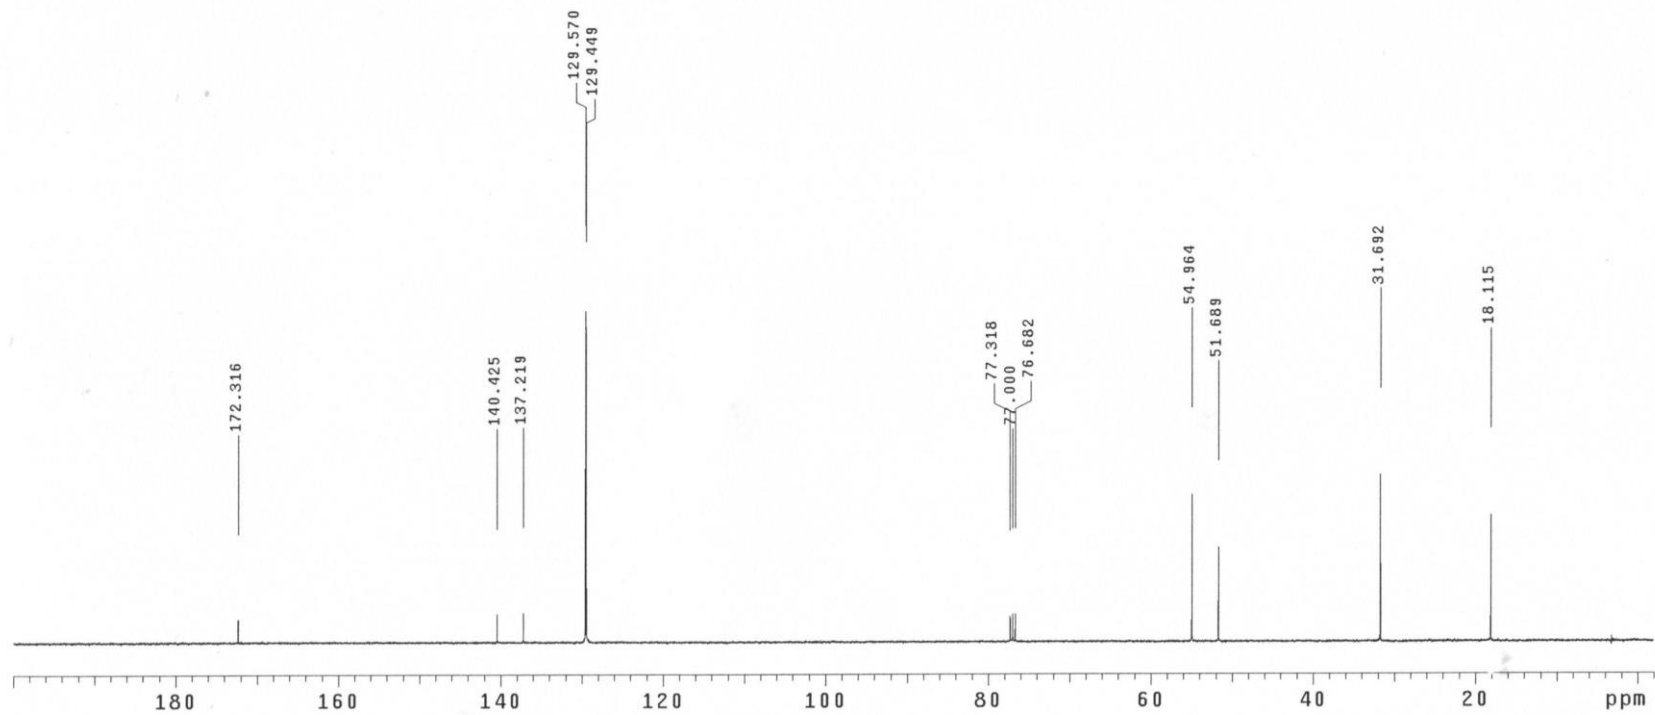

# Compound 5j (<sup>1</sup>H-NMR spectral data)

PS1202-1

Pulse Sequence: s2pu1

UNITYplus-400 "unity400"

Date: Dec 3 2020

Solvent: CDCl<sub>3</sub>

Ambient temperature

Total 32 repetitions

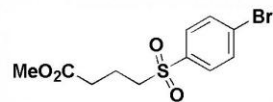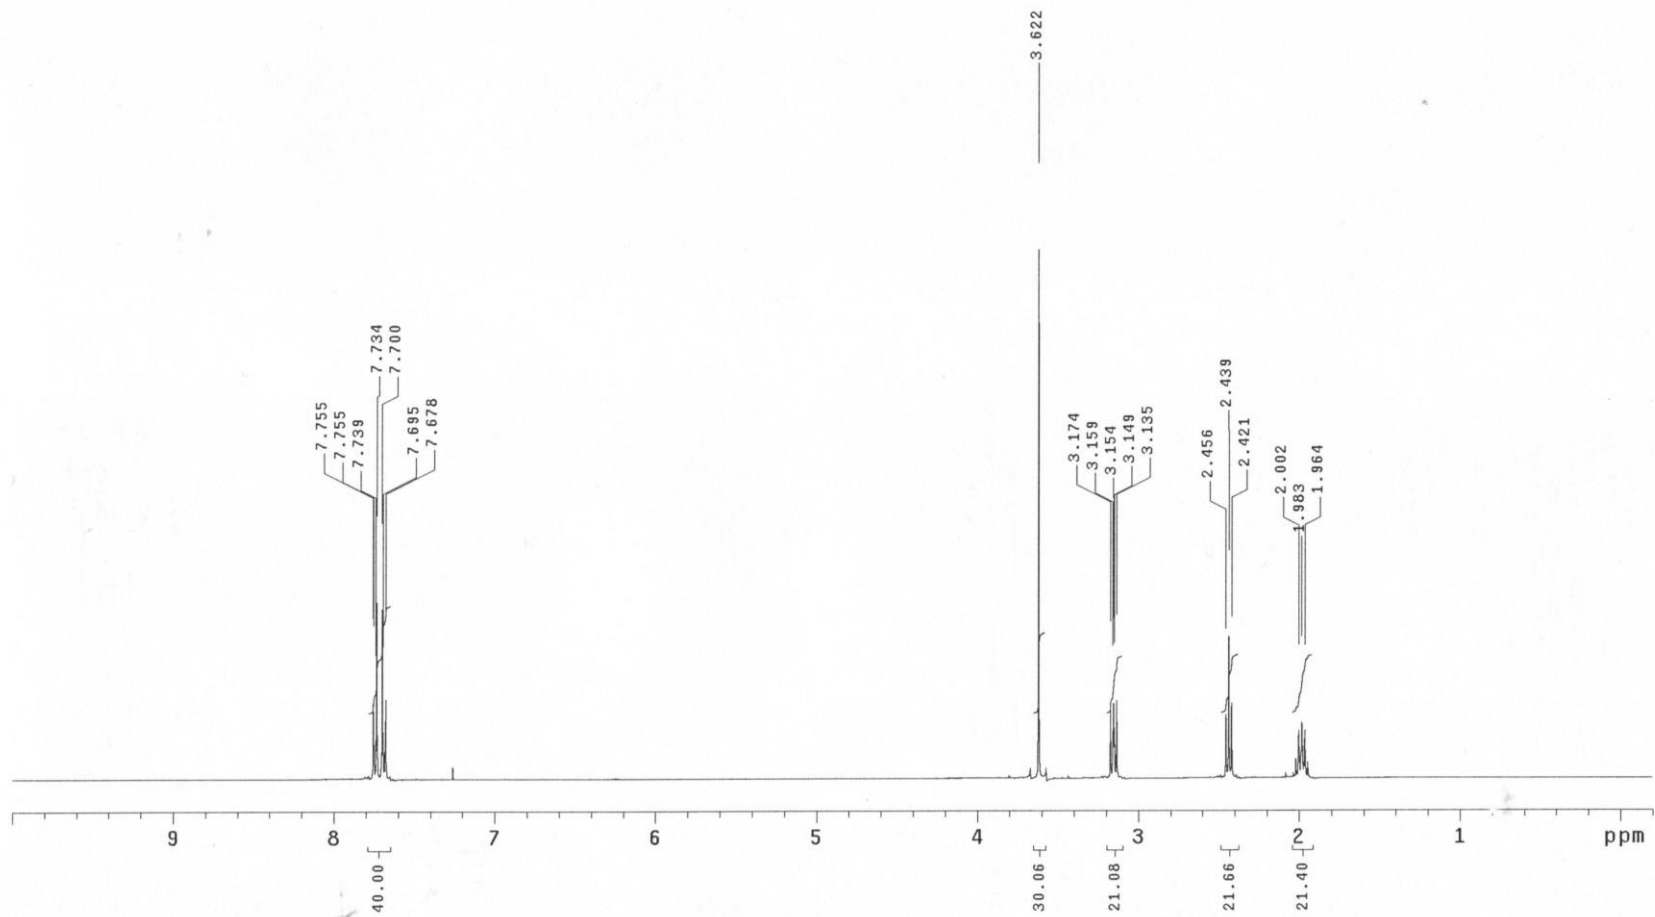



# Compound 5j (<sup>13</sup>C-NMR spectral data)

PS1202-1

Pulse Sequence: s2pu1

UNITYplus-400 "unity400"

Date: Dec 3 2020

Solvent: CDCl<sub>3</sub>

Ambient temperature

Total 352 repetitions

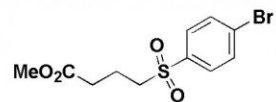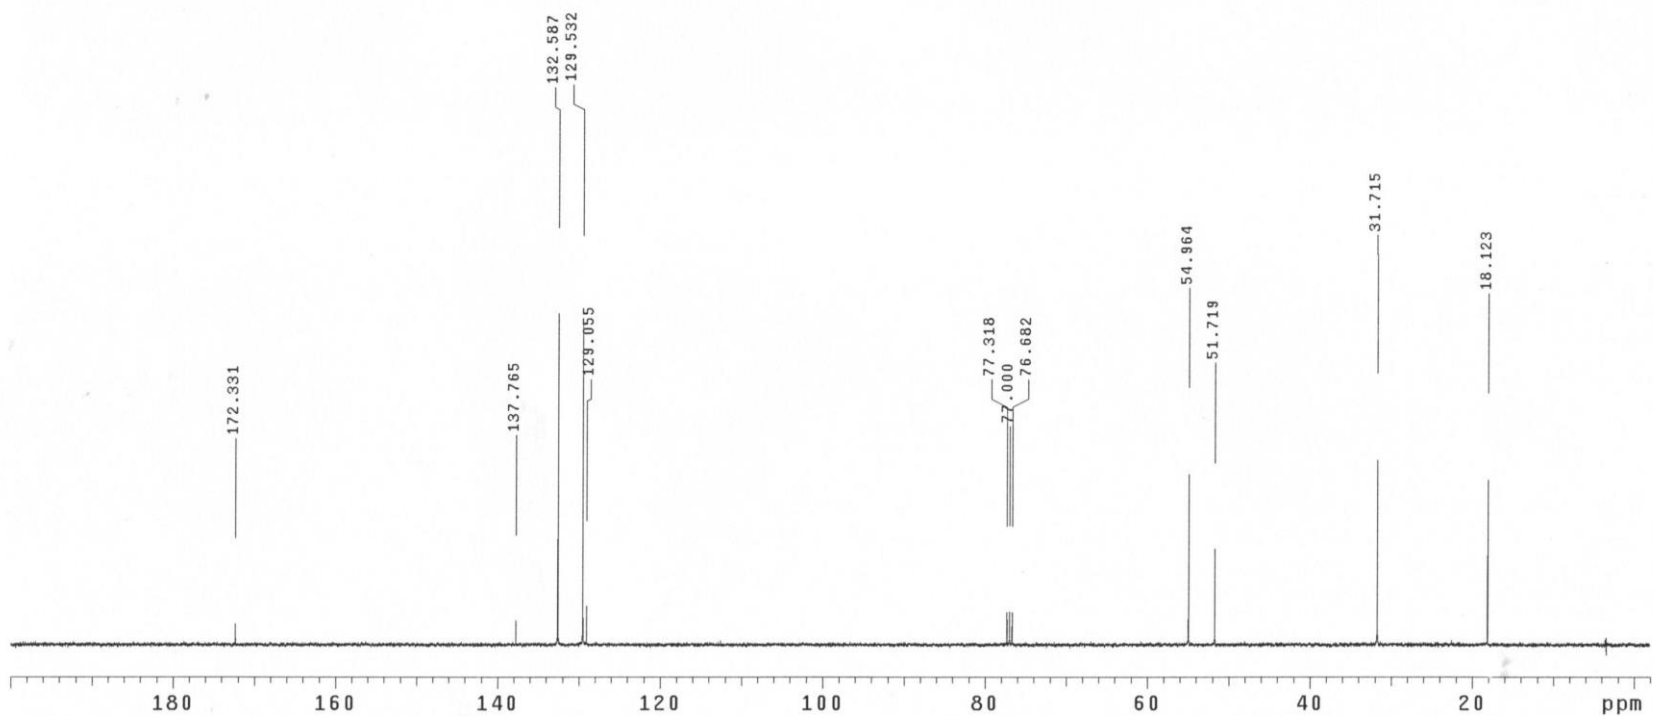

# Compound 5k (<sup>1</sup>H-NMR spectral data)

PS1217-1

Pulse Sequence: s2pul

UNITYplus-400 "unity400"

Date: Dec 17 2020

Solvent: CDCl<sub>3</sub>

Ambient temperature

Total 32 repetitions

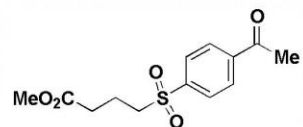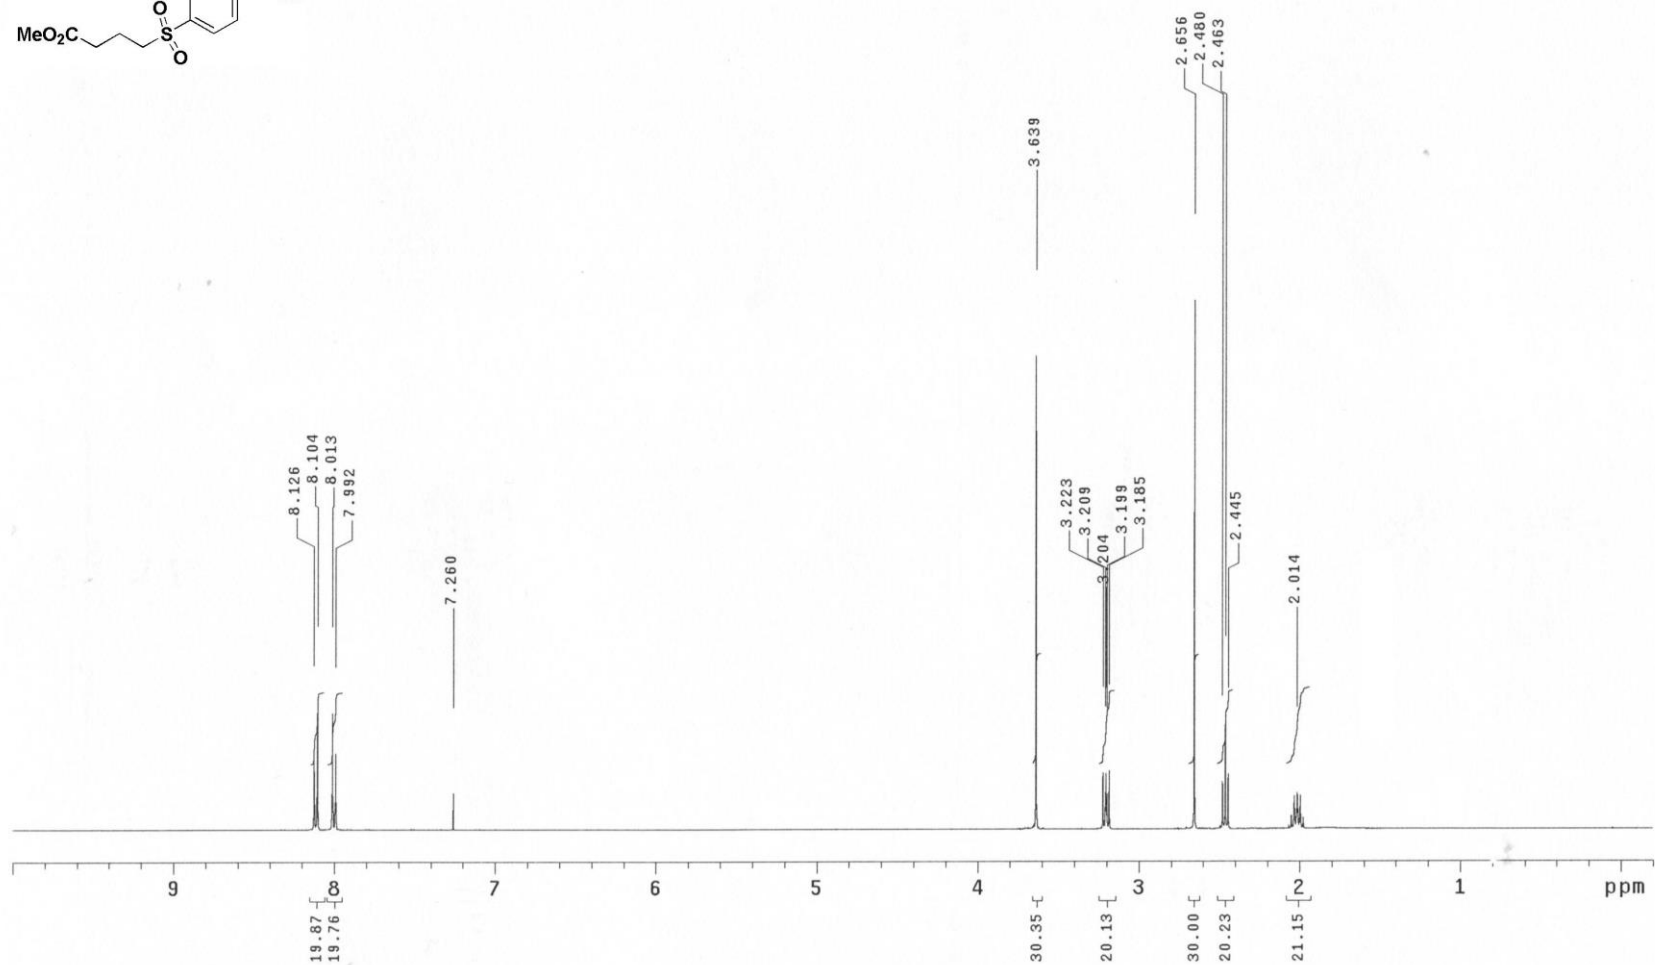

# Compound 5k (<sup>13</sup>C-NMR spectral data)

PS1217-1

Pulse Sequence: s2pu1

UNITYplus-400 "unity400"

Date: Dec 17 2020

Solvent: CDCl<sub>3</sub>

Ambient temperature

Total 768 repetitions

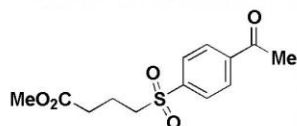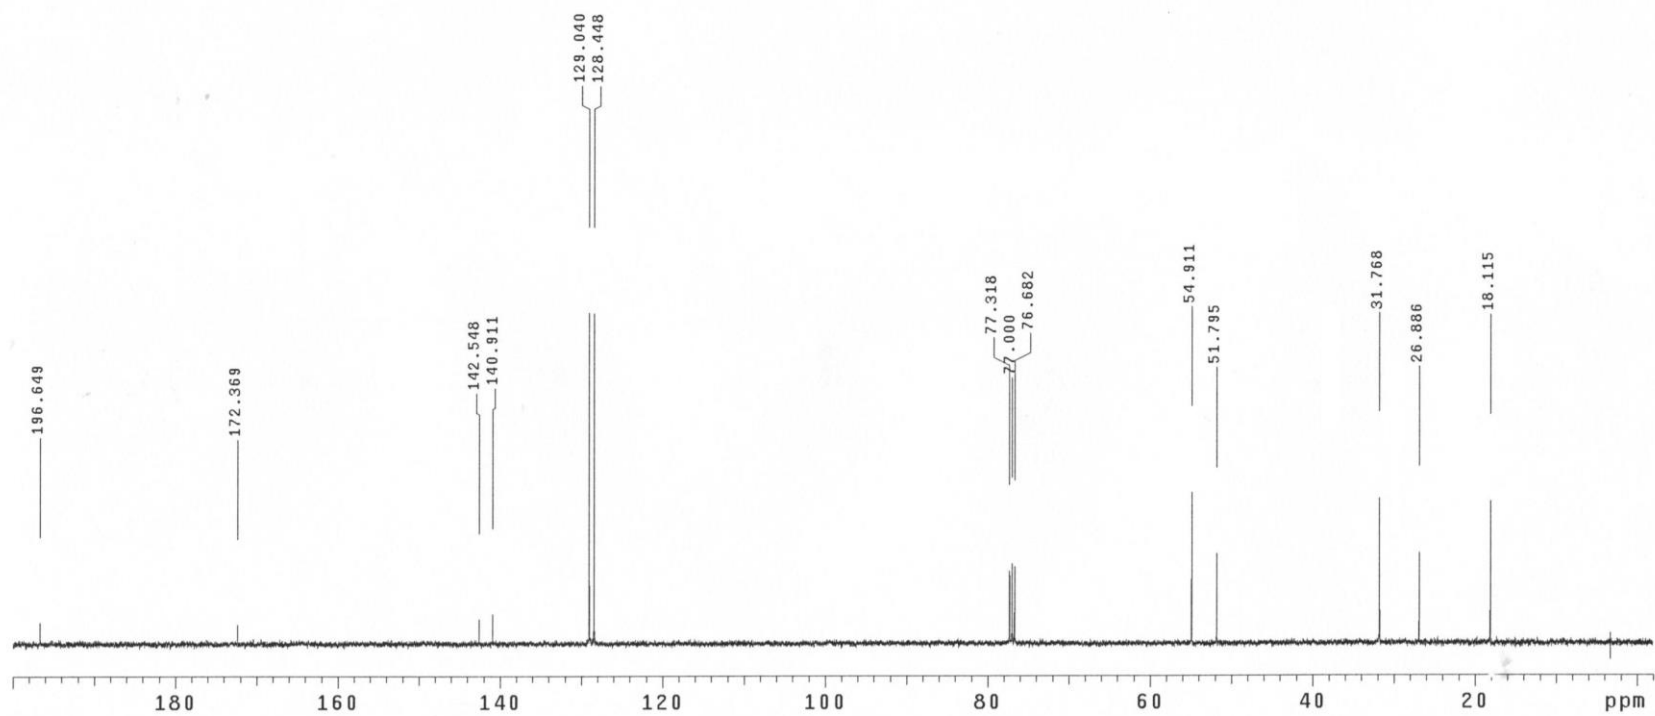

# Compound 5I (<sup>1</sup>H-NMR spectral data)

PS1203-1

Pulse Sequence: s2pu1

UNITYplus-400 "unity400"

Date: Dec 4 2020

Solvent: CDCl<sub>3</sub>

Ambient temperature

Total 64 repetitions

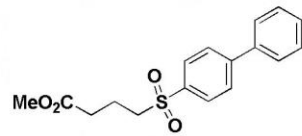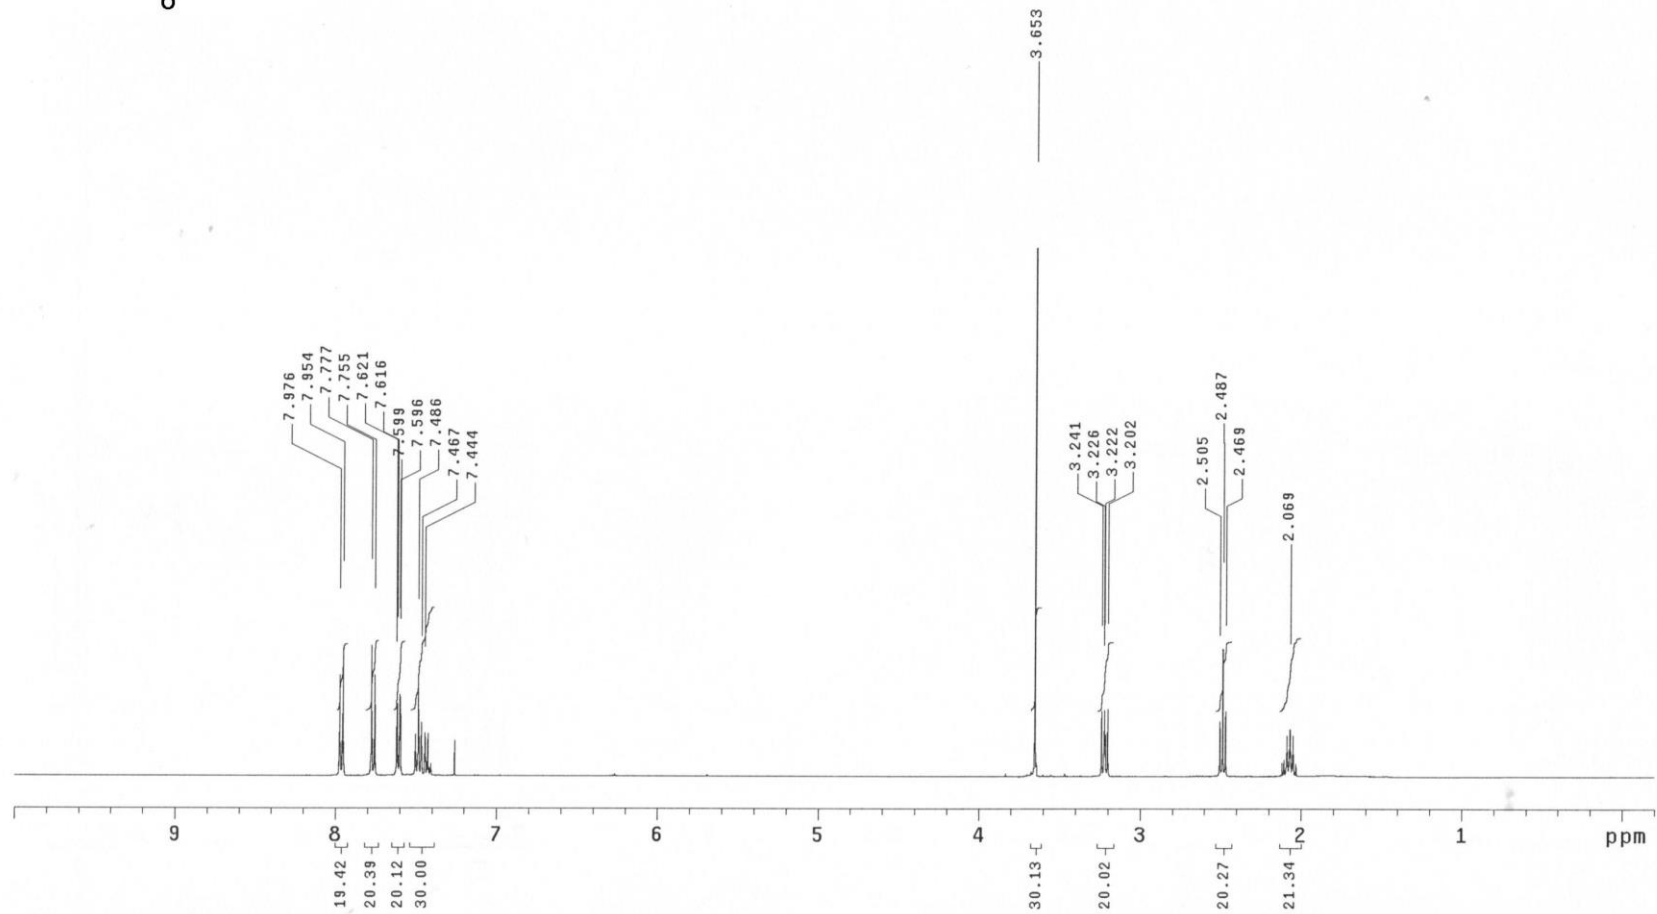

# Compound 5I (<sup>13</sup>C-NMR spectral data)

PS1203-1

Pulse Sequence: s2pu1

UNITYplus-400 "unity400"

Date: Dec 4 2020

Solvent: CDC13

Ambient temperature

Total 416 repetitions

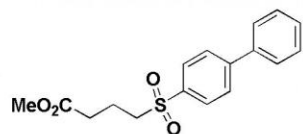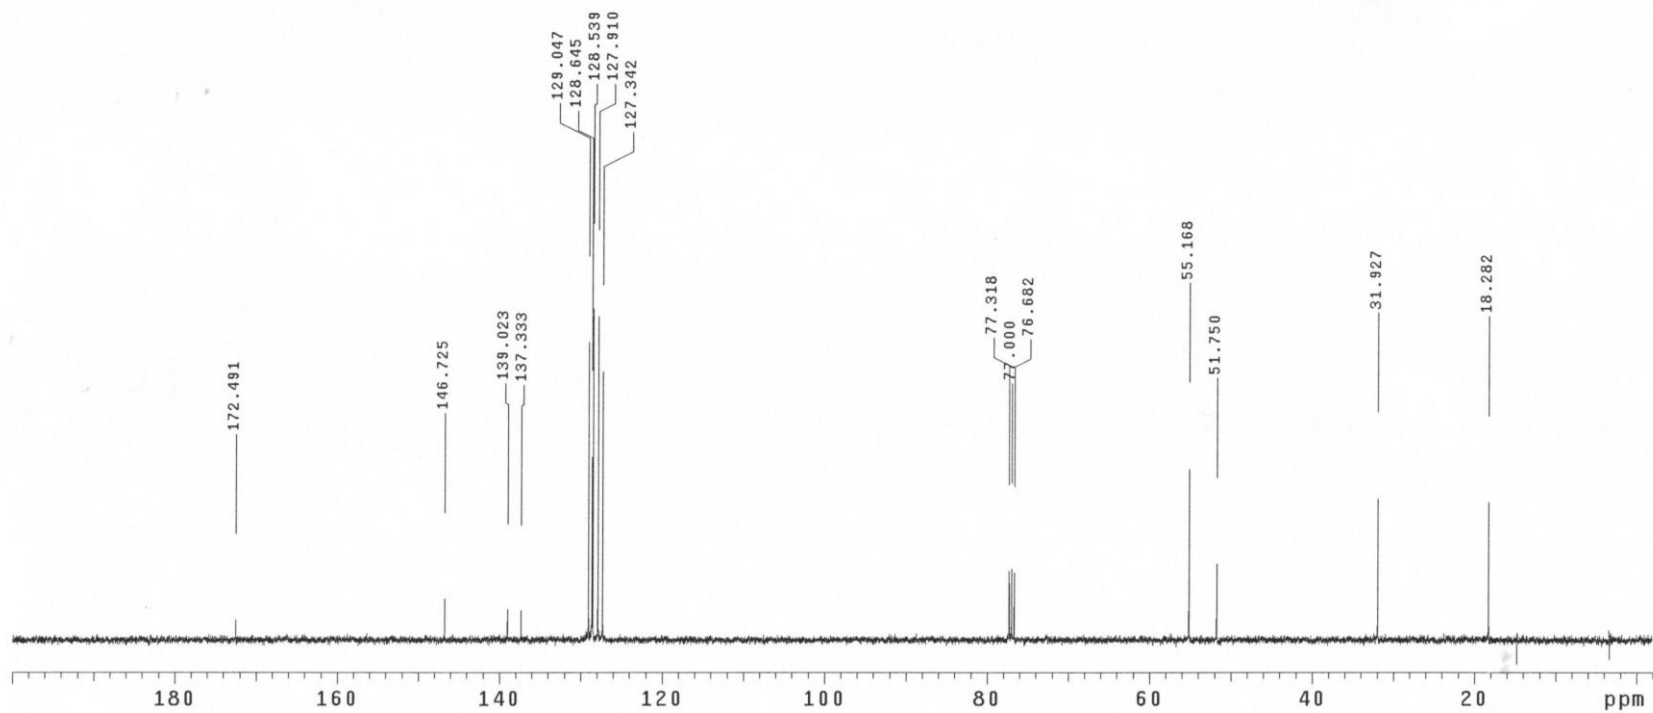

# Compound 5m (<sup>1</sup>H-NMR spectral data)

PS1208-1

Pulse Sequence: s2pu1

UNITYplus-400 "unity400"

Date: Dec 9 2020

Solvent: CDCl<sub>3</sub>

Ambient temperature

Total 32 repetitions

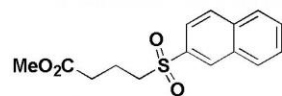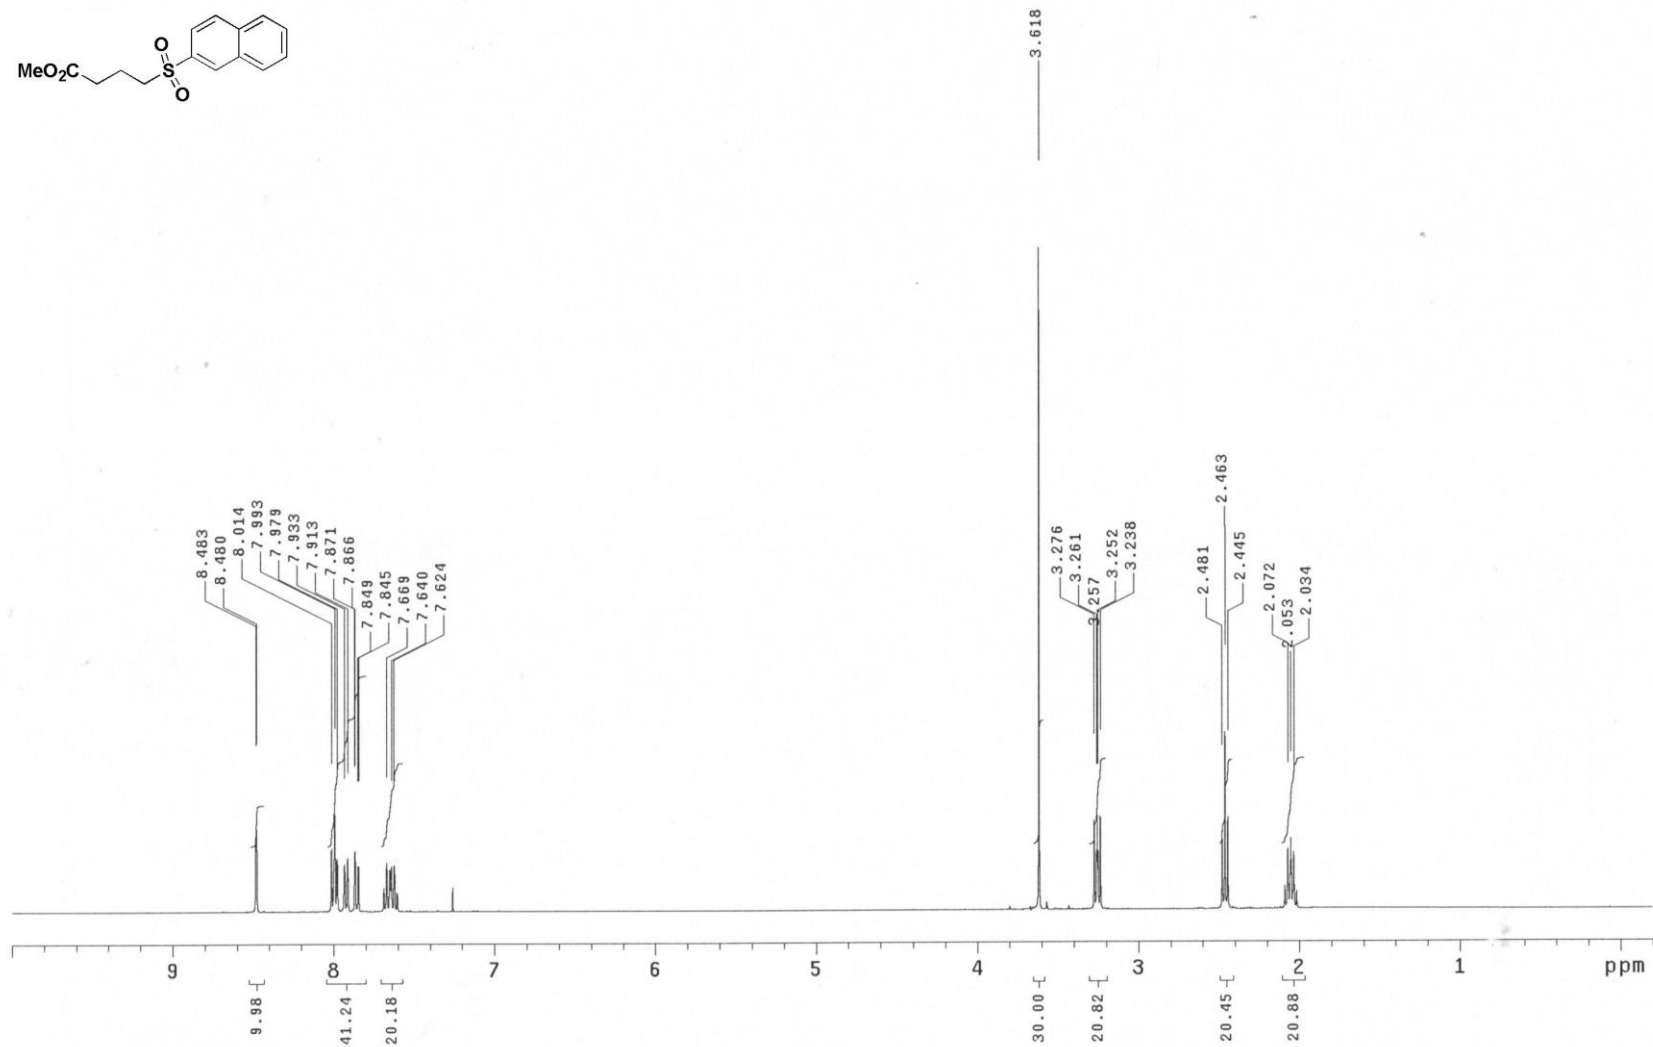

# Compound 5m (<sup>13</sup>C-NMR spectral data)

PS1208-1

Pulse Sequence: s2pu1

UNITYplus-400 "unity400"

Date: Dec 9 2020

Solvent: CDCl<sub>3</sub>

Ambient temperature

Total 2000 repetitions

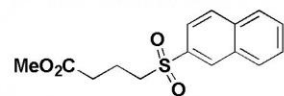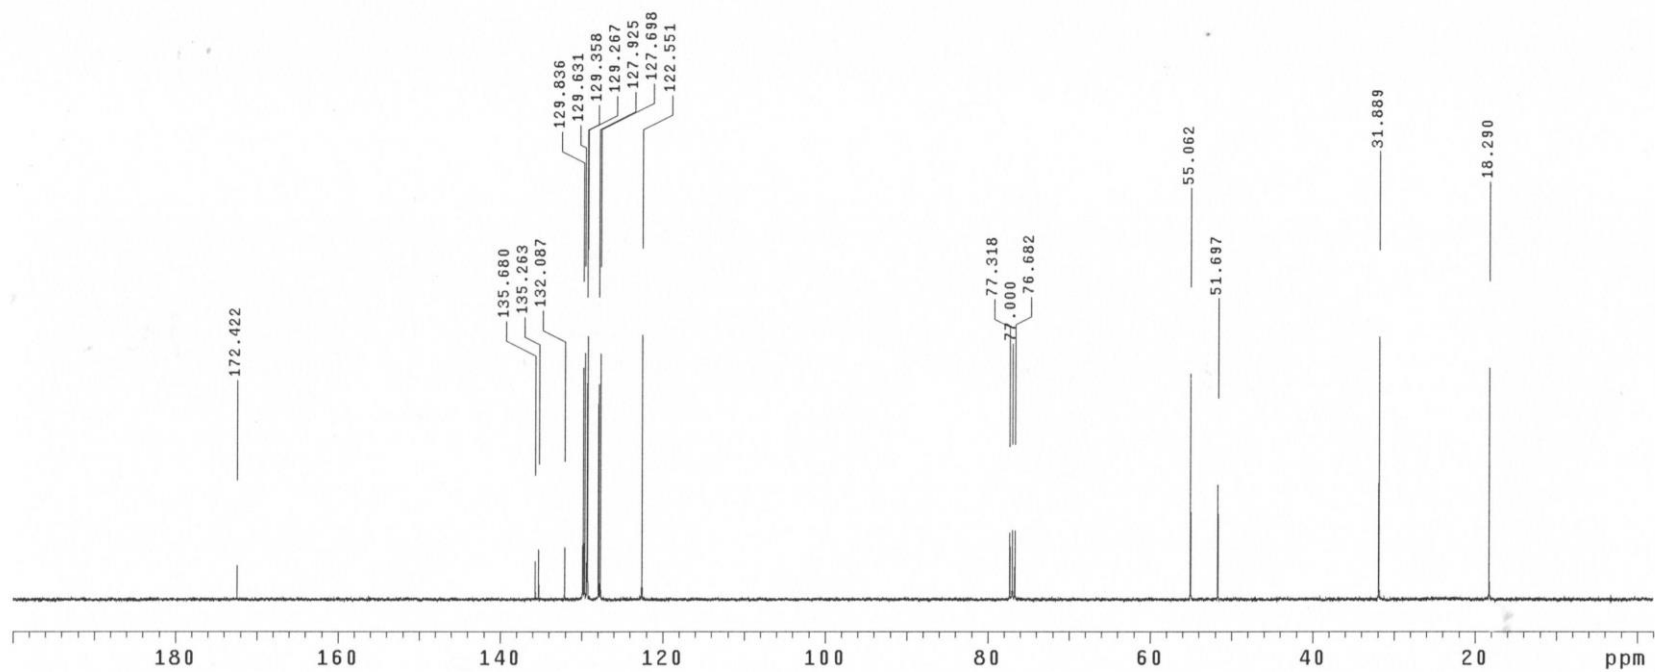

# Compound 5n (<sup>1</sup>H-NMR spectral data)

PS1210-1

Pulse Sequence: s2pu1  
UNITYplus-400 "unity400"  
Date: Dec 11 2020  
Solvent: CDCl<sub>3</sub>  
Ambient temperature  
Total 24 repetitions

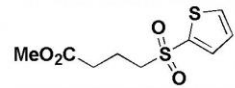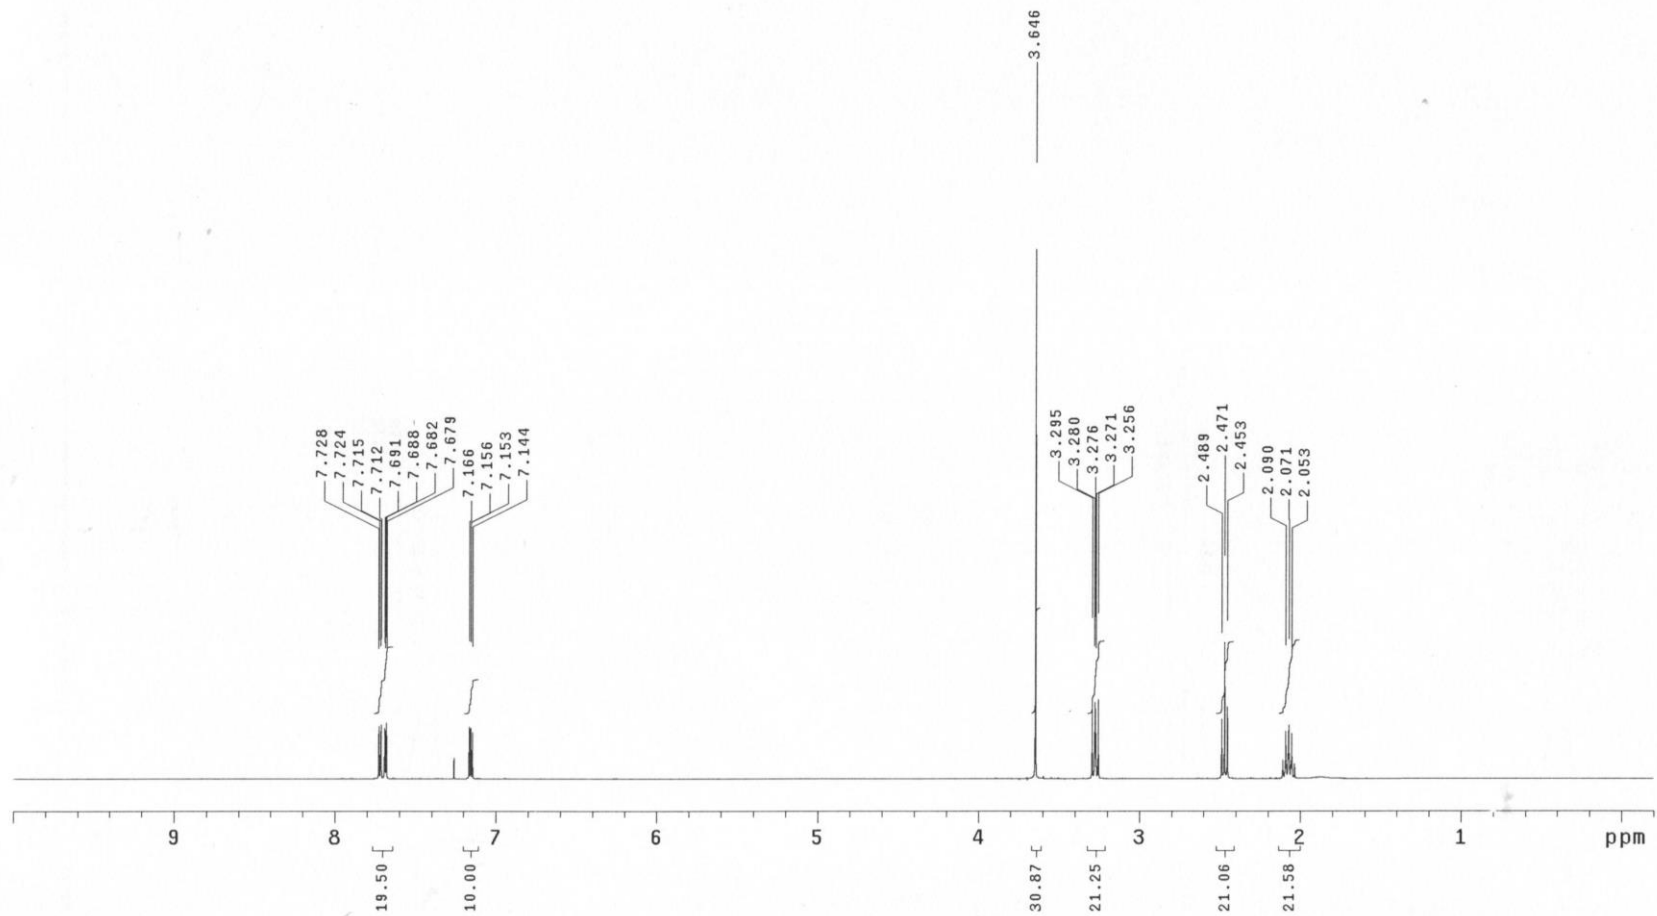



# Compound 5n (<sup>13</sup>C-NMR spectral data)

PS1210-1

Pulse Sequence: s2pu1

UNITYplus-400 "unity400"

Date: Dec 11 2020

Solvent: CDCl<sub>3</sub>

Ambient temperature

Total 1296 repetitions

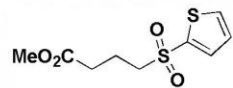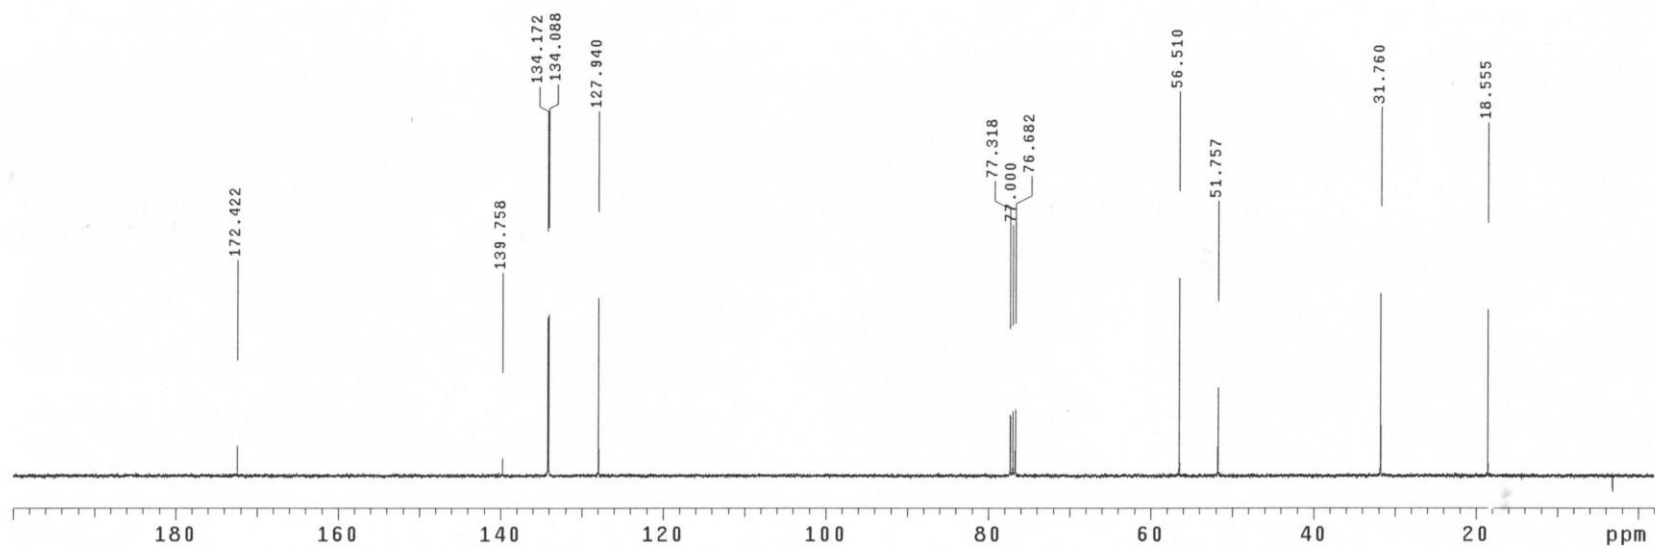

# Compound 5o (<sup>1</sup>H-NMR spectral data)

PS1209-1

Pulse Sequence: s2pu1

UNITYplus-400 "unity400"

Date: Dec 10 2020

Solvent: CDCl<sub>3</sub>

Ambient temperature

Total 32 repetitions

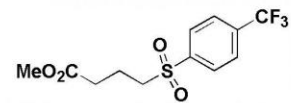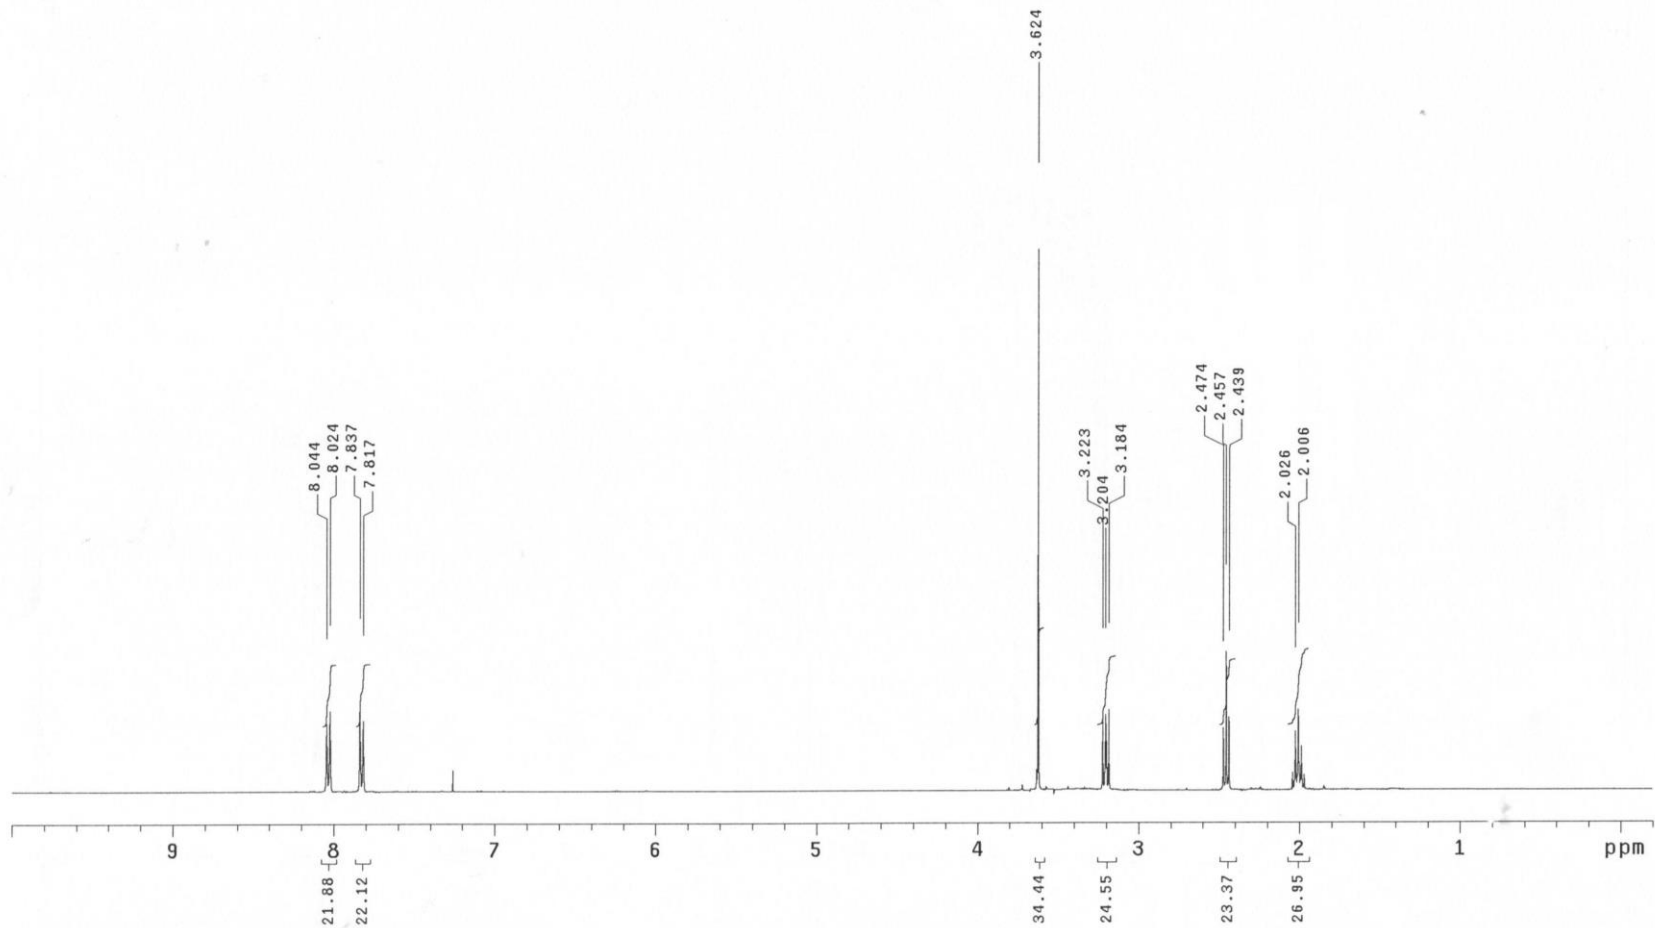

# Compound 5o (<sup>13</sup>C-NMR spectral data)

PS1209-1

Pulse Sequence: s2pu1

UNITYplus-400 "unity400"

Date: Dec 10 2020

Solvent: CDCl<sub>3</sub>

Ambient temperature

Total 1424 repetitions

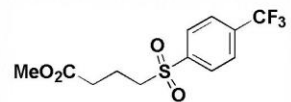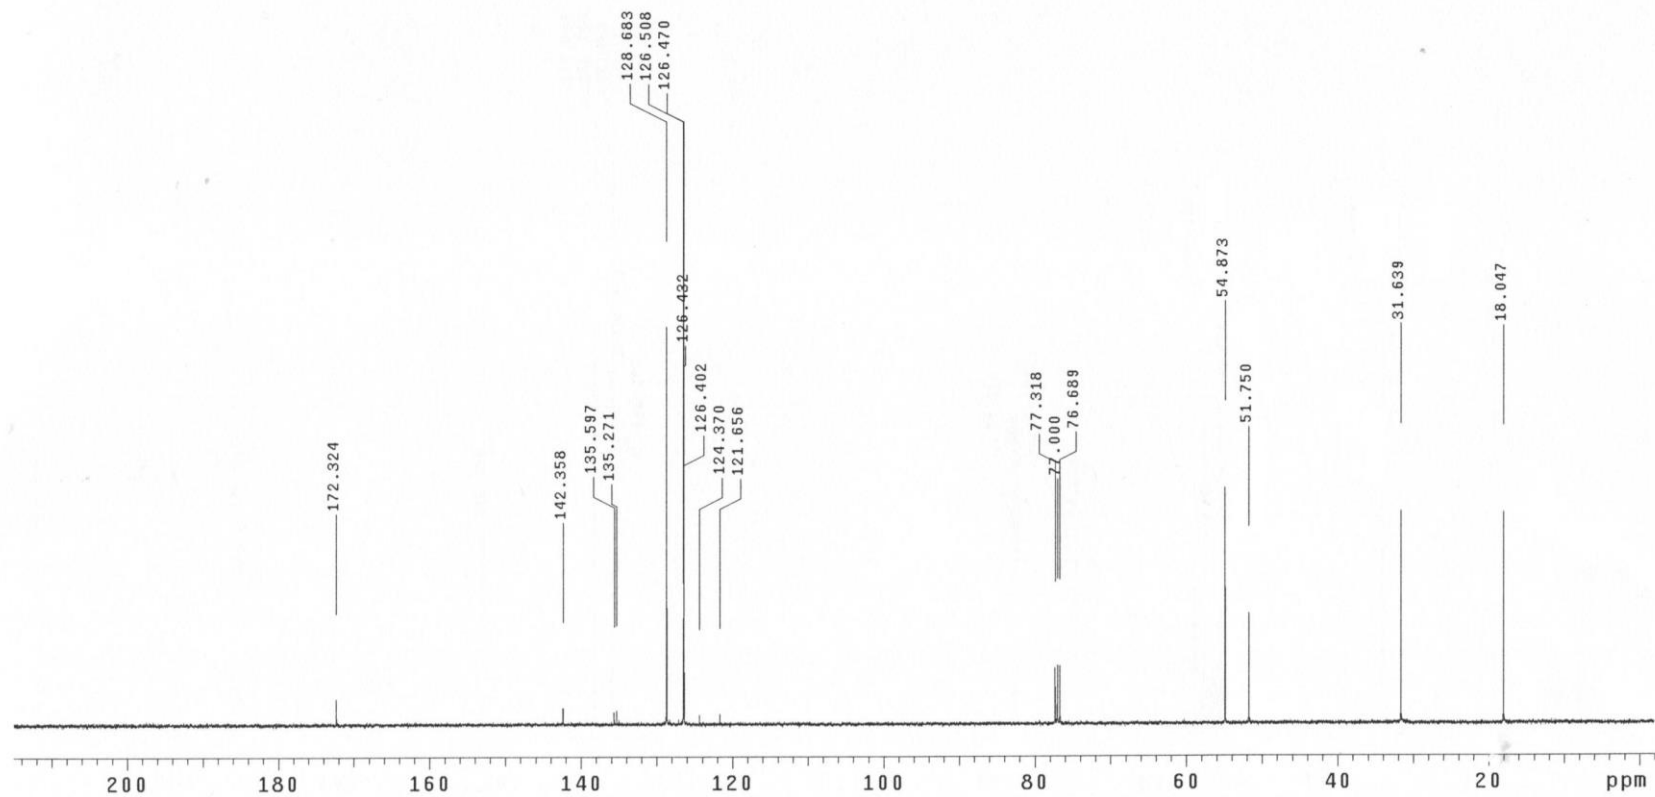

# Compound 5p (<sup>1</sup>H-NMR spectral data)

PS1215-1

Pulse Sequence: s2pu1  
UNITYplus-400 "unity400"  
Date: Dec 16 2020  
Solvent: CDCl3  
Ambient temperature  
Total 32 repetitions

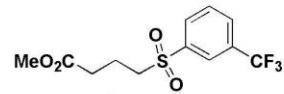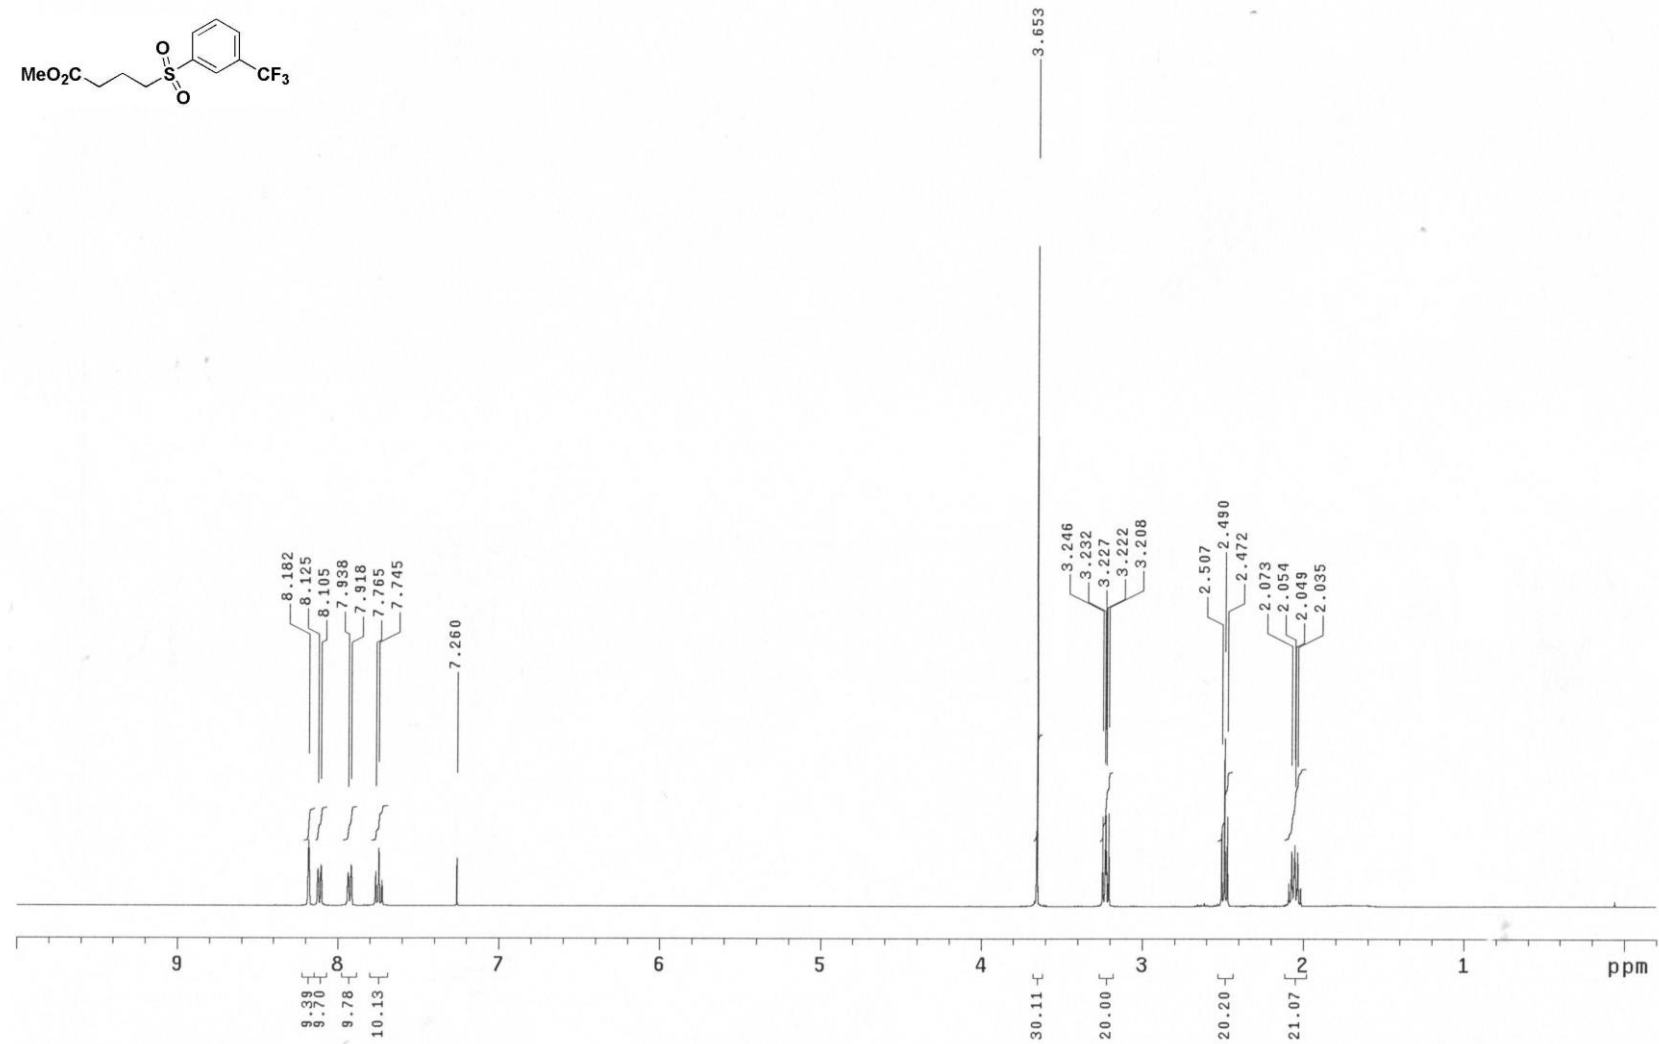

# Compound 5p (<sup>13</sup>C-NMR spectral data)

PS1215-1

Pulse Sequence: s2pu1

UNITYplus-400 "unity400"

Date: Dec 16 2020

Solvent: CDC13

Ambient temperature

Total 7056 repetitions

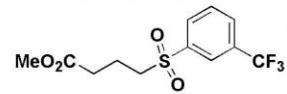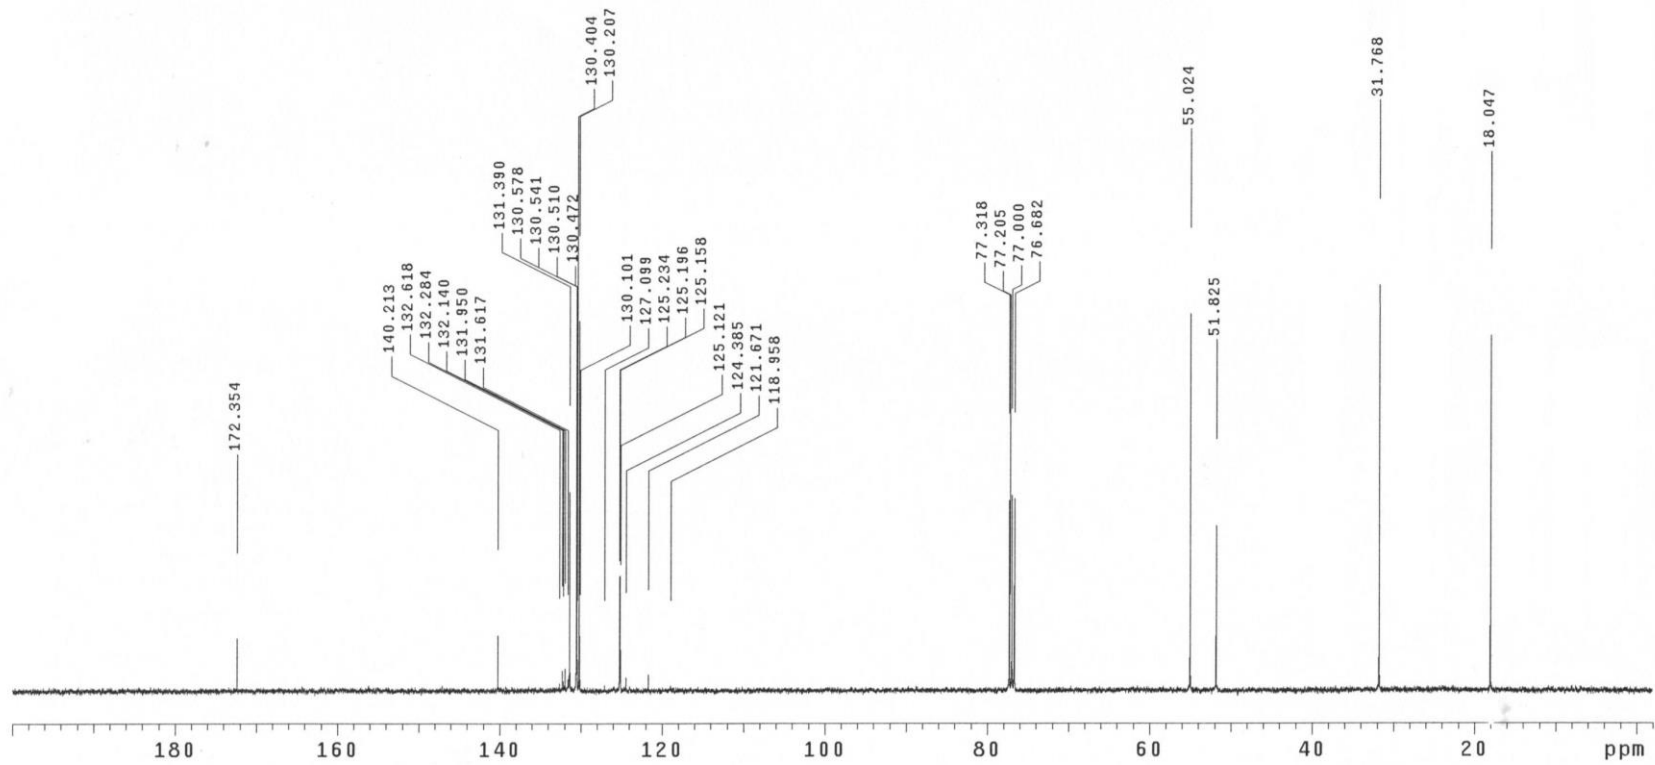

# Compound 5q (<sup>1</sup>H-NMR spectral data)

PS0107-1

Pulse Sequence: s2pu1  
UNITYplus-400 "unity400"  
Date: Jan 7 2021  
Solvent: CDCl<sub>3</sub>  
Ambient temperature  
Total 32 repetitions

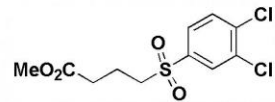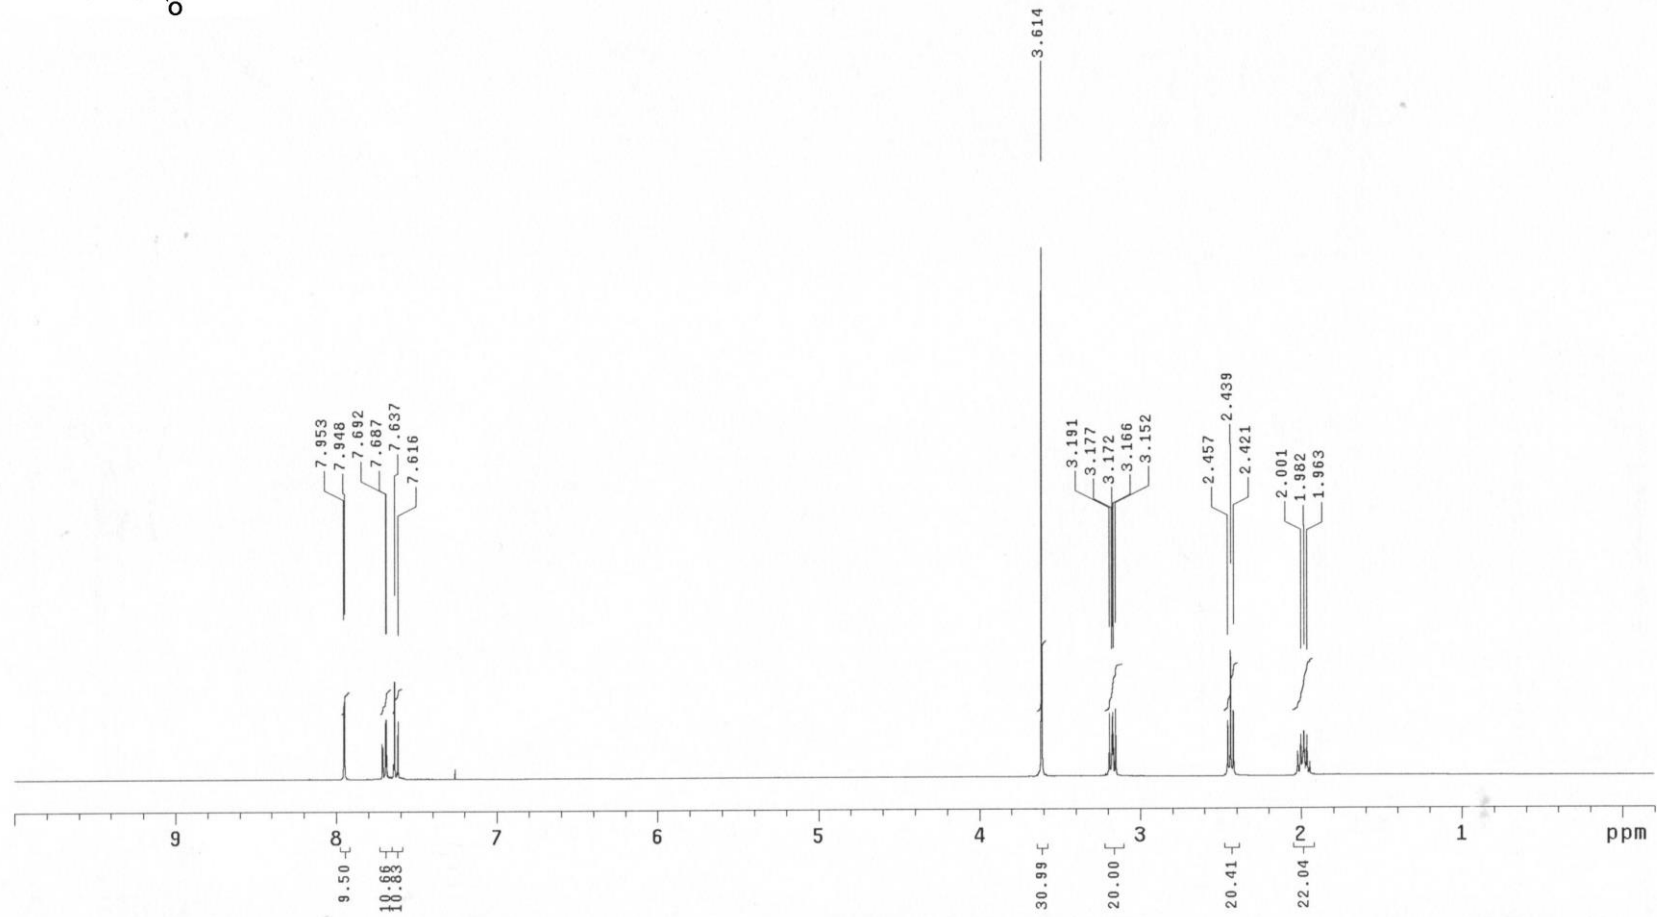

# Compound 5q (<sup>13</sup>C-NMR spectral data)

PS0107-1

Pulse Sequence: s2pu1  
UNITYplus-400 "unity400"  
Date: Jan 7 2021  
Solvent: CDC13  
Ambient temperature  
Total 512 repetitions

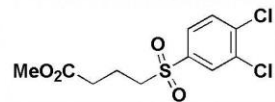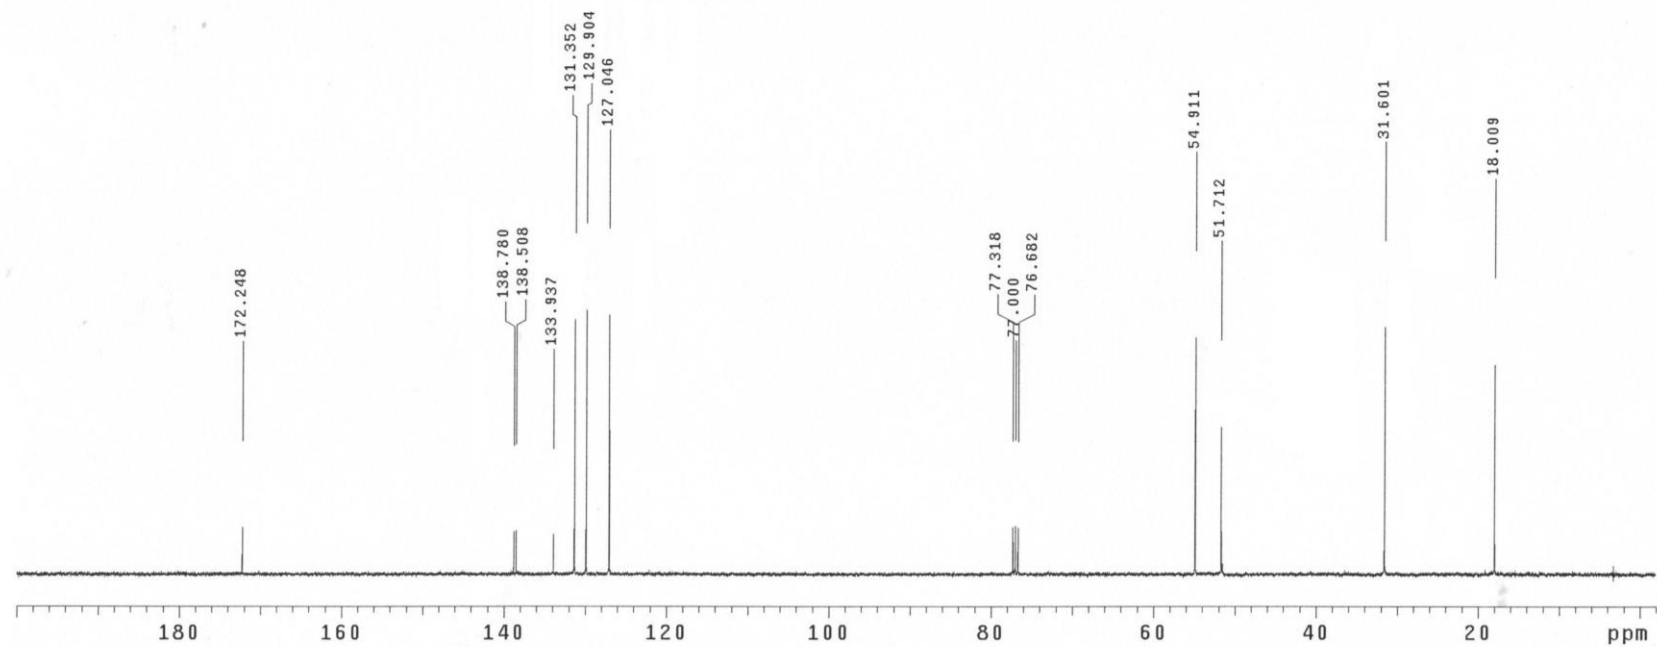

# Compound 5r (<sup>1</sup>H-NMR spectral data)

PS1100122

Pulse Sequence: s2pu1

UNITYplus-400 "unity400"

Date: Jan 25 2021

Solvent: CDCl<sub>3</sub>

Ambient temperature

Total 32 repetitions

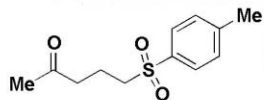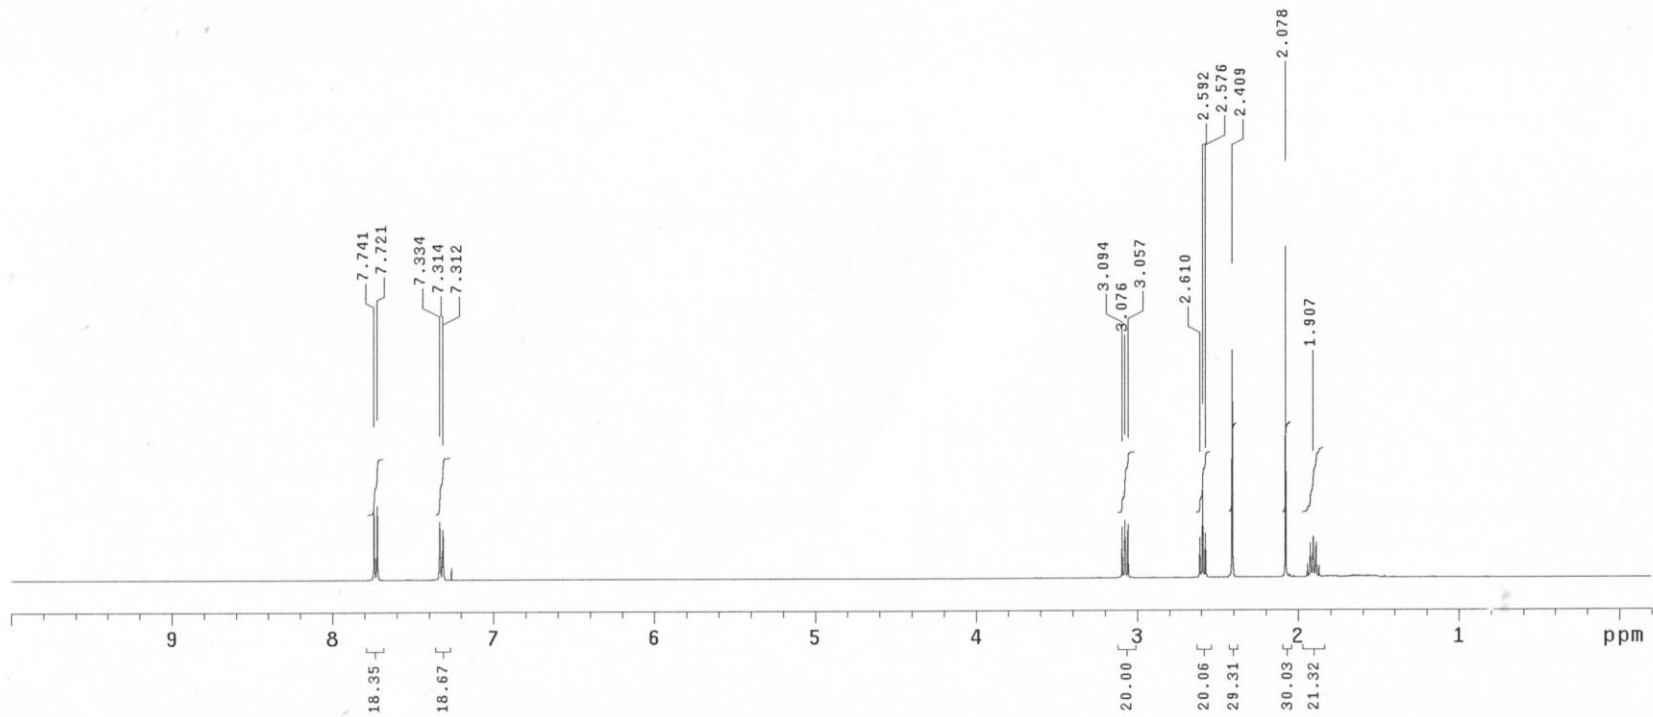



# Compound 5r (<sup>13</sup>C-NMR spectral data)

PS1100122

Pulse Sequence: s2pu1

UNITYplus-400 "unity400"

Date: Jan 25 2021

Solvent: CDCl<sub>3</sub>

Ambient temperature

Total 480 repetitions

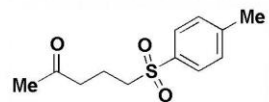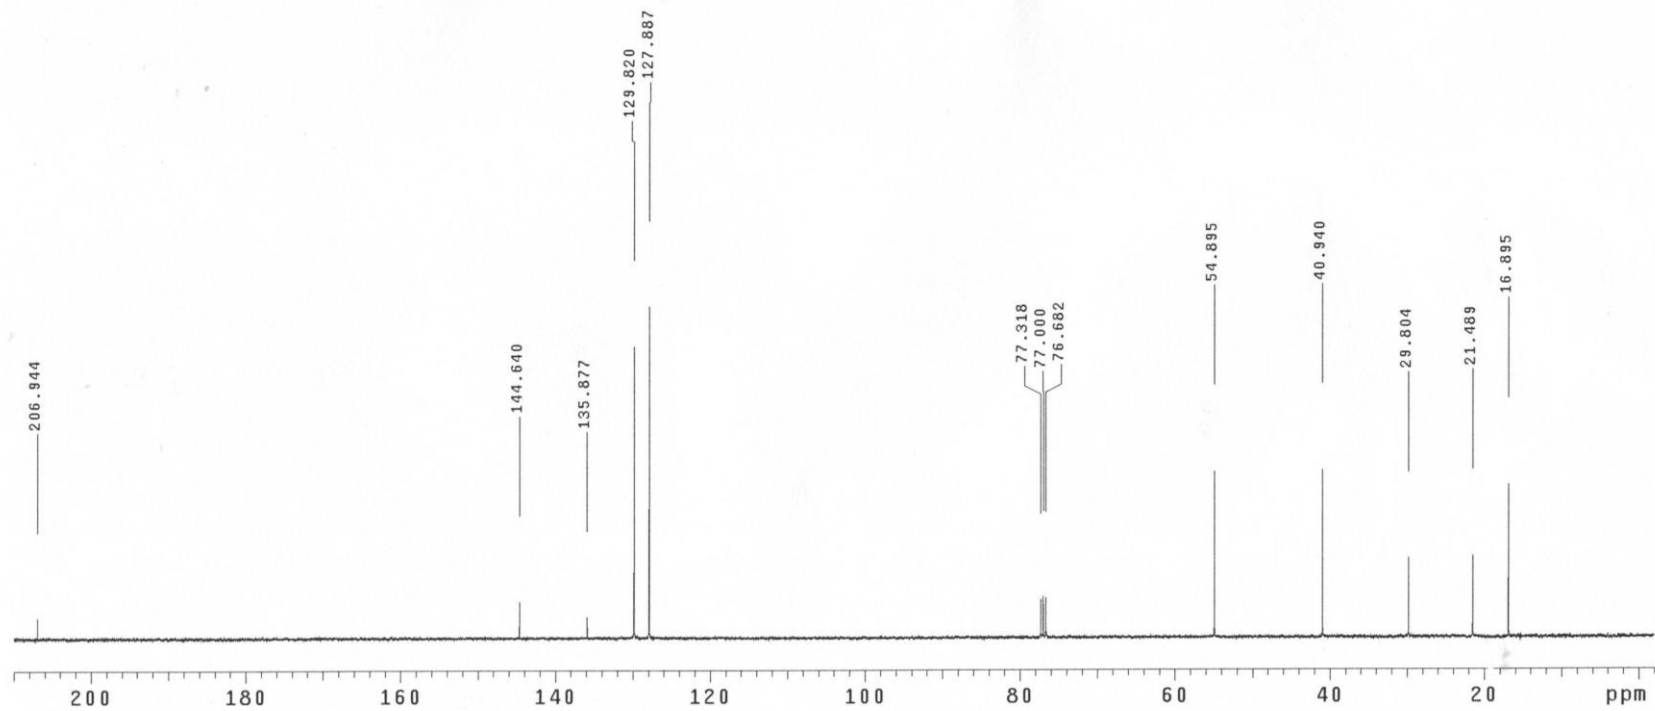

# Compound 5t (<sup>1</sup>H-NMR spectral data)

PS0104-1

Pulse Sequence: s2pu1

UNITYplus-400 "unity400"

Date: Jan 5 2021

Solvent: CDCl<sub>3</sub>

Ambient temperature

Total 32 repetitions

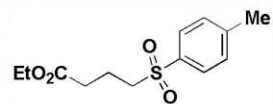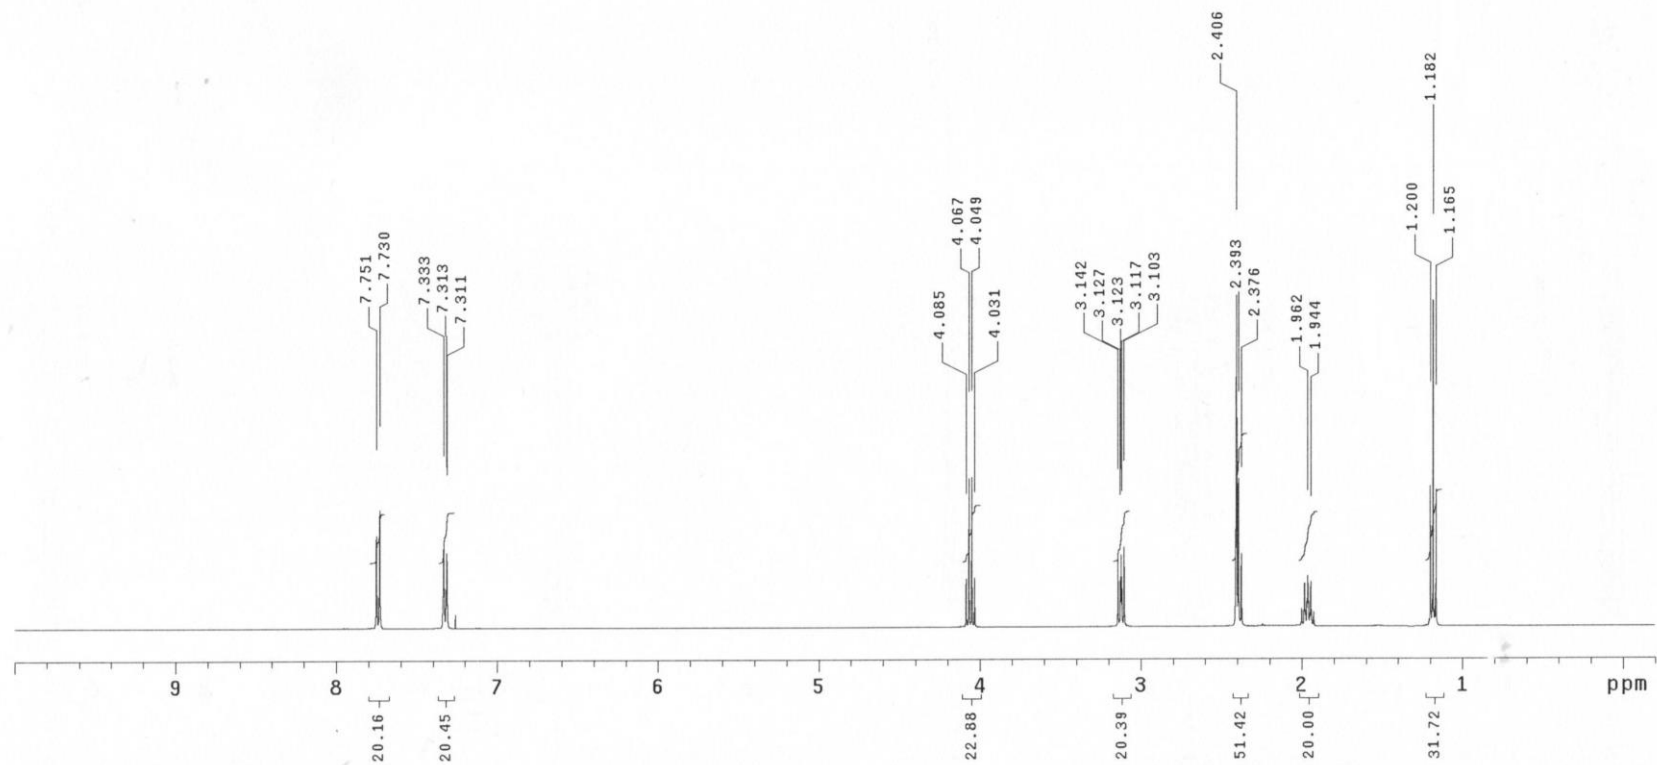

# Compound 5t (<sup>13</sup>C-NMR spectral data)

PS0104-1

Pulse Sequence: s2pu1

UNITYplus-400 "unity400"

Date: Jan 5 2021

Solvent: CDCl<sub>3</sub>

Ambient temperature

Total 336 repetitions

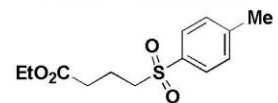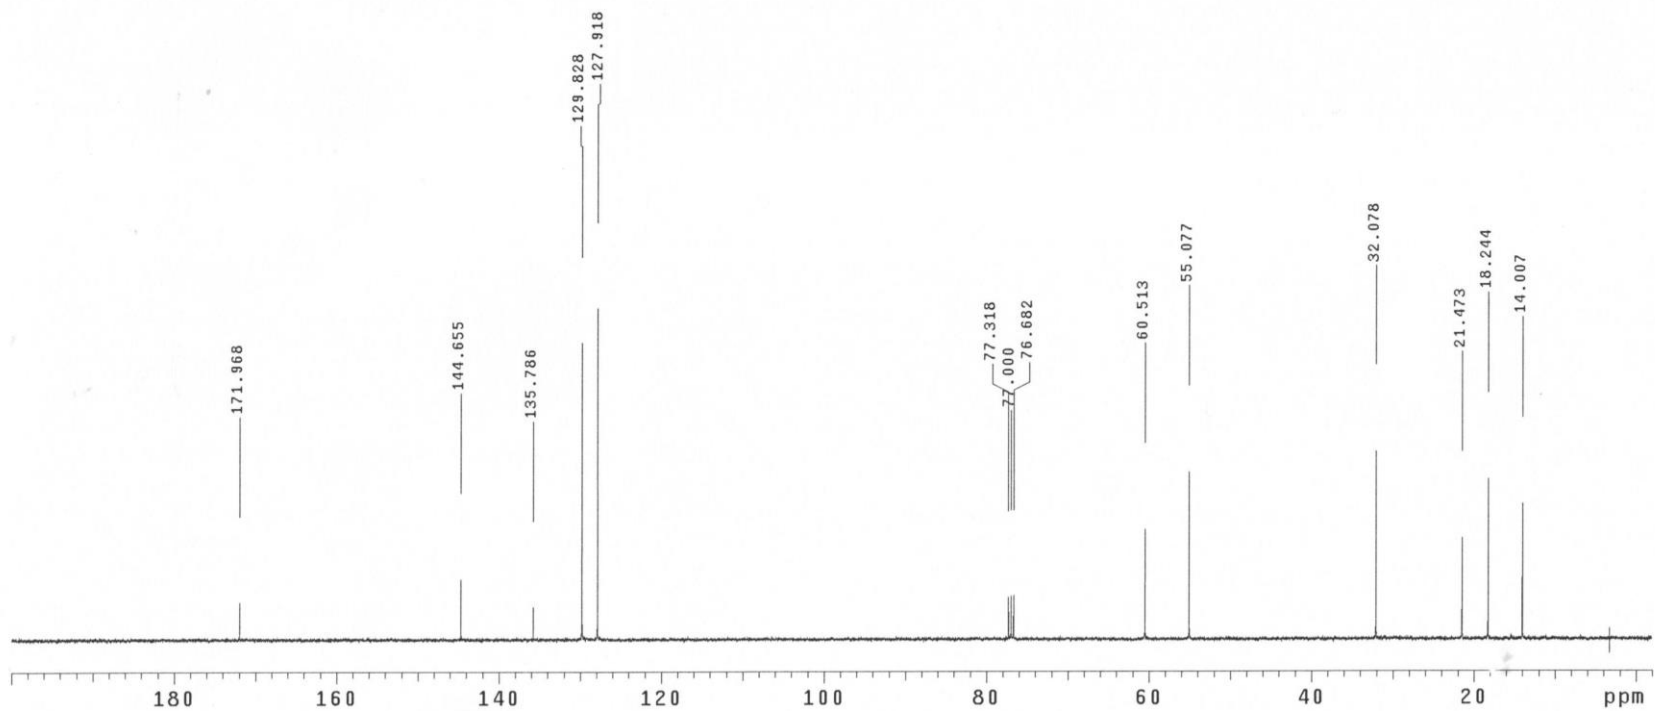

# Compound 5u (<sup>1</sup>H-NMR spectral data)

PS1231-1

Pulse Sequence: s2pu1

UNITYplus-400 "unity400"

Date: Dec 31 2020

Solvent: CDCl<sub>3</sub>

Ambient temperature

Total 32 repetitions

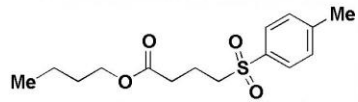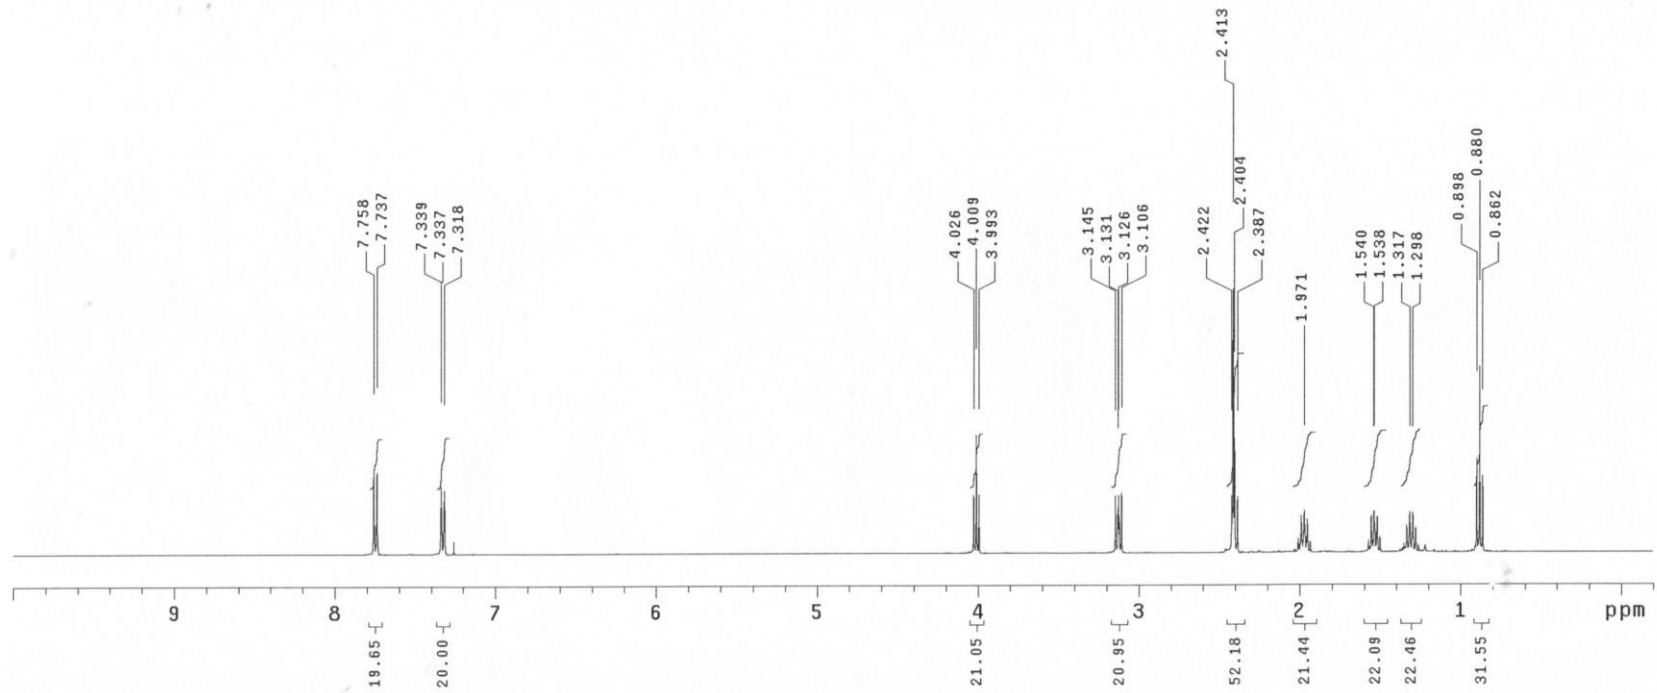

# Compound 5u (<sup>13</sup>C-NMR spectral data)

PS1231-1

Pulse Sequence: s2pu1

UNITYplus-400 "unity400"

Date: Dec 31 2020

Solvent: CDCl<sub>3</sub>

Ambient temperature

Total 432 repetitions

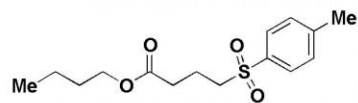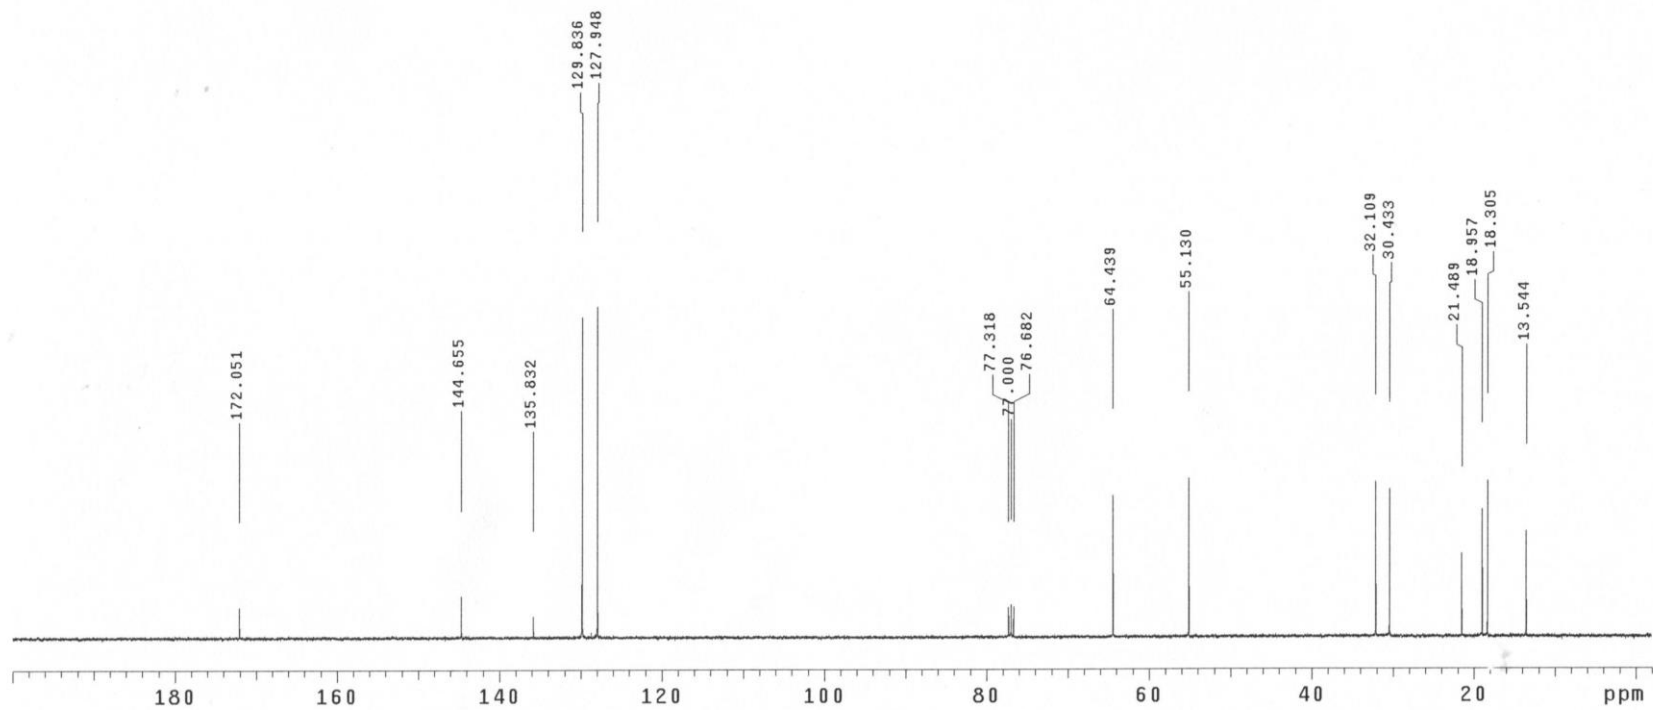

# Compound 5v (<sup>1</sup>H-NMR spectral data)

PS0108-1

Pulse Sequence: s2pu1

UNITYplus-400 "unity400"

Date: Jan 11 2021

Solvent: CDCl<sub>3</sub>

Ambient temperature

Total 32 repetitions

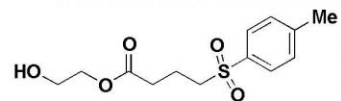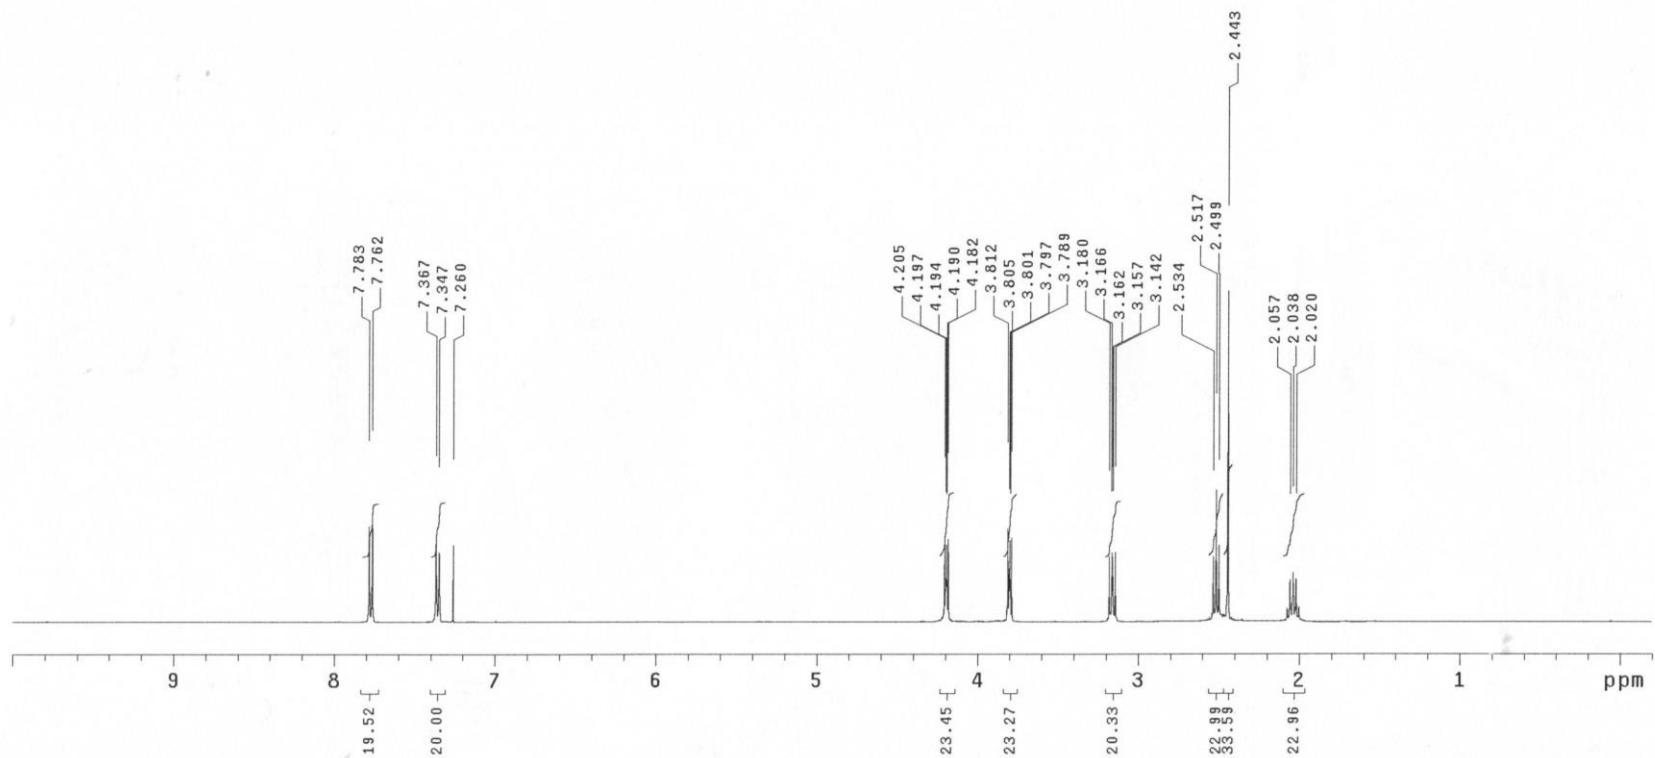

# Compound 5v (<sup>13</sup>C-NMR spectral data)

PS0108-1

Pulse Sequence: s2pu1

UNITYplus-400 "unity400"

Date: Jan 11 2021

Solvent: CDCl<sub>3</sub>

Ambient temperature

Total 3040 repetitions

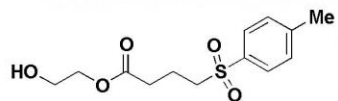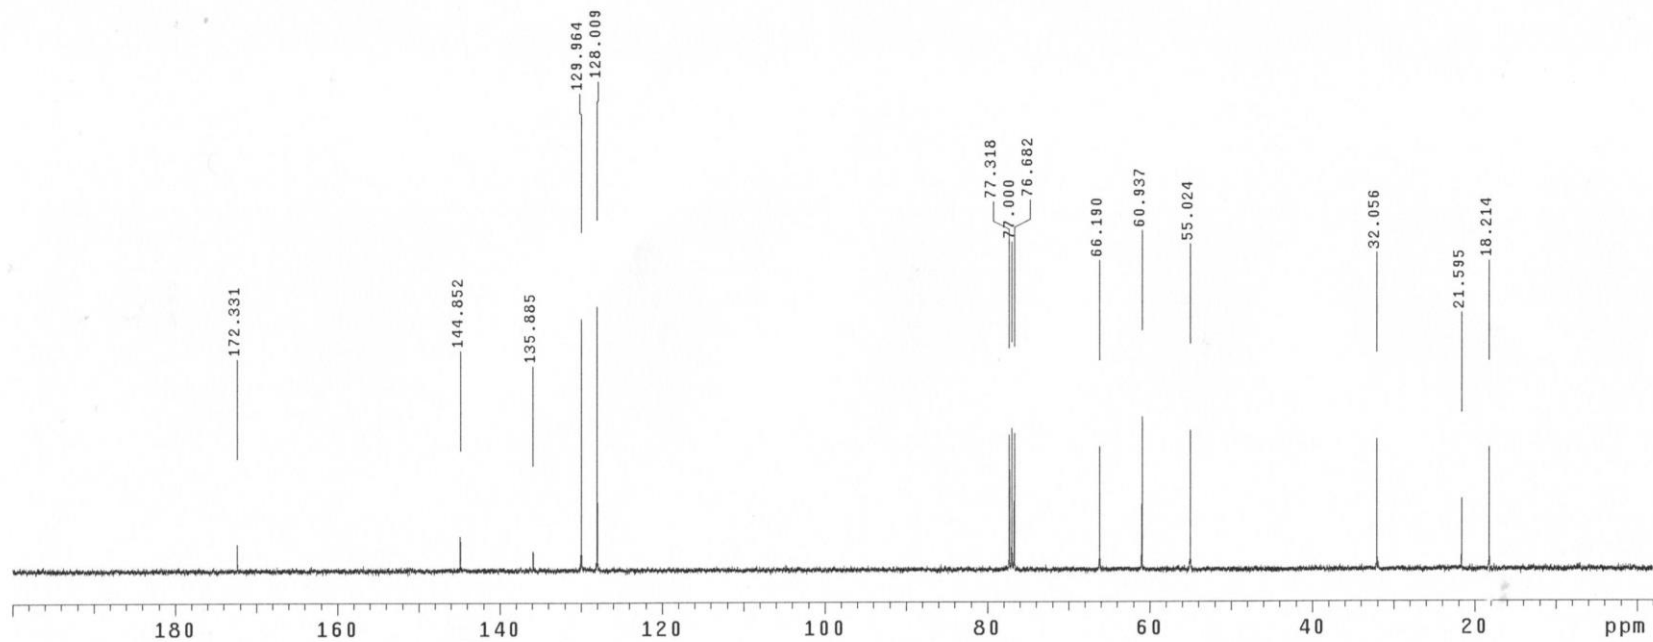

# Compound 5w (<sup>1</sup>H-NMR spectral data)

PS0106-1

Pulse Sequence: s2pu1  
UNITYplus-400 "unity400"  
Date: Jan 7 2021  
Solvent: CDC13  
Ambient temperature  
Total 32 repetitions

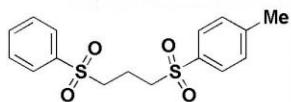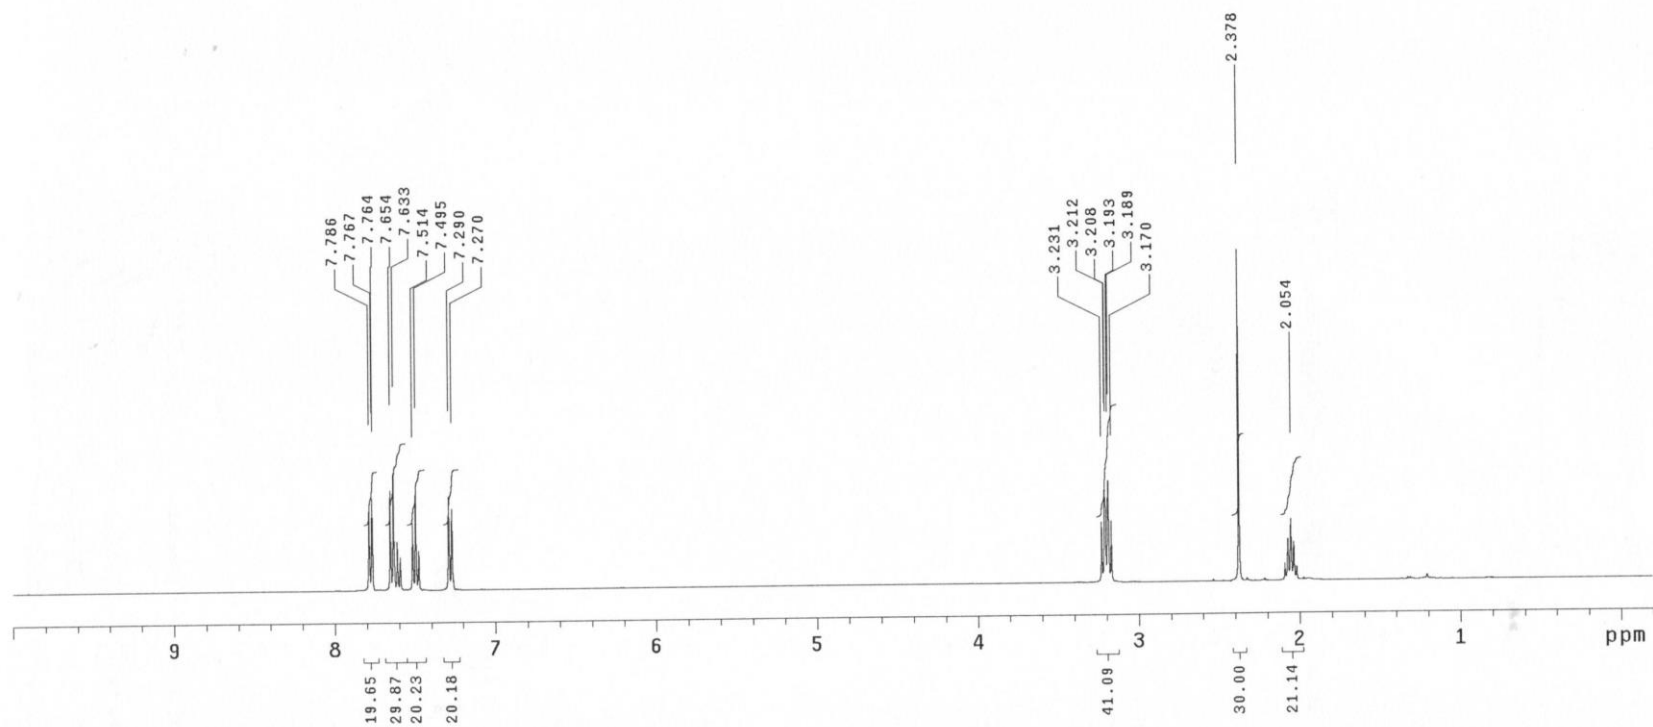



# Compound 5w (<sup>13</sup>C-NMR spectral data)

PS0106-1

Pulse Sequence: s2pu1  
UNITYplus-400 "unity400"  
Date: Jan 7 2021  
Solvent: CDCl<sub>3</sub>  
Ambient temperature  
Total 160 repetitions

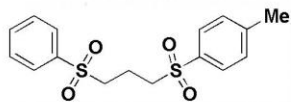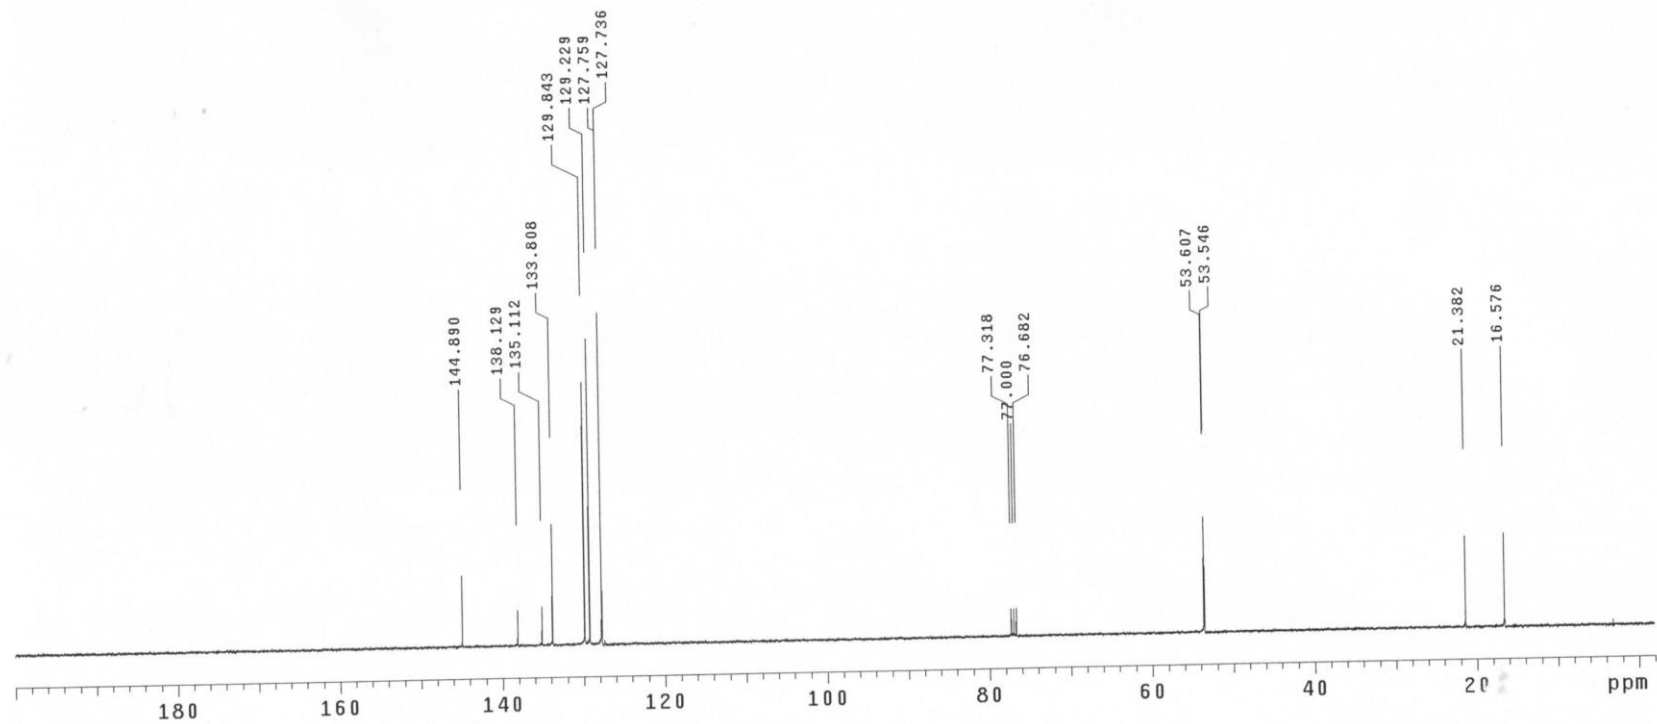

# Compound 5x (<sup>1</sup>H-NMR spectral data)

PS1230-1

Pulse Sequence: s2pu1

UNITYplus-400 "unity400"

Date: Dec 31 2020

Solvent: CDC13

Ambient temperature

Total 32 repetitions

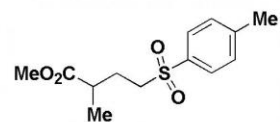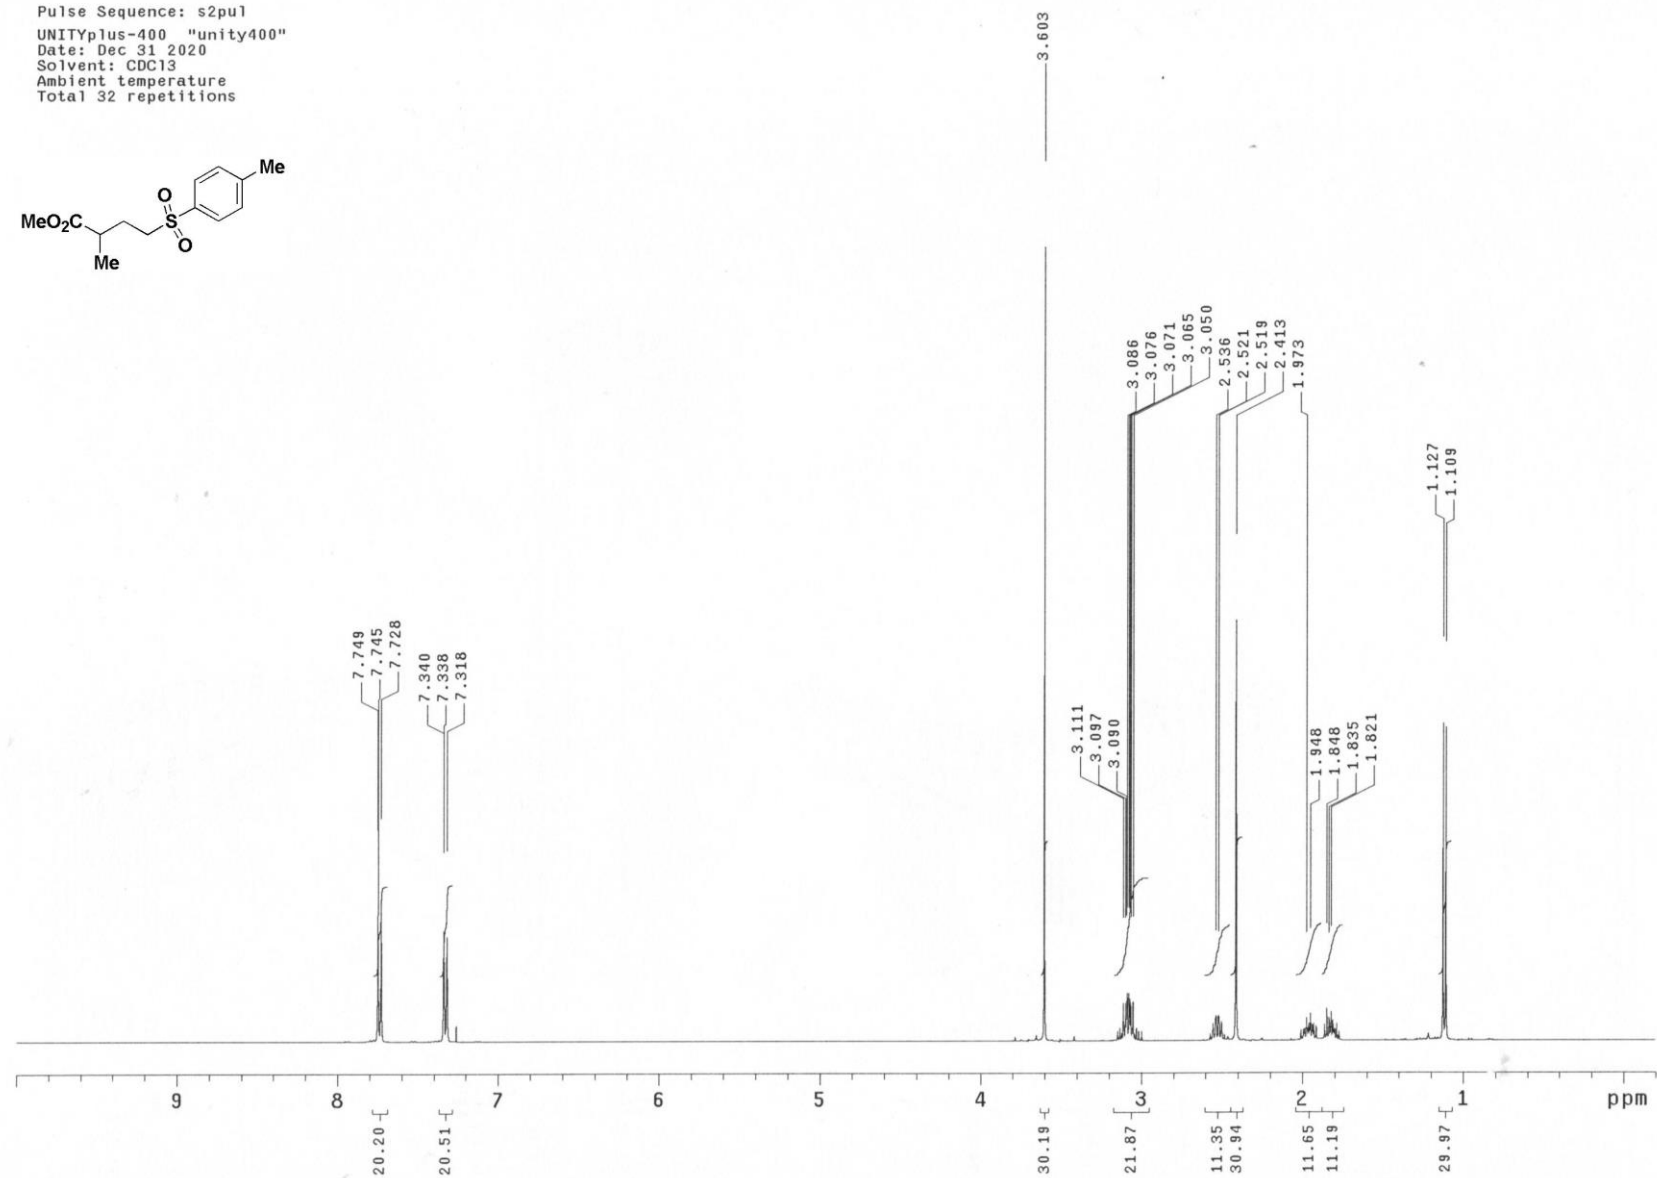

# Compound 5x (<sup>13</sup>C-NMR spectral data)

PS1230-1

Pulse Sequence: s2pu1

UNITYplus-400 "unity400"

Date: Dec 31 2020

Solvent: CDCl<sub>3</sub>

Ambient temperature

Total 400 repetitions

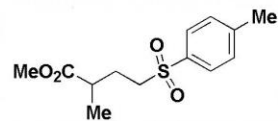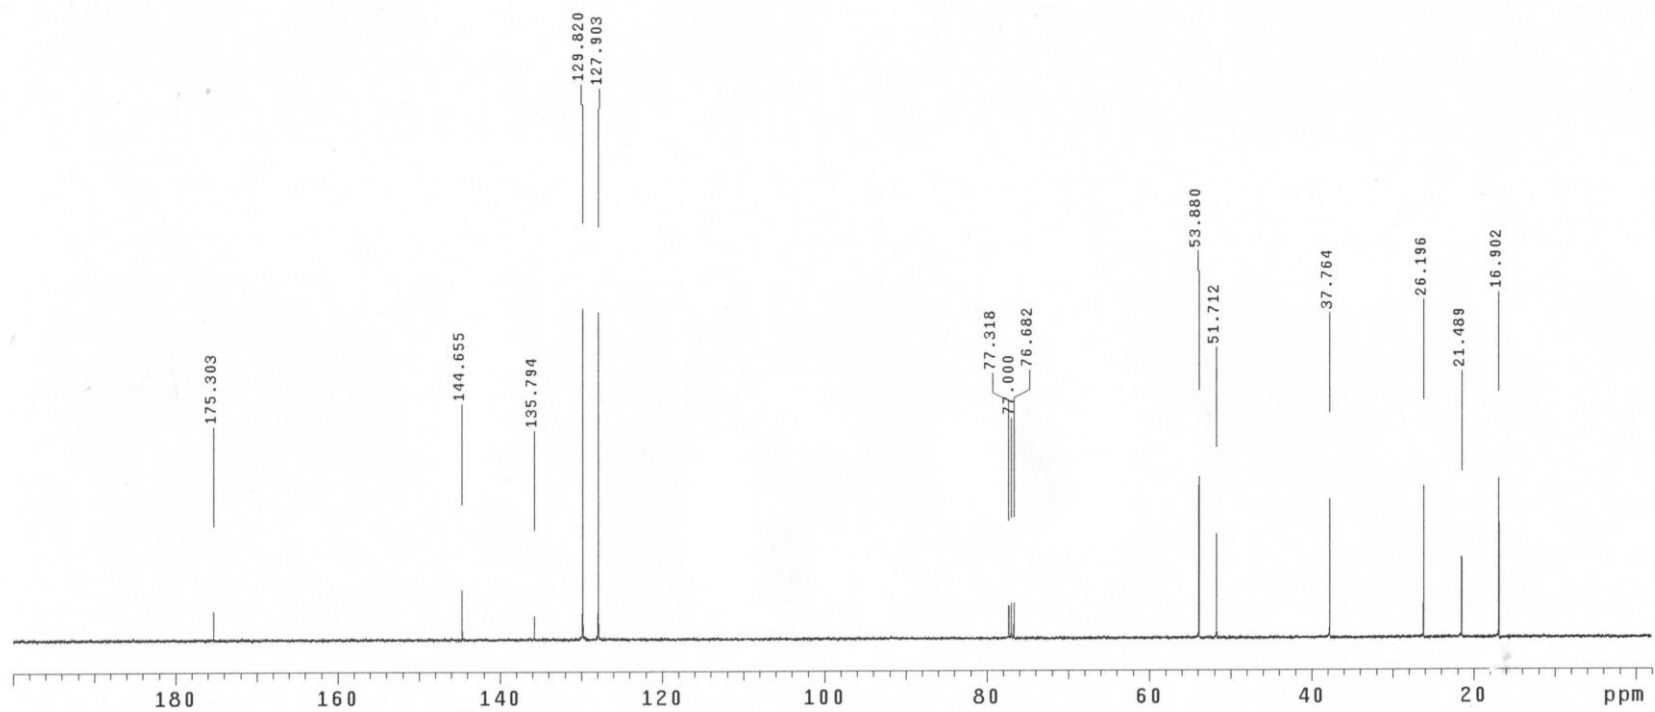

# Compound 5y (<sup>1</sup>H-NMR spectral data)

PS0114-1

Pulse Sequence: s2pu1

UNITYplus-400 "unity400"

Date: Jan 14 2021

Solvent: CDCl<sub>3</sub>

Ambient temperature

Total 32 repetitions

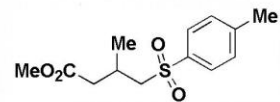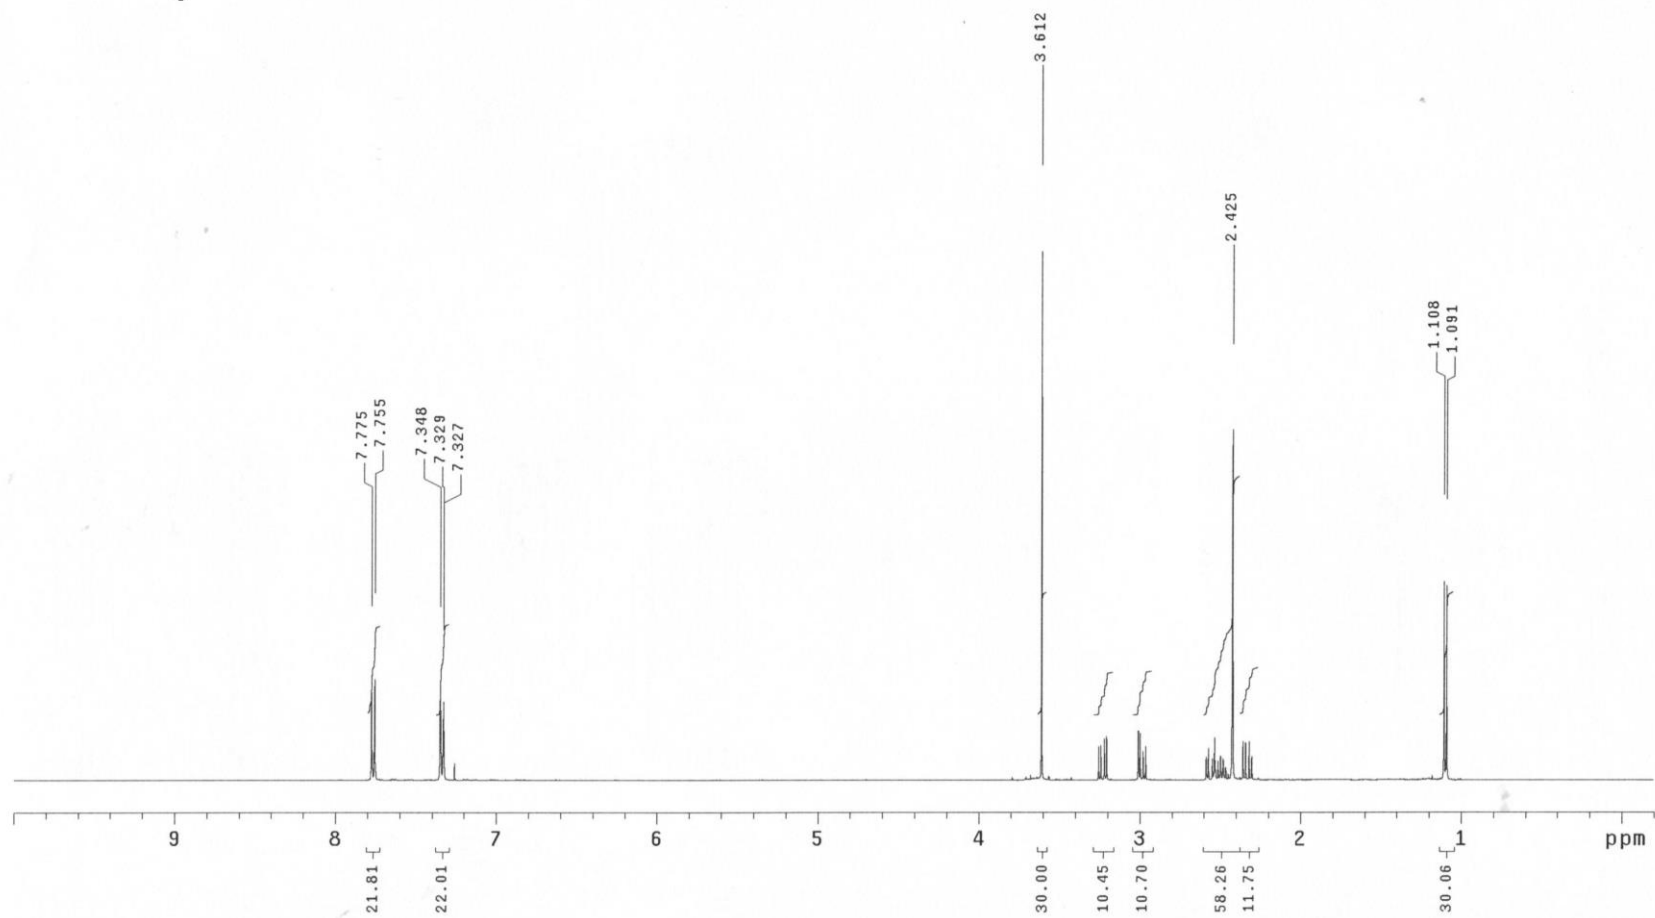

# Compound 5y (<sup>13</sup>C-NMR spectral data)

PS0114-1

Pulse Sequence: s2pu1

UNITYplus-400 "unity400"

Date: Jan 14 2021

Solvent: CDCl<sub>3</sub>

Ambient temperature

Total 800 repetitions

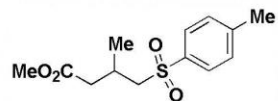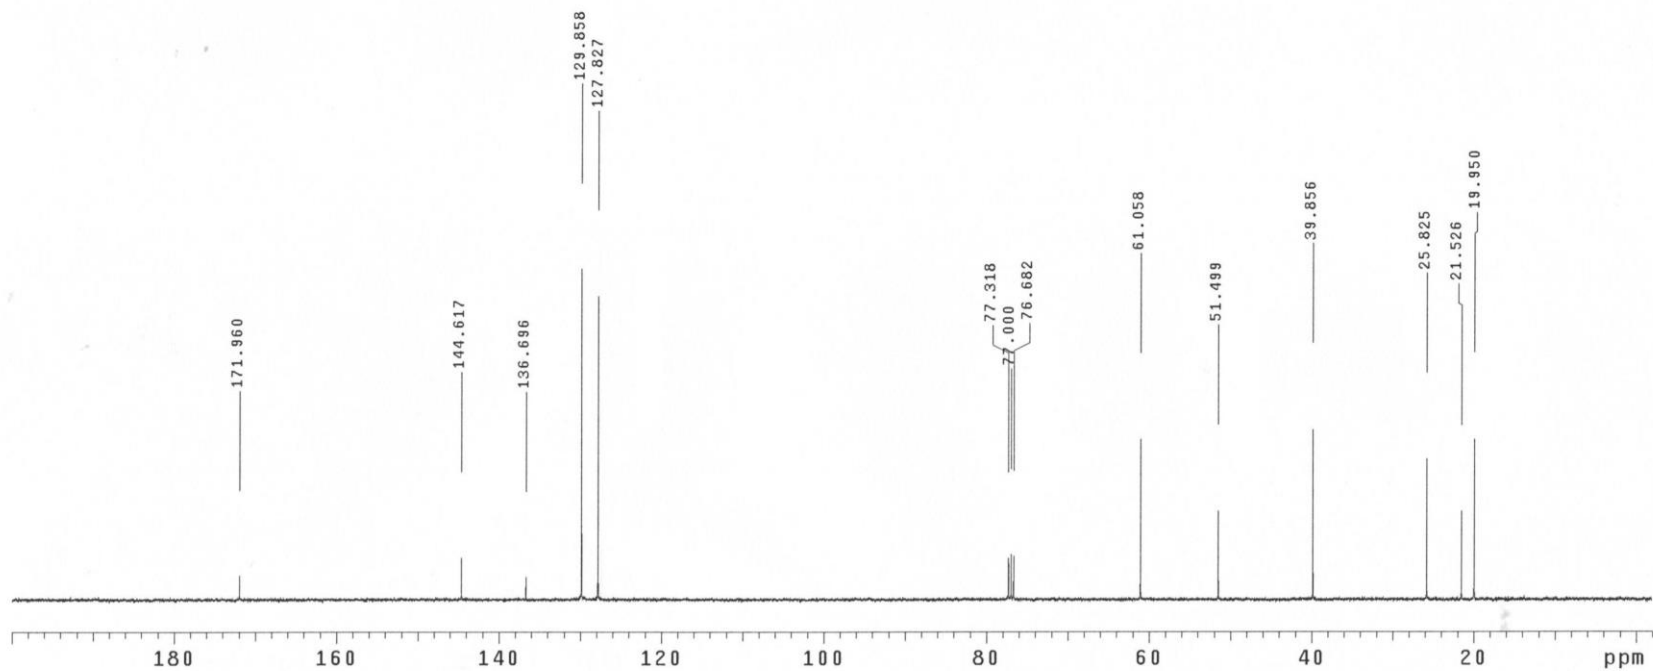

# Compound 8a (<sup>1</sup>H-NMR spectral data)

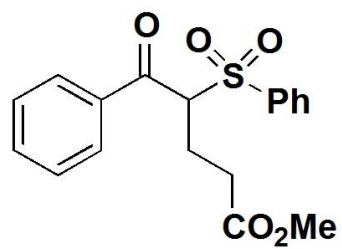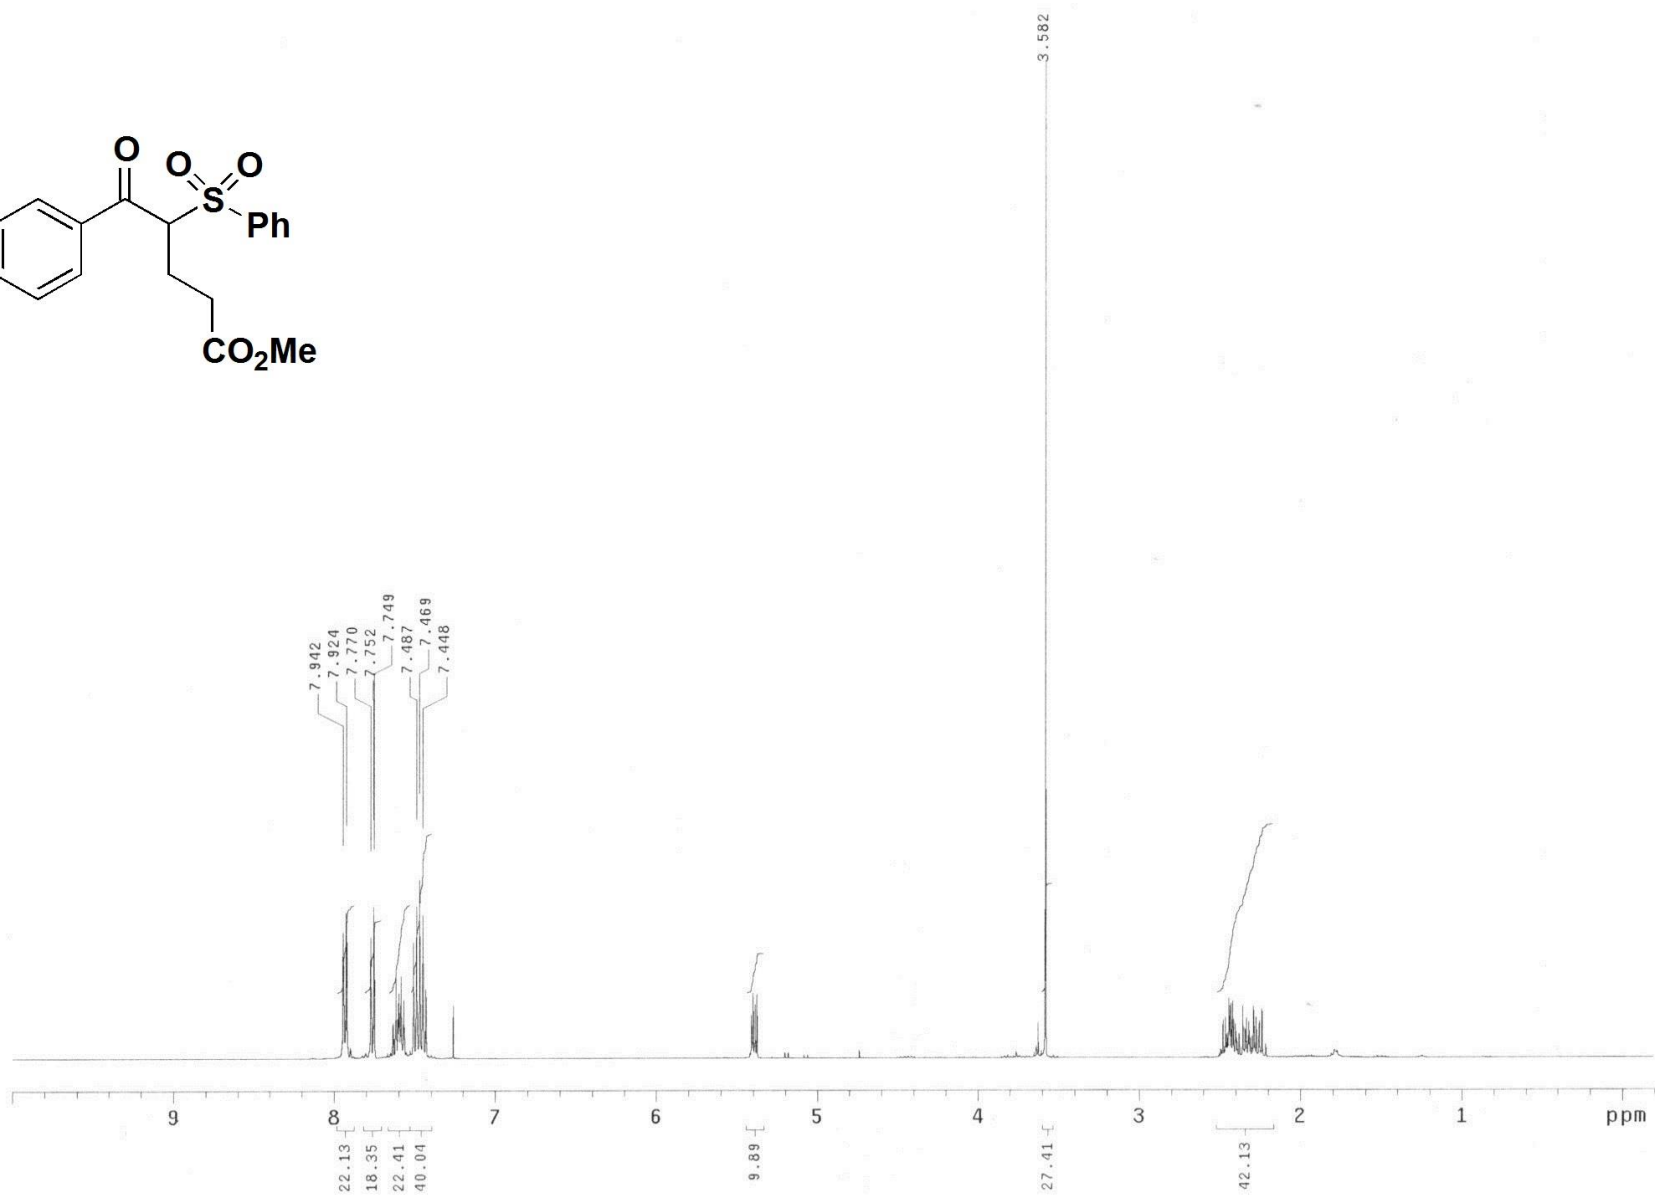

# Compound 8a (<sup>13</sup>C-NMR spectral data)

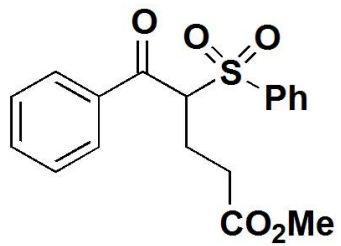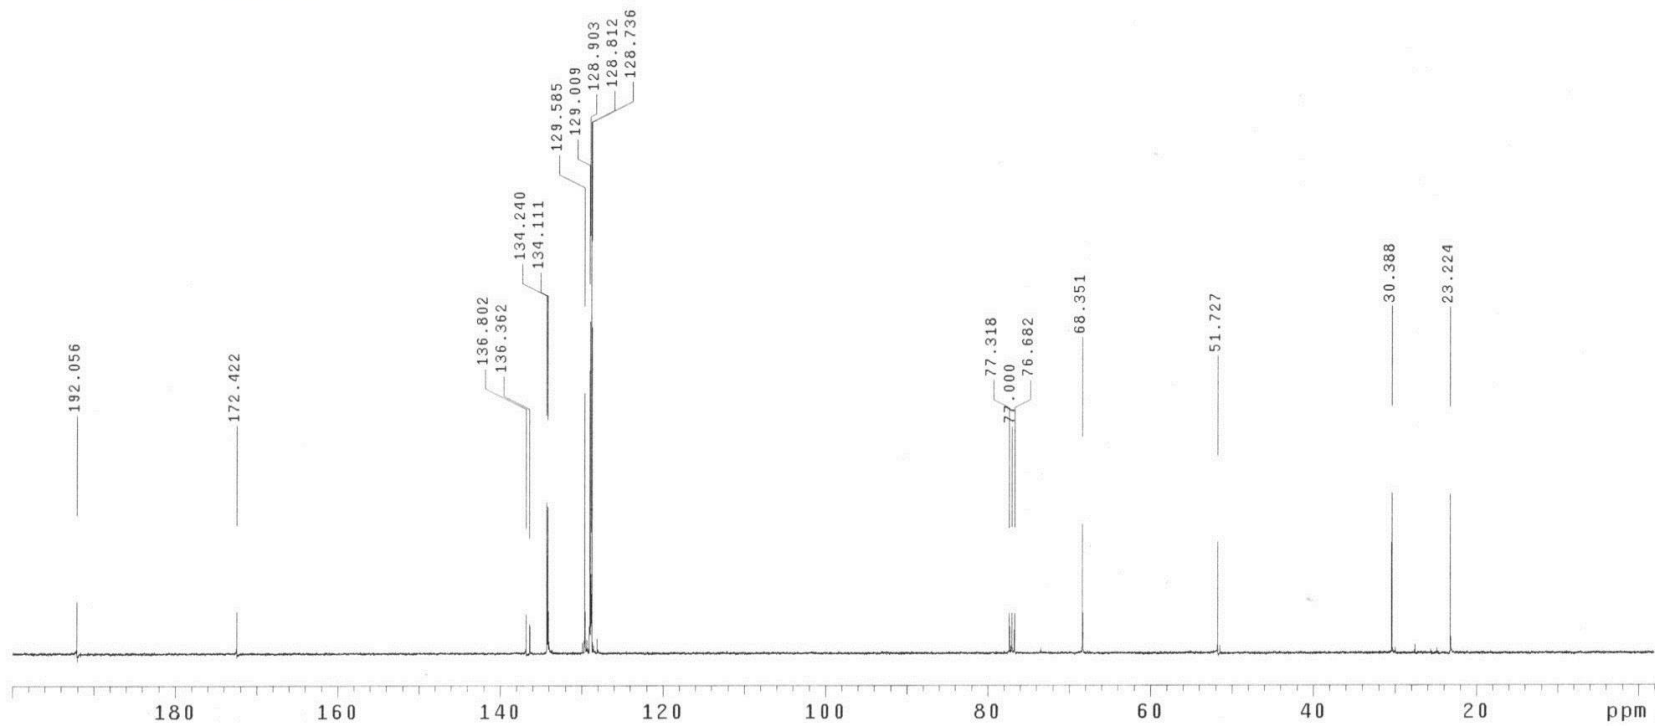

# Compound 8b (<sup>1</sup>H-NMR spectral data)

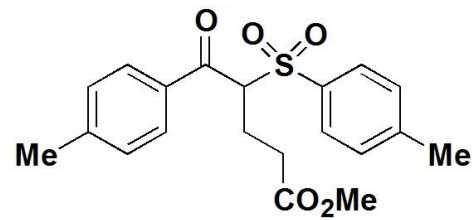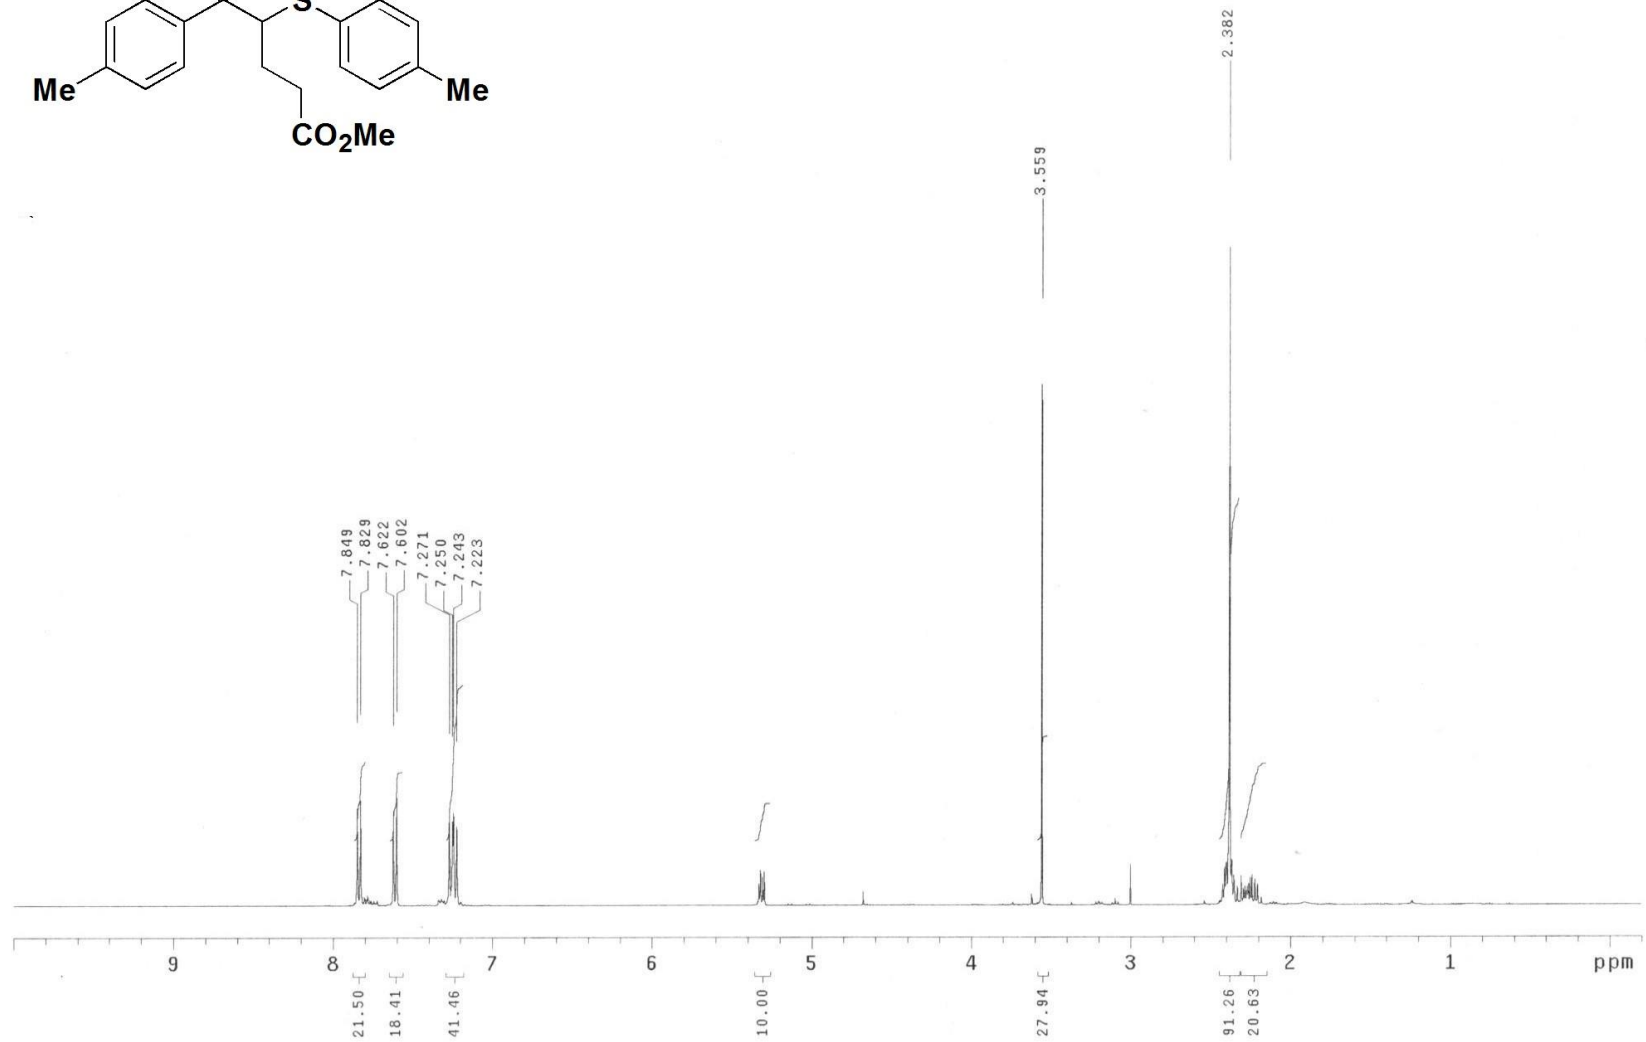



# Compound 8b (<sup>13</sup>C-NMR spectral data)

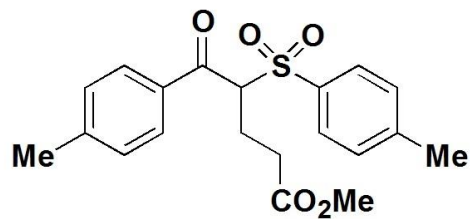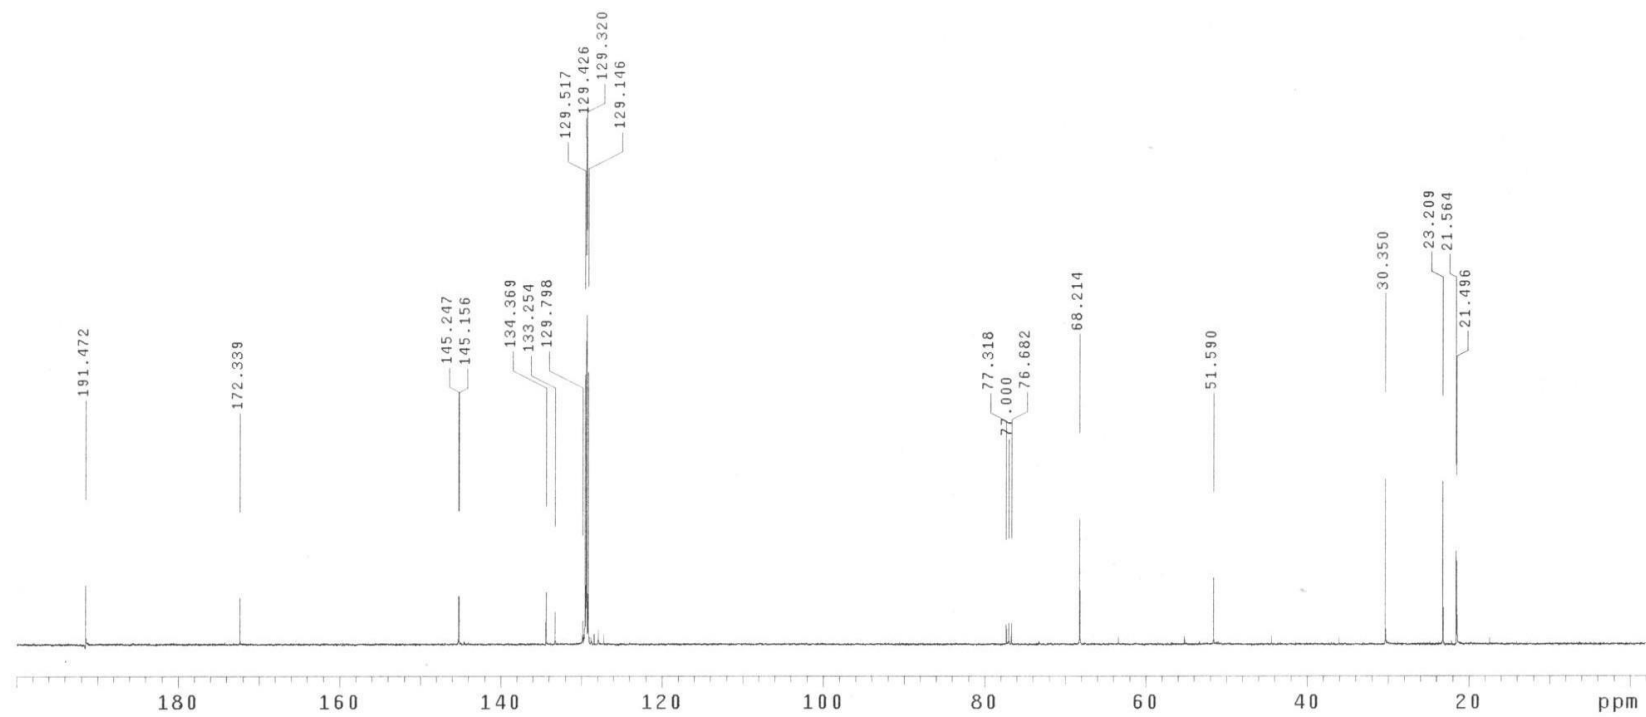

# Compound 9 (<sup>1</sup>H-NMR spectral data)

PS0115-1

Pulse Sequence: s2pu1  
UNITYplus-400 "unity400"  
Date: Jan 14 2021  
Solvent: CDCl<sub>3</sub>  
Ambient temperature  
Total 32 repetitions

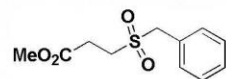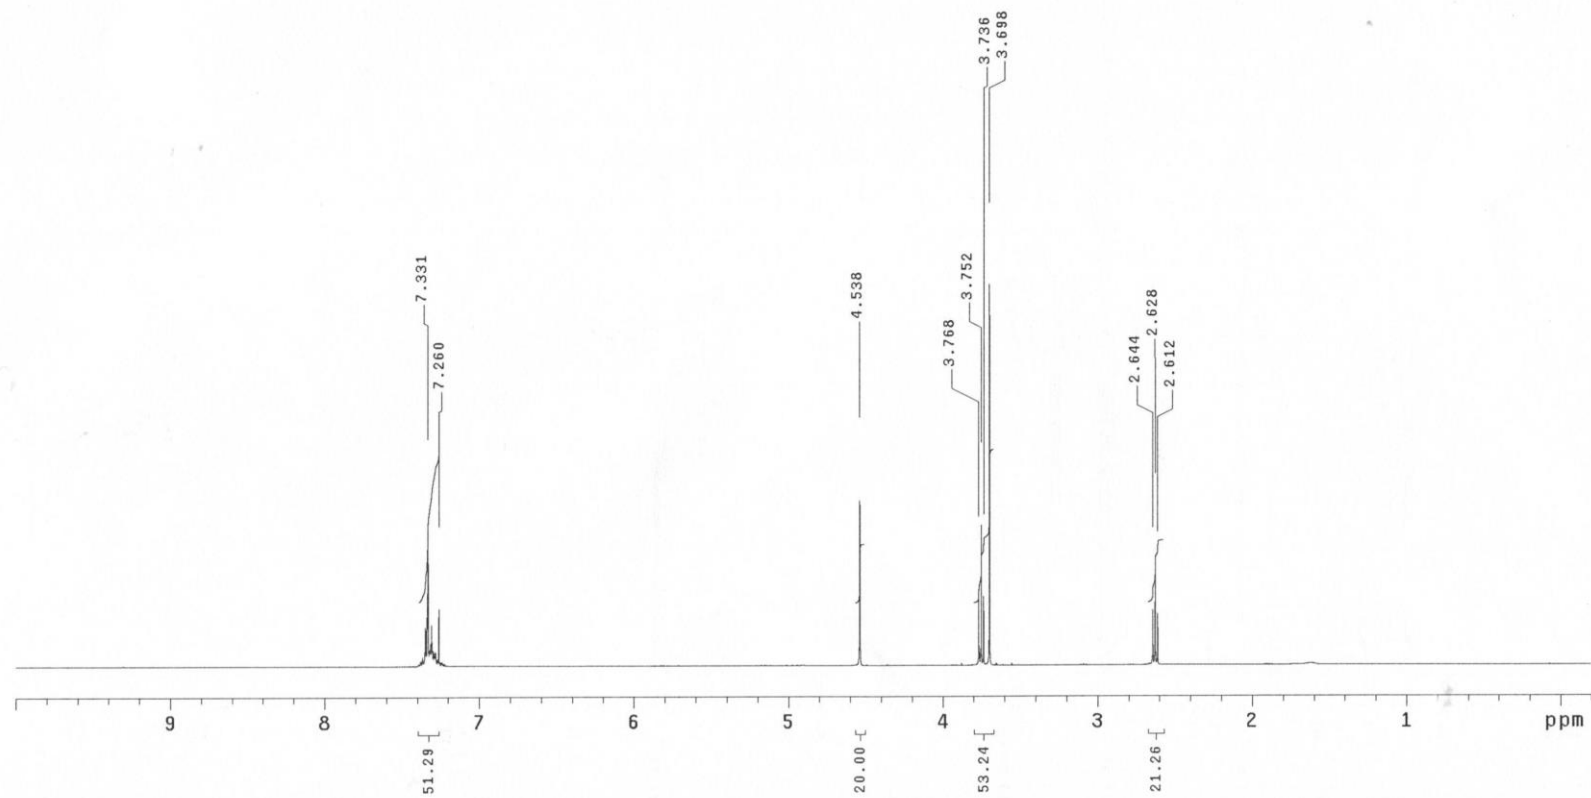

# Compound 9 (<sup>13</sup>C-NMR spectral data)

PS0115-1

Pulse Sequence: s2pu1

UNITYplus-400 "unity400"

Date: Jan 14 2021

Solvent: CDCl<sub>3</sub>

Ambient temperature

Total 2416 repetitions

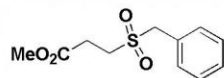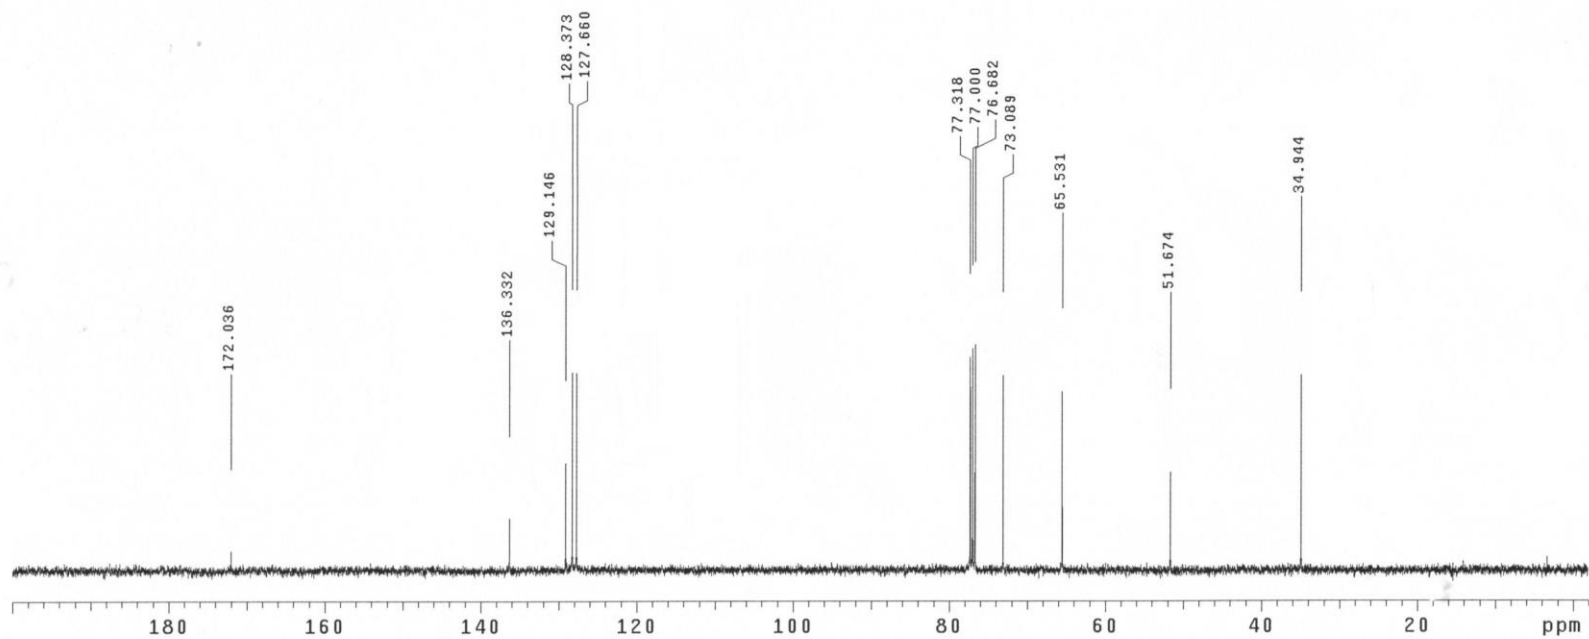

## X-ray crystal data of compound 7b

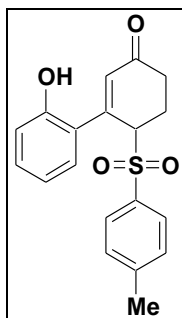

**Sample preparation** : A solution of compound **7b** (30 mg) in CH<sub>2</sub>Cl<sub>2</sub> (10 mL) was placed in a tube (10 mL). EtOAc (2 mL) was added slowly to the vial with a dropper. The vial was closed with little cotton and kept at room temperature for 2 days. Then, colorless prisms were observed.

**Crystal measurement** : X-ray crystal structures were determined with a Bruker Enraf-Nonius single-crystal diffractometer (CAD4, Kappa CCD). Thermal ellipsoids are drawn at 50% probability level.

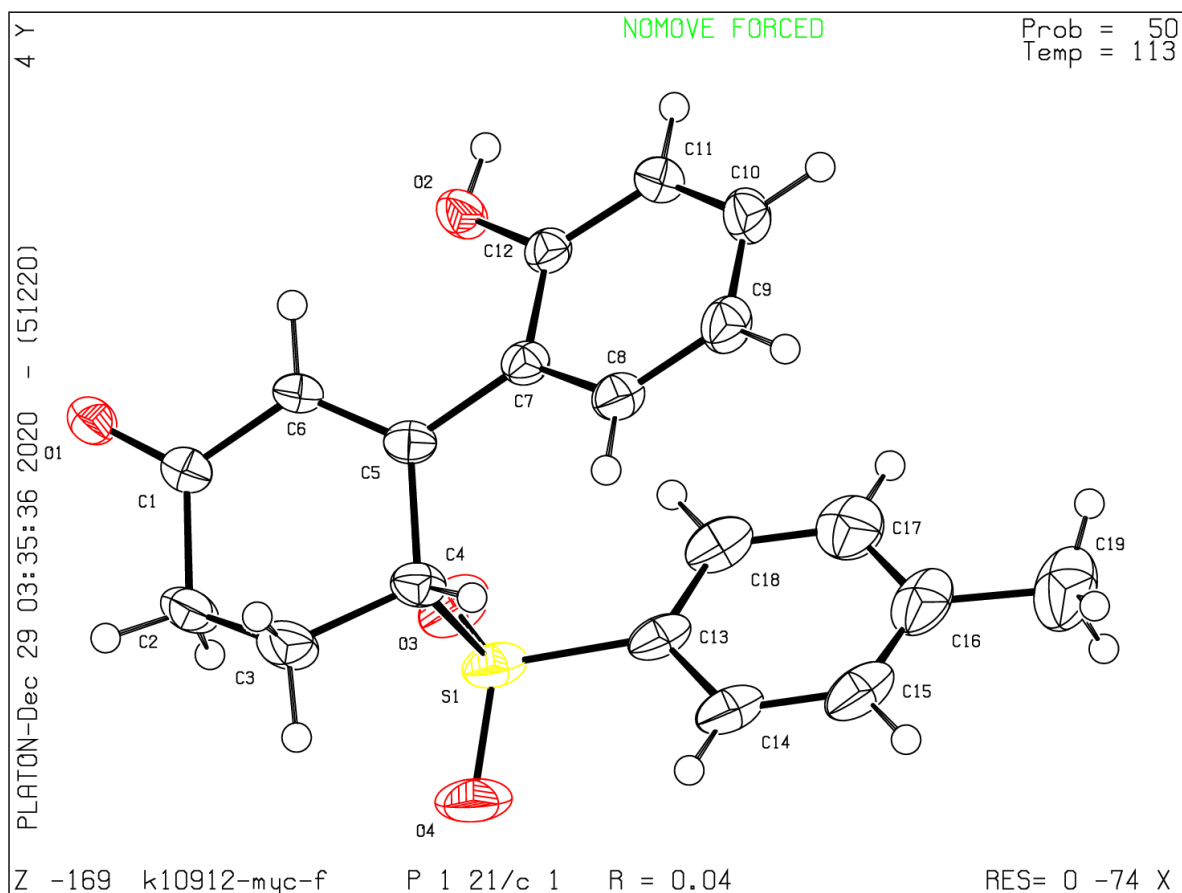

|                                             |                                                               |
|---------------------------------------------|---------------------------------------------------------------|
| Empirical formula                           | C <sub>19</sub> H <sub>18</sub> O <sub>4</sub> S              |
| Formula weight                              | 342.39                                                        |
| Temperature/K                               | 113(2)                                                        |
| Crystal system                              | monoclinic                                                    |
| Space group                                 | P2 <sub>1</sub> /c                                            |
| a/Å                                         | 16.5325(5)                                                    |
| b/Å                                         | 5.5611(2)                                                     |
| c/Å                                         | 19.0631(6)                                                    |
| α/°                                         | 90                                                            |
| β/°                                         | 110.600(4)                                                    |
| γ/°                                         | 90                                                            |
| Volume/Å <sup>3</sup>                       | 1640.58(10)                                                   |
| Z                                           | 4                                                             |
| ρ <sub>calc</sub> /cm <sup>3</sup>          | 1.386                                                         |
| μ/mm <sup>-1</sup>                          | 0.217                                                         |
| F(000)                                      | 720.0                                                         |
| Crystal size/mm <sup>3</sup>                | 0.36 × 0.2 × 0.15                                             |
| Radiation                                   | Mo Kα (λ = 0.71073)                                           |
| 2θ range for data collection/°              | 4.394 to 54.05                                                |
| Index ranges                                | -20 ≤ h ≤ 20, -7 ≤ k ≤ 4, -24 ≤ l ≤ 23                        |
| Reflections collected                       | 15178                                                         |
| Independent reflections                     | 3403 [R <sub>int</sub> = 0.0316, R <sub>sigma</sub> = 0.0333] |
| Data/restraints/parameters                  | 3403/0/219                                                    |
| Goodness-of-fit on F <sup>2</sup>           | 1.057                                                         |
| Final R indexes [I ≥ 2σ (I)]                | R <sub>1</sub> = 0.0390, wR <sub>2</sub> = 0.0973             |
| Final R indexes [all data]                  | R <sub>1</sub> = 0.0507, wR <sub>2</sub> = 0.1031             |
| Largest diff. peak/hole / e Å <sup>-3</sup> | 0.24/-0.37                                                    |
